# Supplementary material for: Synthesis of nickel–iron hydrogenase in Cupriavidus metallidurans is controlled by metal-dependent silencing and un-silencing of genomic islands
Source: Royal Society of Chemistry journal article supplement (doi:10.1039/c4mt00297k), 2015-01-01
Supplement: c4mt00297k1.pdf [file c4mt00297k1.pdf]

**Supplementary Table S1. The key enzymes for autotrophic growth in *C. metallidurans***

| Name | Rmet-number            | Spec.           | Predicted Mass, (kDa)          | Determined Mass, (kDa)                                       |
|------|------------------------|-----------------|--------------------------------|--------------------------------------------------------------|
|      |                        | <b>Activity</b> |                                |                                                              |
| HOS  | Rmet_1522 to Rmet_1525 | 28.7            | 65.2, 25.4, 23.4, 52.8 = 166.8 | 62.4±1.8, 26.4±1.3, 24.0±0.6, 54.1±2.5, =235±20 <sup>a</sup> |
| HOP  | Rmet_1297, Rmet_1298,  | 67.0            | 69.0 + 38.6 = 108              | 148±24 <sup>a</sup>                                          |
| CAX  | Rmet_1500, Rmet_1501   | 2.82            | 8 * (13.6 + 52.5) = 529        | 475±36 <sup>a</sup>                                          |
| PRK  | Rmet_1512              | 0.994           | 8 * 32.4 = 259                 | 256±11 <sup>a</sup>                                          |

<sup>a</sup>Mean value of masses determined by S300 size exclusion chromatography and sucrose gradient centrifugation. HOS, NAD-reducing soluble hydrogenase; HOP, membrane-bound hydrogenase; CAX, ribulose-bis-phosphate carboxylase/oxygenase; PRK, phosphoribulokinase. Specific activity in U/mg protein.

Supplementary Table S2. Genes expressed differently in AE104 compared to CH34 wild type<sup>a</sup>

| Operon Region                         | Name      | Gene          | Q     | D     | Description                                                      |
|---------------------------------------|-----------|---------------|-------|-------|------------------------------------------------------------------|
| <b>UP</b>                             |           |               |       |       |                                                                  |
| Op1321r                               | Rmet_4594 | <i>zntA</i>   | 1.72  | 2.88  | Q1LEH0 Heavy metal translocating P-type ATPase                   |
| Op1322f                               | Rmet_4595 | <i>czcI2</i>  | 2.03  | 2.92  | Q1LEG9 Putative uncharacterized protein                          |
| Op1322f                               | Rmet_4596 | <i>czcC2</i>  | 23.34 | 5.36  | Q1LEG8 Outer membrane efflux protein                             |
| Op1322f                               | Rmet_4597 | <i>czcB2'</i> | 15.36 | 9.68  | Q1LEG7 Secretion protein HlyD                                    |
| Op0075f                               | Rmet_0260 | -             | 2.31  | 2.48  | Q1LRT0 Putative transmembrane protein                            |
| Op0075f                               | Rmet_0261 | <i>coxB</i>   | 2.08  | 2.49  | Q1LRS9 Cytochrome c oxidase subunit 2                            |
| <b>Adjacent to CMGI-7</b>             |           |               |       |       |                                                                  |
| Op0335f                               | Rmet_1171 | <i>tnpA</i>   | 7.03  | 21.74 | Q9F8S6 Transposase (Transposase, IS4 family)                     |
| <b>CMGI-2</b>                         |           |               |       |       |                                                                  |
| Op0362r                               | Rmet_1251 | <i>tnp</i>    | 4.08  | 0.61  | Q1LNY9 Putative uncharacterized protein                          |
| <b>CMGI-1</b>                         |           |               |       |       |                                                                  |
| Op0663f                               | Rmet_2349 | -             | 2.44  | 1.15  | Q8GQ59 Putative uncharacterized protein ORF C51                  |
| Op0671f                               | Rmet_2382 | <i>tnpA</i>   | 4.49  | 23.38 | Q1LB62 Integrase, catalytic region                               |
| <b>CMGI-10</b>                        |           |               |       |       |                                                                  |
| Op0934r                               | Rmet_3353 | <i>tnpA</i>   | 2.77  | 4.55  | Q9F8S6 Transposase (Transposase, IS4 family)                     |
| <b>DOWN</b>                           |           |               |       |       |                                                                  |
| <b>aut region 1, Region 1, CMGI-3</b> |           |               |       |       |                                                                  |
| Op0421f                               | Rmet_1491 | -             | 0.13  | 3.76  | Q6SKD6 Transposase                                               |
| Op0422r                               | Rmet_1492 | <i>cbbA1</i>  | 0.49  | 2.07  | Q1LNA1 Fructose-bisphosphate aldolase                            |
| Op0422r                               | Rmet_1493 | <i>fbaA</i>   | 0.69  | 0.87  | Q1LNA0 Putative uncharacterized protein                          |
| Op0422r                               | Rmet_1494 | -             | 0.43  | 1.71  | Q1LN99 Putative uncharacterized protein                          |
| Op0422r                               | Rmet_1495 | -             | 0.59  | 1.51  | Q1LN98 Putative uncharacterized protein                          |
| Op0422r                               | Rmet_1496 | -             | 0.20  | 1.49  | Q1LN97 Putative uncharacterized protein                          |
| Op0422r                               | Rmet_1497 | -             | 0.63  | 2.71  | Q1LN96 Putative uncharacterized protein                          |
| Op0422r                               | Rmet_1498 | <i>cbbO</i>   | 0.12  | 4.01  | Q1LN95 von Willebrand factor, type A                             |
| Op0422r                               | Rmet_1499 | <i>cbbQ</i>   | 0.06  | 5.07  | Q1LN94 ATPase associated with various cellular activities, AAA_5 |
| Op0422r                               | Rmet_1500 | <i>cbbS</i>   | 0.08  | 5.16  | Q1LN93 Ribulose bisphosphate carboxylase small chain             |
| Op0422r                               | Rmet_1501 | <i>rbcl</i>   | 0.09  | 12.53 | Q1LN92 Ribulose bisphosphate carboxylase large chain             |

|         |           |              |      |       |                                                                    |
|---------|-----------|--------------|------|-------|--------------------------------------------------------------------|
| Op0423f | Rmet_1502 | -            | 0.04 | 5.13  | Q1LN91 Transcriptional regulator, LysR family                      |
| Op0423f | Rmet_1503 | -            | 0.64 | 4.64  | Q9RBF5 Ralstonia eutropha insertion sequence IS1090                |
| Op0424r | Rmet_1504 | -            | 0.48 | 3.26  | Q1LN89 Putative uncharacterized protein                            |
| Op0424r | Rmet_1505 | -            | 0.12 | 6.40  | Q1LN88 ISSod11, transposase                                        |
| Op0424r | Rmet_1506 | -            | 0.21 | 5.26  | Q6SKD6 Transposase                                                 |
| Op0424r | Rmet_1507 | <i>cbbF1</i> | 0.59 | 1.57  | Q1LN86 D-fructose 1,6-bisphosphatase                               |
| Op0424r | Rmet_1508 | <i>cbbR</i>  | 0.41 | 3.08  | Q1LN85 Transcriptional regulator, LysR family                      |
| Op0425f | Rmet_1509 | -            | 0.09 | 5.62  | Q1LN84 Putative uncharacterized protein                            |
| Op0425f | Rmet_1510 | <i>cbbE1</i> | 0.04 | 8.48  | Q1LN83 Ribulose-5-phosphate 3-epimerase                            |
| Op0425f | Rmet_1511 | <i>cbbF2</i> | 0.08 | 8.54  | Q1LN82 D-fructose 1,6-bisphosphatase                               |
| Op0425f | Rmet_1512 | <i>cbbP</i>  | 0.09 | 5.82  | Q1LN81 Phosphoribulokinase                                         |
| Op0425f | Rmet_1513 | <i>cbbT1</i> | 0.54 | 2.53  | Q1LN80 Transketolase                                               |
| Op0425f | Rmet_1514 | <i>cbbZ1</i> | 0.12 | 4.77  | Q1LN79 Phosphoglycolate phosphatase                                |
| Op0425f | Rmet_1515 | <i>cbbG1</i> | 0.16 | 5.40  | Q1LN78 Glyceraldehyde-3-phosphate dehydrogenase                    |
| Op0425f | Rmet_1517 | <i>cbbY</i>  | 0.10 | 9.03  | Q1LN76 HAD-superfamily hydrolase subfamily IA, variant 3           |
| Op0425f | Rmet_1518 | <i>cbbA2</i> | 0.07 | 5.00  | Q1LN75 Fructose-bisphosphate aldolase                              |
| Op0425f | Rmet_1519 | <i>pykA2</i> | 0.17 | 9.60  | Q1LN74 Pyruvate kinase                                             |
| Op0425f | Rmet_1520 | <i>cbbJ1</i> | 0.34 | 6.95  | Q1LN73 Triosephosphate isomerase                                   |
| Op0425f | Rmet_1521 | <i>cbbI1</i> | 0.13 | 4.52  | Q1LN72 Ribose-5-phosphate isomerase                                |
| Op0425f | Rmet_1522 | <i>hoxF</i>  | 0.01 | 4.95  | Q1LN71 Respiratory-chain NADH dehydrogenase domain, 51 kDa subunit |
| Op0425f | Rmet_1523 | <i>hoxU</i>  | 0.01 | 5.14  | Q1LN70 Ferredoxin                                                  |
| Op0425f | Rmet_1524 | <i>hoxY</i>  | 0.00 | 6.62  | Q1LN69 NADH ubiquinone oxidoreductase, 20 kDa subunit              |
| Op0425f | Rmet_1525 | <i>hoxH</i>  | 0.02 | 8.18  | Q1LN68 Nickel-dependent hydrogenase, large subunit                 |
| Op0425f | Rmet_1526 | <i>hoxW</i>  | 0.00 | 8.28  | Q1LN67 HoxW protein                                                |
| Op0425f | Rmet_1527 | <i>hoxI</i>  | 0.00 | 13.64 | Q1LN66 Cyclic nucleotide-binding domain (CNMP-BD) protein          |
| Op0425f | Rmet_1528 | -            | 0.39 | 7.34  | Q1LN65 Alanine dehydrogenase/PNT-like protein                      |
| Op0426r | Rmet_1529 | -            | 0.70 | 2.67  | Q1LB62 Integrase, catalytic region                                 |
| Op0427f | Rmet_1530 | -            | 0.35 | 2.22  | Q1LN63 Alanine dehydrogenase/PNT-like protein                      |
| Op0427f | Rmet_1531 | <i>pntA</i>  | 0.26 | 5.08  | Q1LN62 Pyridine nucleotide transhydrogenase subunit alpha          |
| Op0427f | Rmet_1532 | <i>pntB</i>  | 0.44 | 2.92  | Q1LN61 NAD(P) transhydrogenase, beta subunit                       |
| Op0427f | Rmet_1533 | <i>hoxN</i>  | 0.77 | 0.15  | Q1LN60 High-affinity nickel-transporter                            |
| Op0427f | Rmet_1534 | -            | 0.00 | 7.06  | Q1LN59 Putative uncharacterized protein                            |
| Op0427f | Rmet_1535 | <i>hypA</i>  | 0.00 | 7.12  | Q1LN58 Hydrogenase nickel insertion protein HypA                   |
| Op0427f | Rmet_1536 | <i>hypB</i>  | 0.01 | 14.80 | Q1LN57 Hydrogenase accessory protein HypB                          |

|         |           |             |      |       |                                                               |
|---------|-----------|-------------|------|-------|---------------------------------------------------------------|
| Op0427f | Rmet_1537 | <i>hypF</i> | 0.01 | 8.22  | Q1LN56 (NiFe) hydrogenase maturation protein HypF             |
| Op0427f | Rmet_1538 | <i>hypC</i> | 0.01 | 13.63 | Q1LN55 Hydrogenase assembly chaperone hypC/hupF               |
| Op0427f | Rmet_1539 | <i>hypD</i> | 0.00 | 14.76 | Q1LN54 Hydrogenase expression/formation protein HypD          |
| Op0427f | Rmet_1540 | <i>hypE</i> | 0.00 | 4.08  | Q1LN53 Hydrogenase expression/formation protein HypE          |
| Op0427f | Rmet_1541 | <i>hoxX</i> | 0.02 | 5.68  | Q1LN52 Formyl transferase-like protein                        |
| Op0427f | Rmet_1542 | <i>hoxA</i> | 0.01 | 6.68  | Q1LN51 Response regulator receiver domain protein (CheY-like) |
| Op0428r | Rmet_1543 | -           | 0.29 | 2.39  | Q1LN50 Stress responsive alpha-beta barrel                    |
| Op0430r | Rmet_1545 | -           | 0.17 | 3.42  | Q1LN48 Putative uncharacterized protein                       |
| Op0431f | Rmet_1546 | -           | 0.25 | 2.48  | Q1LN47 Transcriptional regulator, LysR family                 |
| Op0431f | Rmet_1547 | -           | 0.31 | 2.99  | Q1LN46 Putative lipoprotein                                   |

#### Region 2 = CMGI-4

|         |           |              |      |       |                                                                                                                                       |
|---------|-----------|--------------|------|-------|---------------------------------------------------------------------------------------------------------------------------------------|
| Op0847f | Rmet_3013 | <i>yodB</i>  | 0.06 | 5.94  | Q1LIZ0 Cytochrome B561                                                                                                                |
| Op0847f | Rmet_3014 | -            | 0.16 | 4.62  | A0HB61 Putative uncharacterized protein                                                                                               |
| Op0848r | Rmet_3015 | <i>hmzS</i>  | 0.48 | 2.64  | Q1LIY8 Sensor protein                                                                                                                 |
| Op0848r | Rmet_3016 | <i>hmzR</i>  | 0.25 | 3.62  | Q1LIY7 Two component transcriptional regulator, winged helix family                                                                   |
| Op0848r | Rmet_3017 | -            | 0.26 | 2.03  | Q1LIY6 Ferric reductase-like transmembrane component-like                                                                             |
| Op0848r | Rmet_3018 | <i>virD2</i> | 0.37 | 2.26  | Q1LIY5 Putative uncharacterized protein                                                                                               |
| Op0848r | Rmet_3019 | -            | 1.00 | 0.01  | Q1LIY4 Putative uncharacterized protein                                                                                               |
| Op0848r | Rmet_3020 | <i>traF</i>  | 0.68 | 0.96  | Q1LIY3 TraF peptidase. Serine peptidase. MEROPS family S26C                                                                           |
| Op0848r | Rmet_3021 | -            | 0.41 | 1.39  | A0HB67 Putative uncharacterized protein                                                                                               |
| Op0848r | Rmet_3022 | <i>parG</i>  | 0.44 | 1.58  | Q1LIY1 Putative uncharacterized protein                                                                                               |
| Op0848r | Rmet_3023 | <i>parA</i>  | 0.61 | 1.89  | A0HB69 Cobyrinic acid a,c-diamide synthase<br>A9BTU5 Conserved hypothetical replication initiator and transcription repressor protein |
| Op0848r | Rmet_3024 | <i>repA</i>  | 0.87 | 0.61  | repressor protein                                                                                                                     |
| Op0848r | Rmet_3025 | -            | 0.27 | 1.51  | Q1LIX8 Putative uncharacterized protein                                                                                               |
| Op0848r | Rmet_3026 | -            | 0.52 | 0.82  | A9BTV1 Putative uncharacterized protein                                                                                               |
| Op0848r | Rmet_3027 | -            | 0.23 | 3.86  | A9BTV2 Putative lipoprotein                                                                                                           |
| Op0849f | Rmet_3028 | -            | 0.07 | 12.79 | A9BTV3 Helix-turn-helix domain protein                                                                                                |
| Op0850r | Rmet_3029 | -            | 0.43 | 3.32  | Q1LIX4 Putative uncharacterized protein                                                                                               |
| Op0850r | Rmet_3030 | -            | 0.15 | 7.09  | Q1LIX3 Putative uncharacterized protein                                                                                               |
| Op0851f | Rmet_3031 | -            | 0.17 | 3.16  | A9BTV5 GCN5-related N-acetyltransferase                                                                                               |
| Op0852r | Rmet_3032 | -            | 0.28 | 4.14  | A9BTV6 Putative uncharacterized protein                                                                                               |
| Op0852r | Rmet_3033 | <i>parB</i>  | 0.85 | 0.74  | A9BTV7 ParB domain protein nuclease                                                                                                   |

|         |           |              |             |       |                                           |
|---------|-----------|--------------|-------------|-------|-------------------------------------------|
| Op0852r | Rmet_3034 | <i>yupB</i>  | 0.61        | 1.39  | A9BTV8 Putative uncharacterized protein   |
| Op0853f | Rmet_3035 |              | 0.65        | 5.14  | pseudo                                    |
| Op0853f | Rmet_3036 |              | 0.61        | 0.72  | B2UA43 Putative uncharacterized protein   |
| Op0854r | Rmet_3037 |              | <b>0.32</b> | 2.74  | Q1LIW7 Putative uncharacterized protein   |
| Op0854r | Rmet_3038 |              | 0.62        | 3.27  | B2UA41 Putative uncharacterized protein   |
| Op0854r | Rmet_3039 |              | <b>0.06</b> | 12.37 | B2UA40 Putative uncharacterized protein   |
| Op0854r | Rmet_3040 |              | <b>0.14</b> | 3.09  | Q1LIW4 UBA/THIF-type NAD/FAD binding fold |
| Op0854r | Rmet_3041 |              | <b>0.05</b> | 6.72  | A9BTW5 Putative uncharacterized protein   |
| Op0855f | Rmet_3042 |              | <b>0.00</b> | 15.97 | Q1LIW2 Putative uncharacterized protein   |
| Op0855f | Rmet_3043 |              | <b>0.10</b> | 8.00  | B2UA36 Putative uncharacterized protein   |
| Op0856r | Rmet_3044 |              | <b>0.01</b> | 7.42  | A9BTW8 Putative uncharacterized protein   |
| Op0856r | Rmet_3045 | <i>int</i>   | <b>0.20</b> | 4.74  | Q1LIV9 Phage integrase                    |
| Op0856r | Rmet_3046 | <i>maeB1</i> | <b>0.47</b> | 4.29  | Q1LIV8 Malic enzyme, NAD-binding          |

### Region 3 = CMGI-2

|         |           |              |             |      |                                                             |
|---------|-----------|--------------|-------------|------|-------------------------------------------------------------|
| Op0366r | Rmet_1274 |              | <b>0.48</b> | 1.24 | Q1LNW7 Transposase IS66                                     |
| Op0366r | Rmet_1275 |              | 0.72        | 0.80 | Q1LNW6 IS66 Orf2 like                                       |
| Op0366r | Rmet_1276 |              | 0.60        | 0.77 | Q1LNW5 Putative uncharacterized protein                     |
| Op0366r | Rmet_1277 |              | <b>0.31</b> | 1.93 | Q1LNW4 ATPase component ABC-type multidrug transport system |
| Op0367f | Rmet_1278 |              | <b>0.22</b> | 1.13 | Q1LNW3 Transposase                                          |
| Op0368r | Rmet_1279 |              | <b>0.28</b> | 3.44 | Q1LNW2 Putative transposase                                 |
| Op0369f | Rmet_1280 | <i>tnpA</i>  | <b>0.15</b> | 5.58 | Q1LNW1 Integrase, catalytic region                          |
| Op0370r | Rmet_1281 | <i>hypE1</i> | <b>0.21</b> | 4.05 | Q1LNW0 Hydrogenase expression/formation protein HypE        |
| Op0370r | Rmet_1282 | <i>hypD1</i> | 0.55        | 4.07 | Q1LNV9 Hydrogenase expression/formation protein HypD        |
| Op0370r | Rmet_1283 | <i>hypC1</i> | <b>0.17</b> | 2.60 | Q1LNV8 Hydrogenase assembly chaperone hypC/hupF             |
| Op0370r | Rmet_1284 | <i>hyoF1</i> | 0.65        | 1.79 | Q1LNV7 Hydrogenase maturation protein hypF                  |
| Op0370r | Rmet_1285 | <i>hypB1</i> | <b>0.12</b> | 2.06 | Q1LNV6 Hydrogenase accessory protein HypB                   |
| Op0370r | Rmet_1286 | <i>hypA1</i> | <b>0.37</b> | 1.43 | Q1LNV5 Hydrogenase nickel insertion protein HypA            |
| Op0370r | Rmet_1287 | <i>hoxV</i>  | 0.71        | 0.97 | Q1LNV4 Putative uncharacterized protein                     |
| Op0370r | Rmet_1288 |              | <b>0.09</b> | 5.22 | Q1LNV3 HupJ, contains rubredoxin domain                     |
| Op0370r | Rmet_1289 |              | <b>0.16</b> | 5.13 | Q1LNV2 Rubredoxin                                           |
| Op0370r | Rmet_1290 | <i>hoxQ</i>  | <b>0.07</b> | 9.33 | Q1LNV1 HupH hydrogenase expression protein                  |
| Op0370r | Rmet_1291 |              | <b>0.14</b> | 4.47 | Q1LNV0 Hydrogenase-1 expression HyaE                        |
| Op0370r | Rmet_1292 | <i>hypC2</i> | <b>0.28</b> | 5.01 | Q1LNU9 Hydrogenase assembly chaperone hypC/hupF             |

|         |           |             |      |      |                                                                         |
|---------|-----------|-------------|------|------|-------------------------------------------------------------------------|
| Op0370r | Rmet_1293 | -           | 0.13 | 2.48 | Q1LNU8 HyaD peptidase. Aspartic peptidase. MEROPS family A31            |
| Op0370r | Rmet_1294 | -           | 0.16 | 3.61 | Q1LNU7 Putative plasmid maintenance system antidote protein, XRE family |
| Op0370r | Rmet_1295 | -           | 0.03 | 4.15 | Q1LNU6 Nickel-dependent hydrogenase b-type cytochrome subunit           |
| Op0370r | Rmet_1296 | <i>hupE</i> | 0.06 | 7.77 | Q1LNU5 HupE/UreJ protein                                                |
| Op0370r | Rmet_1297 | <i>hoxG</i> | 0.05 | 4.48 | Q1LNU4 Nickel-dependent hydrogenase, large subunit                      |
| Op0370r | Rmet_1298 | <i>hoxK</i> | 0.01 | 6.37 | Q1LNU3 Hydrogenase (NiFe) small subunit (HydA)                          |
| Op0371f | Rmet_1299 | -           | 0.83 | 1.23 | Q1LNU2 Putative uncharacterized protein                                 |
| Op0372r | Rmet_1300 | -           | 0.38 | 1.71 | Q1LNU1 GMC oxidoreductase                                               |
| Op0373f | Rmet_1301 | <i>tnpA</i> | 1.10 | 0.58 | Q1LNU1 Integrase, catalytic region                                      |
| Op0374r | Rmet_1302 | -           | 0.29 | 4.74 | Q1LNT9 Putative transposase                                             |
| Op0374r | Rmet_1303 | -           | 0.28 | 2.81 | Q1LNT8 Transposase IS3/IS911                                            |
| Op0375f | Rmet_1304 | -           | 0.37 | 2.06 | Q1LNT7 Putative uncharacterized protein                                 |
| Op0376r | Rmet_1305 | <i>patR</i> | 0.19 | 2.32 | Q1LNT6 Sigma-54 factor, interaction region                              |
| Op0376r | Rmet_1306 | -           | 0.34 | 4.95 | A4JW31 Alpha/beta hydrolase fold                                        |
| Op0376r | Rmet_1307 | -           | 0.63 | 1.74 | Q1LNT4 Membrane protein involved in aromatic hydrocarbon degradation    |
| Op0376r | Rmet_1308 | -           | 0.32 | 1.70 | Q1LNT3 Alcohol dehydrogenase GroES-like protein                         |
| Op0376r | Rmet_1309 | -           | 0.21 | 3.07 | not annotated                                                           |
| Op0376r | Rmet_1310 | -           | 0.42 | 1.51 | not annotated                                                           |
| Op0376r | Rmet_1311 | -           | 0.48 | 1.87 | Q1LNT2 Oxidoreductase FAD-binding region                                |
| Op0376r | Rmet_1312 | <i>tmoE</i> | 0.59 | 1.30 | Q1LNT1 Methane/phenol/toluene hydroxylase                               |
| Op0376r | Rmet_1313 | <i>tmoD</i> | 0.24 | 5.40 | Q1LNT0 Monooxygenase component MmoB/DmpM                                |
| Op0376r | Rmet_1314 | <i>tmoC</i> | 0.20 | 7.77 | Q1LNS9 Rieske (2Fe-2S) region                                           |
| Op0376r | Rmet_1315 | <i>tmoB</i> | 0.13 | 3.30 | Q1LNS8 Toluene-4-monooxygenase system B                                 |
| Op0376r | Rmet_1316 | <i>tmoA</i> | 0.19 | 4.91 | Q1LNS7 Methane/phenol/toluene hydroxylase                               |
| Op0376r | Rmet_1317 | <i>nahJ</i> | 0.42 | 1.37 | Q1LNS6 4-oxalocrotonate tautomerase family enzyme                       |
| Op0376r | Rmet_1318 | <i>dmpH</i> | 0.15 | 3.27 | Q1LNS5 Hydratase/decarboxylase                                          |
| Op0376r | Rmet_1319 | <i>mhpE</i> | 0.54 | 2.02 | Q1LNS4 Pyruvate carboxyltransferase                                     |
| Op0376r | Rmet_1320 | <i>mhpF</i> | 0.61 | 1.24 | Q1LNS3 Semialdehyde dehydrogenase, NAD-binding                          |
| Op0376r | Rmet_1321 | -           | 0.50 | 1.71 | Q1LNS2 Hydratase/decarboxylase                                          |
| Op0376r | Rmet_1322 | <i>dmpC</i> | 0.46 | 2.42 | Q1LNS1 Aldehyde dehydrogenase                                           |
| Op0376r | Rmet_1323 | -           | 0.62 | 1.68 | Q1LNS0 Putative uncharacterized protein                                 |
| Op0376r | Rmet_1324 | <i>dmpB</i> | 0.31 | 1.97 | Q1LNR9 Catechol 2,3-dioxygenase                                         |
| Op0376r | Rmet_1325 | <i>hcaD</i> | 0.31 | 2.28 | Q1LNR8 Ferredoxin                                                       |

|         |           |              |      |      |                                                |
|---------|-----------|--------------|------|------|------------------------------------------------|
| Op0376r | Rmet_1326 | -            | 0.58 | 1.26 | Q1LNR7 Oxidoreductase FAD-binding region       |
| Op0376r | Rmet_1327 | -            | 0.09 | 3.26 | Q9ANX1 TomA4                                   |
| Op0376r | Rmet_1328 | <i>tomA3</i> | 0.07 | 5.40 | Q1LNR5 Methane/phenol/toluene hydroxylase      |
| Op0376r | Rmet_1329 | -            | 0.31 | 3.54 | Q1LNR4 Monooxygenase component MmoB/DmpM       |
| Op0376r | Rmet_1330 | -            | 0.37 | 1.62 | Q1LNR3 Methane/phenol/toluene hydroxylase      |
| Op0376r | Rmet_1331 | -            | 0.26 | 2.51 | Q1LNR2 Phenol hydroxylase subunit              |
| Op0377f | Rmet_1332 | -            | 0.24 | 5.61 | Q1LNR1 Putative uncharacterized protein        |
| Op0377f | Rmet_1333 | <i>phaB2</i> | 0.08 | 6.16 | Q1LNR0 Acetoacetyl-CoA reductase               |
| Op0377f | Rmet_1334 | -            | 0.37 | 1.56 | Q1LNQ9 UspA                                    |
| Op0377f | Rmet_1335 | <i>chnA</i>  | 0.12 | 7.40 | Q1LNQ8 Short-chain dehydrogenase/reductase SDR |
| Op0377f | Rmet_1336 | -            | 0.11 | 4.77 | Q1LNQ7 Transcriptional regulator, LysR family  |
| Op0377f | Rmet_1337 | -            | 0.15 | 6.06 | Q1LNQ6 Putative lipoprotein                    |
| Op0378r | Rmet_1338 | -            | 0.28 | 3.05 | Q1LNQ5 Putative uncharacterized protein        |

#### Region 4

|         |           |              |      |       |                                                                                 |
|---------|-----------|--------------|------|-------|---------------------------------------------------------------------------------|
| Op1698f | Rmet_5689 | <i>pilY1</i> | 0.07 | 23.92 | Q1LBC8 Putative type 4 fimbrial biogenesis pily1-related protein signal peptide |
| Op1698f | Rmet_5690 | -            | 0.05 | 11.37 | Q1LBC7 Putative lipoprotein                                                     |
| Op1700f | Rmet_5692 | -            | 0.41 | 1.88  | Q1LBC5 Putative uncharacterized protein                                         |
| Op1700f | Rmet_5693 | -            | 0.22 | 3.43  | Q1LBC4 Putative uncharacterized protein                                         |
| Op1701r | Rmet_5694 | -            | 0.32 | 2.41  | Q1LBC3 Putative uncharacterized protein                                         |
| Op1702f | Rmet_5695 | -            | 0.16 | 3.46  | Q1LBC2 Beta-lactamase-like protein                                              |
| Op1702f | Rmet_5696 | -            | 0.16 | 3.10  | Q1LBC1 Putative uncharacterized protein                                         |
| Op1703r | Rmet_5697 | -            | 0.39 | 1.73  | Q1LBC0 Putative uncharacterized protein                                         |
| Op1704f | Rmet_5698 | -            | 0.37 | 3.61  | Q1LBB9 Putative uncharacterized protein                                         |
| Op1708f | Rmet_5710 | <i>bvgS1</i> | 0.48 | 2.06  | Q1LBA7 Sensor protein                                                           |
| Op1709r | Rmet_5714 | <i>bvgA</i>  | 0.22 | 7.17  | Q1LBA3 Two component transcriptional regulator, LuxR family                     |
| Op1709r | Rmet_5715 | -            | 0.12 | 4.25  | Q1LBA2 Putative uncharacterized protein                                         |
| Op1710f | Rmet_5716 | -            | 0.12 | 2.33  | Q1LBA1 Putative uncharacterized protein                                         |
| Op1714f | Rmet_5724 | -            | 0.26 | 4.85  | Q1LB93 Sensor protein                                                           |
| Op1715r | Rmet_5728 | -            | 0.16 | 2.33  | Q1LB89 Glycosyl transferase, group 1                                            |
| Op1715r | Rmet_5729 | -            | 0.25 | 5.76  | Q1LB88 Polysaccharide export protein                                            |
| Op1715r | Rmet_5730 | <i>kpsE</i>  | 0.23 | 2.73  | Q1LB87 Chain length determinant protein                                         |
| Op1715r | Rmet_5731 | <i>kpsT</i>  | 0.30 | 6.70  | Q1LB86 ABC transporter related                                                  |

|         |           |   |             |       |                                                               |
|---------|-----------|---|-------------|-------|---------------------------------------------------------------|
| Op1716f | Rmet_5735 | - | <b>0.38</b> | 1.67  | Q1LB82 KpsF/GutQ family protein                               |
| Op1716f | Rmet_5738 | - | <b>0.26</b> | 6.71  | Q1LB79 Putative uncharacterized protein                       |
| Op1716f | Rmet_5739 | - | <b>0.32</b> | 4.91  | Q1LB78 Putative uncharacterized protein                       |
| Op1717r | Rmet_5742 | - | <b>0.11</b> | 3.12  | Q1LB75 Putative uncharacterized protein                       |
| Op1717r | Rmet_5743 | - | <b>0.38</b> | 3.47  | Q1LB74 AMP-dependent synthetase and ligase                    |
| Op1718f | Rmet_5744 | - | <b>0.18</b> | 2.95  | Q1LB73 Putative uncharacterized protein                       |
| Op1718f | Rmet_5745 | - | <b>0.10</b> | 3.46  | Q1LB72 Putative uncharacterized protein                       |
| Op1720f | Rmet_5749 | - | <b>0.07</b> | 5.57  | Q1LB68 Transcriptional regulator, PadR family                 |
| Op1721r | Rmet_5750 | - | <b>0.25</b> | 4.09  | Q1LB67 Diguanylate cyclase/phosphodiesterase                  |
| Op1722f | Rmet_5751 | - | <b>0.25</b> | 2.12  | Q1LB66 Diguanylate cyclase (GGDEF domain) with PAS/PAC sensor |
| Op1723r | Rmet_5752 | - | <b>0.14</b> | 5.80  | Q1LB65 Putative uncharacterized protein                       |
| Op1724f | Rmet_5753 | - | <b>0.12</b> | 5.46  | Q1LB64 Putative uncharacterized protein                       |
| Op1724f | Rmet_5754 | - | <b>0.48</b> | 10.58 | Q1LB63 Fumarate hydratase, class II                           |

#### Region 5

|         |           |   |             |      |                                                   |
|---------|-----------|---|-------------|------|---------------------------------------------------|
| Op0034r | Rmet_0133 | - | <b>0.28</b> | 2.49 | Q1LS57 Nuclear export factor GLE1                 |
| Op0037f | Rmet_0137 | - | <b>0.36</b> | 1.42 | Q1LS53 Putative uncharacterized protein           |
| Op0038r | Rmet_0138 | - | <b>0.37</b> | 2.11 | Q1LS52 Transcriptional regulator, LysR family     |
| Op0038r | Rmet_0139 | - | <b>0.46</b> | 2.87 | Q1LS51 Putative uncharacterized protein           |
| Op0107f | Rmet_0392 | - | <b>0.45</b> | 1.08 | Q1LRE8 Twin-arginine translocation pathway signal |

#### Region 6 = CMGI-2

|         |           |             |             |       |                                              |
|---------|-----------|-------------|-------------|-------|----------------------------------------------|
| Op0357f | Rmet_1238 | <i>radC</i> | <b>0.35</b> | 0.86  | Q1LP02 DNA repair protein RadC               |
| Op0357f | Rmet_1239 | <i>int</i>  | <b>0.10</b> | 8.76  | Q1LP01 Phage integrase                       |
| Op0357f | Rmet_1240 | <i>int</i>  | <b>0.41</b> | 2.85  | Q1LP00 Phage integrase                       |
| Op0357f | Rmet_1241 | <i>ritC</i> | <b>0.27</b> | 5.52  | Q1LNZ9 Phage integrase                       |
| Op0357f | Rmet_1242 | <i>radC</i> | <b>0.06</b> | 16.41 | Q1LNZ8 RadC family protein                   |
| Op0357f | Rmet_1245 | <i>parB</i> | <b>0.21</b> | 3.31  | Q1LNZ5 ParB family protein                   |
| Op0358r | Rmet_1246 | -           | <b>0.44</b> | 2.88  | Q1LNZ4 GCN5-related N-acetyltransferase      |
| Op035xx | Rmet_1247 | -           | <b>0.29</b> | 3.32  | Q1LNZ3 Putative uncharacterized protein      |
| Op0359f | Rmet_1248 | -           | <b>0.13</b> | 7.64  | Q1LNZ2 Transcriptional regulator, XRE family |
| Op0363f | Rmet_1255 | -           | <b>0.48</b> | 2.76  | Q1LNY5 Putative uncharacterized protein      |
| Op0363f | Rmet_1259 | <i>virD</i> | <b>0.45</b> | 1.57  | Q1LNY1 Putative uncharacterized protein      |
| Op0364r | Rmet_1264 | -           | <b>0.14</b> | 3.57  | Q1LNX7 Integrase, catalytic region           |



|               |           |               |      |      |                                                                             |
|---------------|-----------|---------------|------|------|-----------------------------------------------------------------------------|
| Op0364r       | Rmet_1266 | -             | 0.43 | 4.14 | Q1LNX5 Beta-lactamase-like protein                                          |
| Op0365f       | Rmet_1271 | <i>ritA</i>   | 0.48 | 0.90 | Q1LNX0 Phage integrase                                                      |
| Op0365f       | Rmet_1272 | <i>int</i>    | 0.39 | 3.82 | Q1LNW9 Phage integrase                                                      |
| Op0365f       | Rmet_1273 | <i>int</i>    | 0.38 | 2.27 | Q1LNW8 Phage integrase                                                      |
| <b>others</b> |           |               |      |      |                                                                             |
| Op0153f       | Rmet_0550 | -             | 0.19 | 0.50 | Q1LQZ0 Putative uncharacterized protein                                     |
| <b>CMGI-2</b> |           |               |      |      |                                                                             |
| Op0379f       | Rmet_1350 | <i>virB10</i> | 0.16 | 5.63 | Q1LNP3 Conjugation TrbI-like protein                                        |
| Op0379f       | Rmet_1351 | -             | 0.15 | 7.48 | Q1LNP2 Putative uncharacterized protein                                     |
| <b>CMGI-3</b> |           |               |      |      |                                                                             |
| Op0413f       | Rmet_1475 | -             | 0.28 | 7.53 | Q1LNB8 Putative uncharacterized protein                                     |
| Op0415f       | Rmet_1477 | <i>yupB</i>   | 0.45 | 0.96 | Q1LNB6 Putative uncharacterized protein                                     |
| Op0417f       | Rmet_1480 | -             | 0.40 | 5.38 | Q1LNB3 Putative uncharacterized protein                                     |
| Op0431f       | Rmet_1560 | -             | 0.25 | 7.14 | Q1LN33 Putative uncharacterized protein                                     |
| Op0565f       | Rmet_1934 | -             | 0.41 | 1.38 | Q1LM13 Binding-protein-dependent transport systems inner membrane component |
| <b>CMGI-1</b> |           |               |      |      |                                                                             |
| Op0663f       | Rmet_2354 | -             | 0.47 | 1.55 | Q8GQ64 Putative uncharacterized protein ORF C46                             |
| Op0698r       | Rmet_2529 | -             | 0.39 | 0.98 | Q1LKC0 Thiolase                                                             |
| Op0716r       | Rmet_2579 | -             | 0.27 | 1.55 | Q1LK70 Pirin-like protein                                                   |
| Op0802r       | Rmet_2848 | -             | 0.41 | 1.84 | Q1LJF5 Putative uncharacterized protein                                     |
| <b>CMGI-4</b> |           |               |      |      |                                                                             |
| Op0842r       | Rmet_2987 | -             | 0.40 | 3.67 | Q1LJ16 Putative uncharacterized protein                                     |
| Op0842r       | Rmet_2993 | <i>ptxC</i>   | 0.37 | 4.26 | A0HB23 Phosphonate ABC transporter, inner membrane subunit                  |
| Op0843f       | Rmet_2996 | -             | 0.25 | 2.66 | A0HB26 Transcriptional regulator, LysR family                               |
| Op0843f       | Rmet_2997 | -             | 0.25 | 4.63 | A9BTQ2 Putative uncharacterized protein                                     |
| Op0878r       | Rmet_3138 | -             | 0.24 | 0.43 | Q1LIL6 2-nonaprenyl-3-methyl-6-methoxy-1,4-benzoquinol hydroxylase          |
| Op1148f       | Rmet_4084 | <i>phoA1</i>  | 0.47 | 0.68 | Q1LFX5 Alkaline phosphatase                                                 |
| Op1219r       | Rmet_4291 | -             | 0.45 | 1.30 | Q1LFB9 2,3-dimethylmalate lyase                                             |
| Op1314f       | Rmet_4565 | -             | 0.14 | 1.63 | Q1LEJ9 TonB-dependent receptor                                              |
| Op1315r       | Rmet_4566 | -             | 0.17 | 1.68 | Q1LEJ8 Putative uncharacterized protein                                     |
| Op1327r       | Rmet_4607 | -             | 0.28 | 1.26 | Q1LEF7 TonB-dependent copper receptor                                       |
| Op1327r       | Rmet_4608 | -             | 0.46 | 1.07 | Q1LEF6 Putative uncharacterized protein                                     |

Op1521r Rmet\_5171 - **0.50** 1.60 Q1LCU6 Cold-shock DNA-binding protein family

---

<sup>a</sup>Cells of wild type strain CH34(pMOL28, pMOL30) and its plasmid-free derivative strain AE104 were cultivated in TMM minerals salts medium without further additions on gluconate to the exponential phase of growth. RNA was isolated, reversely transcribed, labeled and hybridized against a CH34-specific gene array. Provided are the Q-ratios AE104/CH34, red if at least 2-fold down-regulated, green up, bold-faced letters indicate significant differences, letters in italics not significant differences. The D-value for each comparison is also given. This is the distance of both mean values divided by the sum of both deviations. If  $D > 1$  (the deviation bars do not touch or overlap) the data points are different with a probability in the t-test of  $> 95\%$ . Three biological repeats for both strains. Genes associated to catabolic metabolic genomic islands (CMGIs) are on a yellow ground with the CMGI number directly above the respective gene(s), operon regions are in a box.

**Supplementary Table S3. Genes expressed differently in AE104 in the presence of 100  $\mu$ M Zn(II)<sup>a</sup>**

| Operon                    | Region    | Name        | Gene | Q_AE104_Zn  | D     | Description                                             |
|---------------------------|-----------|-------------|------|-------------|-------|---------------------------------------------------------|
| <b>Up-regulated genes</b> |           |             |      |             |       |                                                         |
| Op0027f                   | Rmet_0094 | -           |      | <b>2.10</b> | 4.17  | Q1LS96 Putative uncharacterized protein                 |
| Op0033f                   | Rmet_0131 | -           |      | <b>2.22</b> | 4.11  | Q1LS59 ATP-dependent protease hslV                      |
| Op0033f                   | Rmet_0132 | <i>hslU</i> |      | <b>2.29</b> | 4.53  | Q1LS58 Heat shock protein HslVU, ATPase subunit HslU    |
| Op0039f                   | Rmet_0144 | -           |      | <b>2.03</b> | 2.02  | Q1LS46 Methionine biosynthesis MetW                     |
| Op0043f                   | Rmet_0151 | -           |      | <b>2.62</b> | 3.17  | Q1LS39 Patatin                                          |
| Op0052r                   | Rmet_0175 | -           |      | <b>2.49</b> | 4.45  | Q1LS15 5-formyltetrahydrofolate cyclo-ligase            |
| Op0066r                   | Rmet_0227 | -           |      | <b>2.09</b> | 5.04  | Q1LRW3 Ferredoxin-like protein                          |
| Op0078r                   | Rmet_0272 | -           |      | <b>2.64</b> | 9.15  | Q1LRR8 RNA polymerase sigma factor                      |
| Op0080r                   | Rmet_0277 | <i>nasF</i> |      | <b>2.40</b> | 0.76  | Q1LRR3 Putative nitrate transporter protein             |
| Op0083f                   | Rmet_0282 | -           |      | <b>2.16</b> | 3.97  | Q1LRQ8 Peptidase M16-like protein                       |
| Op0083f                   | Rmet_0283 | -           |      | <b>2.41</b> | 5.70  | Q1LRQ7 Peptidase M16-like protein                       |
| Op0103f                   | Rmet_0369 | -           |      | <b>2.01</b> | 3.30  | Q1LRH1 ABC transporter-like protein                     |
| Op0103f                   | Rmet_0372 | -           |      | <b>2.04</b> | 6.87  | Q1LRG8 Import inner membrane translocase, subunit Tim44 |
| Op0103f                   | Rmet_0379 | -           |      | <b>2.03</b> | 6.25  | Q1LRG1 Putative transmembrane protein                   |
| Op0151f                   | Rmet_0543 | -           |      | <b>3.01</b> | 0.50  | Q1LQZ7 Ferredoxin                                       |
| Op0151f                   | Rmet_0545 | -           |      | <b>3.26</b> | 0.57  | Q1LQZ5 Alcohol dehydrogenase, zinc-binding              |
| Op0153f                   | Rmet_0550 | -           |      | <b>6.66</b> | 0.64  | Q1LQZ0 Putative uncharacterized protein                 |
| Op0222r                   | Rmet_0778 | -           |      | <b>3.08</b> | 4.58  | Q1LQB2 RNase G                                          |
| Op0243f                   | Rmet_0849 | -           |      | <b>2.29</b> | 7.96  | Q1LQ41 17 kDa surface antigen                           |
| Op0270r                   | Rmet_0967 | <i>gstI</i> |      | <b>2.08</b> | 3.17  | Q1LPS3 Glutathione S-transferase-like protein           |
| Op0287f                   | Rmet_1004 | -           |      | <b>2.07</b> | 6.26  | Q1LPN6 GrpE protein                                     |
| Op0287f                   | Rmet_1005 | -           |      | <b>2.14</b> | 6.22  | Q1LPN5 Putative thioredoxin protein                     |
| Op0295f                   | Rmet_1024 | -           |      | <b>3.26</b> | 7.83  | Q1LPL6 Transcriptional regulator, BadM/Rrf2 family      |
| Op0295f                   | Rmet_1025 | <i>iscS</i> |      | <b>4.22</b> | 10.12 | Q1LPL5 Cysteine desulfurase IscS                        |
| Op0295f                   | Rmet_1026 | -           |      | <b>4.14</b> | 16.89 | Q1LPL4 FeS cluster assembly scaffold IscU               |
| Op0295f                   | Rmet_1027 | -           |      | <b>4.06</b> | 8.15  | Q1LPL3 Iron-sulfur cluster assembly protein IscA        |
| Op0295f                   | Rmet_1028 | <i>hscB</i> |      | <b>3.10</b> | 7.35  | Q1LPL2 Co-chaperone Hsc20                               |
| Op0295f                   | Rmet_1029 | <i>hscA</i> |      | <b>2.97</b> | 3.68  | Q1LPL1 Chaperone protein hscA homolog                   |
| Op0295f                   | Rmet_1030 | -           |      | <b>2.84</b> | 7.59  | Q1LPL0 Ferredoxin, 2Fe-2S type                          |

|                |           |              |              |       |                                                                                                                 |
|----------------|-----------|--------------|--------------|-------|-----------------------------------------------------------------------------------------------------------------|
| Op0295f        | Rmet_1031 | -            | <b>2.61</b>  | 5.89  | Q1LPK9 Putative uncharacterized protein                                                                         |
| Op0357f        | Rmet_1242 | -            | <b>2.62</b>  | 2.25  | Q1LNZ8 RadC family protein                                                                                      |
| Op0363f        | Rmet_1255 | -            | <b>2.18</b>  | 2.76  | Q1LNY5 Putative uncharacterized protein                                                                         |
| <b>Op0370r</b> | Rmet_1298 | <i>hoxK</i>  | <b>2.29</b>  | 1.40  | Q1LNU3 Hydrogenase (NiFe) small subunit (HydA)                                                                  |
| Op0376r        | Rmet_1315 | <i>tmoB</i>  | <b>2.53</b>  | 1.25  | Q1LNS8 Toluene-4-monooxygenase system B                                                                         |
| Op0376r        | Rmet_1318 | <i>dmpH</i>  | <b>3.95</b>  | 1.19  | Q1LNS5 Hydratase/decarboxylase                                                                                  |
| Op0376r        | Rmet_1324 | <i>dmpB</i>  | <b>2.10</b>  | 0.59  | Q1LNR9 Catechol 2,3-dioxygenase                                                                                 |
| Op0379f        | Rmet_1350 | <i>trbI</i>  | <b>2.71</b>  | 1.75  | Q1LNP3 Conjugation TrbI-like protein                                                                            |
| <b>Op0425f</b> | Rmet_1510 | <i>cbbE1</i> | <b>2.31</b>  | 1.72  | Q1LN83 Ribulose-5-phosphate 3-epimerase                                                                         |
| <b>Op0425f</b> | Rmet_1512 | <i>cbbP</i>  | <b>2.43</b>  | 0.83  | Q1LN81 Phosphoribulokinase                                                                                      |
| <b>Op0425f</b> | Rmet_1518 | <i>cbbA2</i> | <b>2.26</b>  | 0.56  | Q1LN75 Fructose-bisphosphate aldolase                                                                           |
| Op0539f        | Rmet_1864 | -            | <b>2.15</b>  | 4.37  | Q1LM83 UPF0061 protein Rmet_1864                                                                                |
| Op0539f        | Rmet_1865 | -            | <b>2.33</b>  | 5.50  | Q1LM82 Methionine sulfoxide reductase B                                                                         |
| Op0560r        | Rmet_1920 | -            | <b>2.17</b>  | 1.50  | Q1LM27 Isochorismatase hydrolase<br>Q1LM13 Binding-protein-dependent transport systems inner membrane component |
| Op0565f        | Rmet_1934 | -            | <b>2.19</b>  | 0.57  |                                                                                                                 |
| Op0574r        | Rmet_1959 | -            | <b>2.04</b>  | 4.13  | Q1LLY8 ATPase AAA-2                                                                                             |
| Op0609f        | Rmet_2111 | -            | <b>2.37</b>  | 6.64  | Q1LLI6 Putative uncharacterized protein                                                                         |
| Op0621f        | Rmet_2149 | -            | <b>2.21</b>  | 0.53  | Q1LLE8 Beta-lactamase-like protein                                                                              |
| Op0626r        | Rmet_2177 | <i>ppx</i>   | <b>3.58</b>  | 2.88  | Q1LLC0 Ppx/GppA phosphatase                                                                                     |
| Op0627f        | Rmet_2178 | <i>ppk</i>   | <b>4.28</b>  | 5.76  | Q1LLB9 Polyphosphate kinase                                                                                     |
| Op0628r        | Rmet_2181 | -            | <b>6.00</b>  | 7.60  | Q1LLB6 Phosphate uptake regulator, PhoU                                                                         |
| Op0628r        | Rmet_2182 | <i>pstB</i>  | <b>6.21</b>  | 5.97  | Q1LLB5 Phosphate import ATP-binding protein pstB                                                                |
| Op0628r        | Rmet_2183 | <i>pstA</i>  | <b>6.64</b>  | 4.14  | Q1LLB4 Phosphate transport system permease protein 2                                                            |
| Op0628r        | Rmet_2184 | <i>pstC</i>  | <b>5.88</b>  | 3.12  | Q1LLB3 Phosphate ABC transporter, permease protein PstC                                                         |
| Op0628r        | Rmet_2185 | <i>pstS</i>  | <b>10.26</b> | 5.66  | Q1LLB2 Periplasmic phosphate binding protein                                                                    |
| Op0651f        | Rmet_2280 | -            | <b>2.35</b>  | 13.55 | Q1LL17 Putative uncharacterized protein                                                                         |
| Op0656r        | Rmet_2299 | -            | <b>12.67</b> | 8.21  | Q8GQ11 Putative integral membrane protein / transporter                                                         |
| Op0659f        | Rmet_2303 | <i>cadA</i>  | <b>18.85</b> | 5.09  | A7HYL0 Heavy metal translocating P-type ATPase                                                                  |
| Op0659f        | Rmet_2304 | <i>pbrC2</i> | <b>22.96</b> | 5.39  | Q8GQ15 Lipoprotein signal peptidase                                                                             |
| Op0659f        | Rmet_2305 | -            | <b>4.42</b>  | 3.49  | Q8GQ16 Putative uncharacterized protein ORF C95                                                                 |
| Op0661f        | Rmet_2317 | -            | <b>2.42</b>  | 3.27  | Q1LKY2 Transposase Tn3                                                                                          |
| Op0663f        | Rmet_2354 | -            | <b>2.04</b>  | 1.16  | Q8GQ64 Putative uncharacterized protein ORF C46                                                                 |
| Op0669f        | Rmet_2372 | -            | <b>2.69</b>  | 4.34  | Q8GQ82 Putative uncharacterized protein ORF C28                                                                 |

|         |           |             |               |       |                                                                             |
|---------|-----------|-------------|---------------|-------|-----------------------------------------------------------------------------|
| Op0669f | Rmet_2373 | -           | <b>2.99</b>   | 3.19  | Q8GQ83 Putative uncharacterized protein ORF C27                             |
| Op0669f | Rmet_2374 | -           | <b>2.51</b>   | 6.62  | Q1LKS5 Putative uncharacterized protein                                     |
| Op0694r | Rmet_2505 | -           | <b>2.12</b>   | 1.19  | Q1LKE4 Uracil-DNA glycosylase superfamily                                   |
| Op0719f | Rmet_2583 | <i>phoD</i> | <b>2.65</b>   | 1.86  | Q1LK66 Alkaline phosphatase                                                 |
| Op0741f | Rmet_2636 | -           | <b>2.09</b>   | 8.53  | Q1LK13 Thioredoxin                                                          |
| Op0742r | Rmet_2637 | -           | <b>2.31</b>   | 3.65  | Q1LK12 Hemerythrin-like, metal-binding                                      |
| Op0785f | Rmet_2793 | -           | <b>2.87</b>   | 12.22 | Q1LJL0 Putative uncharacterized protein                                     |
| Op0804r | Rmet_2853 | -           | <b>2.25</b>   | 1.16  | Q1LJF0 Putative uncharacterized protein                                     |
| Op0826r | Rmet_2922 | <i>dnaK</i> | <b>2.46</b>   | 3.04  | O33522 Chaperone protein dnaK                                               |
| Op0843f | Rmet_2997 | -           | <b>3.87</b>   | 6.72  | A9BTQ2 Putative uncharacterized protein                                     |
| Op0845f | Rmet_2999 | -           | <b>2.67</b>   | 1.97  | Q1LDD1 Propeptide, PepSY amd peptidase M4                                   |
| Op0845f | Rmet_3000 | -           | <b>2.82</b>   | 1.99  | Q1LDD2 Undecaprenyl-diphosphatase (Phosphoesterase, PA-phosphatase related) |
| Op0845f | Rmet_3001 | -           | <b>3.27</b>   | 4.91  | Q1LDD3 Putative uncharacterized protein                                     |
| Op0845f | Rmet_3002 | -           | <b>2.73</b>   | 3.14  | Q1LDD4 Conserved hypothetical signal peptide protein                        |
| Op0855f | Rmet_3042 | -           | <b>2.36</b>   | 0.99  | Q1LIW2 Putative uncharacterized protein                                     |
| Op0878r | Rmet_3138 | -           | <b>5.84</b>   | 0.62  | Q1LIL6 2-nonaprenyl-3-methyl-6-methoxy-1,4-benzoquinol hydroxylase          |
| Op0947f | Rmet_3407 | -           | <b>5.87</b>   | 8.05  | Q1LHU7 Glycosyl transferase, family 2                                       |
| Op0947f | Rmet_3408 | -           | <b>14.33</b>  | 6.58  | Q1LHU6 Radical SAM                                                          |
| Op0947f | Rmet_3409 | -           | <b>12.20</b>  | 4.92  | Q1LHU5 YdjC-like protein                                                    |
| Op0947f | Rmet_3410 | -           | <b>11.76</b>  | 4.23  | Q1LHU4 Putative uncharacterized protein                                     |
| Op0948r | Rmet_3411 | -           | <b>13.88</b>  | 4.33  | Q1LHU3 Uncharacterized protein UPF0065                                      |
| Op0950r | Rmet_3430 | -           | <b>2.00</b>   | 10.45 | Q1LHS4 UPF0102 protein Rmet_3430                                            |
| Op0962r | Rmet_3456 | -           | <b>2.91</b>   | 5.45  | Q1LHP8 Transcriptional regulator, MerR family                               |
| Op0970r | Rmet_3501 | -           | <b>2.15</b>   | 3.50  | Q1LHK3 ATP synthase I chain                                                 |
| Op0975f | Rmet_3525 | -           | <b>2.45</b>   | 8.67  | Q1LHH9 Heavy metal transport/detoxification protein                         |
| Op1008f | Rmet_3620 | <i>degP</i> | <b>118.07</b> | 8.38  | Q1LH84 Peptidase degP, priplasmic protease                                  |
| Op1008f | Rmet_3621 | -           | <b>5.87</b>   | 6.03  | Q1LH83 Putative uncharacterized protein                                     |
| Op1009r | Rmet_3622 | -           | <b>2.10</b>   | 2.44  | Q1LH82 Major facilitator superfamily MFS_1                                  |
| Op1025r | Rmet_3677 | -           | <b>2.47</b>   | 4.36  | Q1LH27 Nucleoid protein H-NS                                                |
| Op1040f | Rmet_3728 | -           | <b>2.40</b>   | 0.83  | Q1LGX6 Acyl-CoA dehydrogenase-like protein                                  |
| Op1064f | Rmet_3826 | -           | <b>3.21</b>   | 3.23  | Q1LGN0 Putative uncharacterized protein                                     |
| Op1091r | Rmet_3903 | -           | <b>2.13</b>   | 2.84  | Q1LGF5 Putative uncharacterized protein                                     |

|         |           |               |              |      |                                                                             |
|---------|-----------|---------------|--------------|------|-----------------------------------------------------------------------------|
| Op1092f | Rmet_3904 | -             | <b>2.38</b>  | 3.93 | Q1LGF4 Putative serine protein kinase, PrkA                                 |
| Op1092f | Rmet_3905 | -             | <b>2.17</b>  | 2.16 | Q1LGF3 Putative uncharacterized protein                                     |
| Op1092f | Rmet_3906 | -             | <b>2.28</b>  | 2.78 | Q1LGF2 SpoVR                                                                |
| Op1132f | Rmet_4025 | -             | <b>4.52</b>  | 4.89 | Q1LG33 Major facilitator superfamily MFS_1                                  |
| Op1133r | Rmet_4026 | -             | <b>25.48</b> | 6.52 | Q1LG32 Putative periplasmic ligand-binding sensor protein                   |
| Op1134f | Rmet_4027 | -             | <b>2.92</b>  | 3.64 | Q1LG31 Proline iminopeptidase                                               |
| Op1134f | Rmet_4028 | -             | <b>2.66</b>  | 6.07 | Q1LG30 Putative uncharacterized protein                                     |
| Op1148f | Rmet_4084 | <i>phoA1</i>  | <b>6.21</b>  | 1.66 | Q1LFX5 Alkaline phosphatase                                                 |
| Op1148f | Rmet_4085 | <i>phoA2</i>  | <b>2.94</b>  | 2.48 | Q1LFX4 Alkaline phosphatase                                                 |
| Op1148f | Rmet_4086 | -             | <b>2.66</b>  | 2.98 | Q1LFX3 Putative signal peptide protein                                      |
| Op1199r | Rmet_4230 | -             | <b>2.37</b>  | 1.94 | Q1LFI0 Two component transcriptional regulator, LuxR family                 |
| Op1202f | Rmet_4245 | -             | <b>2.72</b>  | 5.36 | Q1LFG5 Transcriptional regulator, LysR family                               |
| #NV     | Rmet_4246 | #NV           | <b>2.51</b>  | 4.85 | Q1LFG4 Putative uncharacterized protein                                     |
| Op1217r | Rmet_4284 | -             | <b>2.10</b>  | 5.27 | Q1LFC6 Entericidin EcnAB                                                    |
| Op1219r | Rmet_4290 | -             | <b>2.10</b>  | 2.11 | Q1LFC0 Transcriptional regulator, AraC family                               |
| Op1298f | Rmet_4537 | <i>serA2</i>  | <b>2.74</b>  | 3.57 | Q1LEM4 D-isomer specific 2-hydroxyacid dehydrogenase, NAD-binding           |
| Op1318f | Rmet_4583 | -             | <b>2.24</b>  | 3.76 | Q1LEI1 Extracellular solute-binding protein, family 3                       |
| Op1320f | Rmet_4593 | -             | <b>2.06</b>  | 6.14 | Q1LEH1 Polysaccharide deacetylase                                           |
| Op1321r | Rmet_4594 | <i>zntA</i>   | <b>15.61</b> | 7.79 | Q1LEH0 Heavy metal translocating P-type ATPase                              |
| Op1322f | Rmet_4595 | <i>czcI2</i>  | <b>4.28</b>  | 6.74 | Q1LEG9 Putative uncharacterized protein                                     |
| Op1322f | Rmet_4596 | <i>czcC2</i>  | <b>6.01</b>  | 5.24 | Q1LEG8 Outer membrane efflux protein                                        |
| Op1322f | Rmet_4597 | <i>czcB2'</i> | <b>4.99</b>  | 6.01 | Q1LEG7 Secretion protein HlyD                                               |
| Op1323r | Rmet_4598 | -             | <b>3.66</b>  | 3.14 | B1LRU9 Tn3 family transposase                                               |
| Op1398f | Rmet_4807 | -             | <b>3.85</b>  | 7.37 | Q1LDV7 Putative uncharacterized protein                                     |
| Op1409r | Rmet_4834 | -             | <b>2.08</b>  | 5.63 | Q1LDT0 Porin, Gram-negative type                                            |
| Op1412f | Rmet_4839 | -             | <b>4.20</b>  | 3.01 | Q1LDS5 Transcriptional regulator, LacI family                               |
| Op1412f | Rmet_4840 | -             | <b>2.52</b>  | 4.30 | Q1LDS4 Putative periplasmic solute-binding protein                          |
| Op1412f | Rmet_4841 | -             | <b>2.40</b>  | 3.49 | Q1LDS3 Binding-protein-dependent transport systems inner membrane component |
| Op1412f | Rmet_4843 | -             | <b>2.10</b>  | 3.56 | Q1LDS1 ABC transporter related                                              |
| Op1452f | Rmet_4942 | <i>gabD</i>   | <b>2.30</b>  | 4.44 | Q1LDH2 Succinate semialdehyde dehydrogenase                                 |
| Op1469r | Rmet_5005 | -             | <b>2.15</b>  | 4.66 | Q1LDA9 Isochorismatase hydrolase                                            |
| Op1509r | Rmet_5122 | <i>phaC3</i>  | <b>2.42</b>  | 5.24 | Q1LCZ5 Poly-beta-hydroxybutyrate polymerase-like protein                    |

|                             |           |              |              |       |                                                                                                   |
|-----------------------------|-----------|--------------|--------------|-------|---------------------------------------------------------------------------------------------------|
| Op1509r                     | Rmet_5123 | <i>phaB3</i> | <b>2.23</b>  | 8.42  | Q1LCZ4 3-oxoacyl-[acyl-carrier-protein] reductase                                                 |
| Op1509r                     | Rmet_5124 | -            | <b>2.49</b>  | 7.74  | Q1LCZ3 Putative uncharacterized protein                                                           |
| Op1540f                     | Rmet_5223 | -            | <b>2.16</b>  | 4.57  | Q1LCP4 Putative uncharacterized protein                                                           |
| Op1571r                     | Rmet_5319 | -            | <b>2.49</b>  | 7.21  | Q1LCE8 Heavy metal efflux pump CzcA                                                               |
| Op1571r                     | Rmet_5320 | -            | <b>2.44</b>  | 5.05  | Q1LCE7 Secretion protein HlyD<br>Q1LCE6 RND efflux system, outer membrane lipoprotein,            |
| Op1572f                     | Rmet_5321 | -            | <b>2.37</b>  | 8.97  | NodT                                                                                              |
| Op1573r                     | Rmet_5322 | -            | <b>2.36</b>  | 4.09  | Q1LCE5 Sensor protein                                                                             |
| Op1575r                     | Rmet_5324 | -            | <b>2.45</b>  | 1.32  | Q1LCE3 Putative signal peptide protein                                                            |
| Op1576f                     | Rmet_5325 | -            | <b>4.10</b>  | 6.84  | Q1LCE2 Putative uncharacterized protein<br>Q1LCE1 Two component transcriptional regulator, winged |
| Op1576f                     | Rmet_5326 | -            | <b>2.52</b>  | 3.78  | helix family                                                                                      |
| Op1576f                     | Rmet_5327 | -            | <b>3.05</b>  | 11.89 | Q1LCE0 Sensor protein                                                                             |
| Op1607r                     | Rmet_5395 | -            | <b>2.22</b>  | 2.09  | Q1LC72 Putative uncharacterized protein                                                           |
| Op1620f                     | Rmet_5450 | -            | <b>2.07</b>  | 1.12  | Q1LC17 Putative uncharacterized protein                                                           |
| Op1629r                     | Rmet_5485 | -            | <b>2.84</b>  | 6.55  | Q1LBY2 Putative uncharacterized protein                                                           |
| Op1662f                     | Rmet_5582 | -            | <b>2.16</b>  | 12.21 | Q1LBN5 Putative membrane protein                                                                  |
| Op1695r                     | Rmet_5668 | -            | <b>2.69</b>  | 3.77  | Q1LBE9 Copper resistance D                                                                        |
| Op1695r                     | Rmet_5670 | -            | <b>2.66</b>  | 2.31  | Q1LBE7 Copper resistance B<br>Q1LBE5 Two component heavy metal response                           |
| Op1696f                     | Rmet_5672 | <i>copR2</i> | <b>2.18</b>  | 2.52  | transcriptional regulator, winged helix family                                                    |
| Op1696f                     | Rmet_5673 | <i>copS2</i> | <b>2.12</b>  | 3.36  | Q1LBE4 Sensor protein                                                                             |
| Op1710f                     | Rmet_5716 | -            | <b>2.65</b>  | 7.02  | Q1LBA1 Putative uncharacterized protein                                                           |
| Op1715r                     | Rmet_5728 | -            | <b>2.39</b>  | 0.49  | Q1LB89 Glycosyl transferase, group 1                                                              |
| Op1718f                     | Rmet_5746 | <i>furB</i>  | <b>2.05</b>  | 1.15  | Q1LB71 Ferric uptake regulator, Fur family                                                        |
| Op1747r                     | Rmet_5801 | <i>zwf</i>   | <b>2.28</b>  | 5.11  | Q1LB16 Glucose-6-phosphate 1-dehydrogenase                                                        |
| Op1748f                     | Rmet_5802 | <i>edd1</i>  | <b>2.61</b>  | 3.82  | Q1LB15 6-phosphogluconate dehydratase                                                             |
| Op1749r                     | Rmet_5803 | -            | <b>2.90</b>  | 7.40  | Q1LB14 MscS Mechanosensitive ion channel                                                          |
| Op1755r                     | Rmet_5814 | -            | <b>2.35</b>  | 4.21  | Q1LB03 Putative uncharacterized protein                                                           |
| Op1766f                     | Rmet_5846 | -            | <b>2.11</b>  | 3.74  | Q1LAX1 Putative uncharacterized protein                                                           |
| <b>Down-regulated genes</b> |           |              |              |       |                                                                                                   |
| Op0007f                     | Rmet_0025 | -            | <b>-0.06</b> | 0.58  | Q1LSG5 Putative uncharacterized protein                                                           |
| Op0019f                     | Rmet_0062 | -            | <b>0.43</b>  | 3.25  | Q1LSC8 Putative uncharacterized protein                                                           |

|         |           |              |                |       |                                                                                         |
|---------|-----------|--------------|----------------|-------|-----------------------------------------------------------------------------------------|
| Op0019f | Rmet_0063 | -            | <b>0.29</b>    | 3.33  | Q1LSC7 Allophanate hydrolase subunit 2                                                  |
| Op0019f | Rmet_0064 | -            | <b>0.39</b>    | 3.76  | Q1LSC6 UPF0271 protein Rmet_0064                                                        |
| Op0019f | Rmet_0065 | -            | <b>0.42</b>    | 4.07  | Q1LSC5 Putative uncharacterized protein                                                 |
| Op0019f | Rmet_0066 | -            | <b>0.47</b>    | 2.96  | Q1LSC4 Putative uncharacterized protein                                                 |
| Op0019f | Rmet_0067 | -            | <b>0.49</b>    | 5.02  | Q1LSC3 Pyroglutamyl-peptidase I. Cysteine peptidase.<br>MEROPS family C15               |
| Op0033f | Rmet_0130 | -            | <b>0.27</b>    | 11.54 | Q1LS60 Uncharacterized protein UPF0065                                                  |
| Op0051f | Rmet_0170 | <i>ahcY</i>  | <b>0.44</b>    | 6.33  | Q1LS20 Adenosylhomocysteinase                                                           |
| Op0051f | Rmet_0171 | -            | <b>0.42</b>    | 4.85  | Q1LS19 Putative uncharacterized protein                                                 |
| Op0051f | Rmet_0173 | -            | <b>0.48</b>    | 2.82  | Q1LS17 TfoX-like protein                                                                |
| Op0057f | Rmet_0188 | -            | <b>0.38</b>    | 2.47  | Q1LS02 Pilus assembly protein                                                           |
| Op0057f | Rmet_0189 | -            | <b>0.40</b>    | 2.34  | Q1LS01 Type-4 fimbrial biogenesis pilV transmembrane protein                            |
| Op0057f | Rmet_0190 | -            | <b>0.39</b>    | 2.17  | Q1LS00 Type-4 fimbrial biogenesis transmembrane protein                                 |
| Op0057f | Rmet_0191 | -            | <b>0.36</b>    | 3.49  | Q1LRZ9 Putative type-4 fimbrial biogenesis transmembrane protein                        |
| Op0057f | Rmet_0192 | -            | <b>0.45</b>    | 3.40  | Q1LRZ8 Putative type-4 fimbrial biogenesis pily1-related protein                        |
| Op0057f | Rmet_0193 | -            | <b>0.45</b>    | 3.66  | Q1LRZ7 Pilus assembly protein PilE                                                      |
| Op0085f | Rmet_0294 | -            | <b>0.36</b>    | 3.29  | Q1LRP6 Putative uncharacterized protein                                                 |
| Op0109f | Rmet_0400 | <i>gltJ</i>  | <b>0.46</b>    | 4.34  | Q1LRE0 Amino acid ABC transporter, permease protein, 3-TM region, His/Glu/Gln/Arg/opine |
| Op0109f | Rmet_0402 | <i>gltL</i>  | <b>0.48</b>    | 4.44  | Q1LRD8 ABC transporter-related protein                                                  |
| Op0140r | Rmet_0522 | -            | <b>0.35</b>    | 3.29  | Q1LR18 Putative uncharacterized protein                                                 |
| Op0182r | Rmet_0657 | -            | <b>-126.85</b> | 0.52  | Q1LQN3 Putative membrane protein                                                        |
| Op0197f | Rmet_0700 | <i>dadA2</i> | <b>0.40</b>    | 4.82  | Q1LQJ0 FAD dependent oxidoreductase                                                     |
| Op0201f | Rmet_0709 | -            | <b>0.42</b>    | 3.94  | Q1LQI1 Putative uncharacterized protein                                                 |
| Op0207f | Rmet_0733 | -            | <b>-0.13</b>   | 0.59  | Q1LQF7 Histone deacetylase superfamily                                                  |
| Op0224r | Rmet_0789 | -            | <b>0.00</b>    | 0.58  | Q1LQA1 Uncharacterized protein UPF0065                                                  |
| Op0256r | Rmet_0879 | -            | <b>-0.29</b>   | 0.53  | Q1LQ11 Putative uncharacterized protein                                                 |
| Op0265f | Rmet_0920 | -            | <b>0.47</b>    | 3.03  | Q1LPX0 Putative transporter signal peptide protein                                      |
| Op0271f | Rmet_0970 | <i>ggt</i>   | <b>0.41</b>    | 4.88  | Q1LPS0 Gamma-glutamyltransferase 1. Threonine peptidase.<br>MEROPS family T03           |
| Op0290r | Rmet_1011 | -            | <b>0.05</b>    | 0.58  | Q1LPM9 Alpha/beta hydrolase fold                                                        |



|         |           |              |              |       |                                                                                |
|---------|-----------|--------------|--------------|-------|--------------------------------------------------------------------------------|
| Op0321f | Rmet_1123 | -            | <b>-0.56</b> | 0.59  | Q1LPB7 Extracellular solute-binding protein, family 3                          |
| Op0340r | Rmet_1177 | -            | <b>0.21</b>  | 0.56  | Q1LP63 Putative uncharacterized protein                                        |
| Op0342r | Rmet_1184 | -            | <b>0.49</b>  | 3.80  | Q1LP56 Uncharacterized protein UPF0065                                         |
| Op0346r | Rmet_1195 | -            | <b>0.49</b>  | 2.91  | Q1LP45 Sensor protein                                                          |
| Op0355f | Rmet_1225 | -            | <b>0.35</b>  | 17.27 | Q1LP15 Alpha/beta hydrolase fold                                               |
| Op0355f | Rmet_1226 | -            | <b>0.41</b>  | 6.03  | Q1LP14 Extracellular ligand-binding receptor                                   |
| Op0355f | Rmet_1227 | -            | <b>0.34</b>  | 10.81 | Q1LP13 Inner-membrane translocator                                             |
| Op0355f | Rmet_1228 | -            | <b>0.45</b>  | 4.52  | Q1LP12 Inner-membrane translocator                                             |
| Op0355f | Rmet_1229 | <i>livG6</i> | <b>0.48</b>  | 4.22  | Q1LP11 ABC transporter-related protein                                         |
| Op0355f | Rmet_1231 | -            | <b>0.46</b>  | 6.90  | Q1LP09 Probable potassium transport system protein kup                         |
| Op0370r | Rmet_1285 | -            | <b>0.49</b>  | 0.93  | Q1LNV6 Hydrogenase accessory protein HypB                                      |
| Op0427f | Rmet_1533 | -            | <b>0.04</b>  | 0.58  | Q1LN60 High-affinity nickel-transporter                                        |
| Op0450r | Rmet_1612 | -            | <b>0.38</b>  | 5.21  | B2UH78 Integrase catalytic region                                              |
| Op0455f | Rmet_1628 | -            | <b>0.26</b>  | 6.73  | Q1LMW5 Porin, Gram-negative type                                               |
| Op0456r | Rmet_1629 | -            | <b>0.49</b>  | 3.61  | Q1LMW4 Glutathione-dependent formaldehyde-activating, GFA                      |
| Op0486r | Rmet_1720 | -            | <b>0.15</b>  | 0.54  | Q1LMM5 Transcriptional regulator, lclR family                                  |
| Op0538r | Rmet_1862 | -            | <b>0.42</b>  | 6.31  | Q1LM85 Extracellular ligand-binding receptor                                   |
| Op0568r | Rmet_1943 | -            | <b>-2.10</b> | 0.64  | Q1LM04 Secretion protein HlyD                                                  |
| Op0596r | Rmet_2052 | <i>ugpC</i>  | <b>0.46</b>  | 4.71  | Q1LLP5 sn-glycerol-3-phosphate import ATP-binding protein<br>ugpC              |
| Op0596r | Rmet_2053 | <i>ugpE</i>  | <b>0.47</b>  | 2.10  | Q1LLP4 Binding-protein-dependent transport systems inner<br>membrane component |
| Op0596r | Rmet_2055 | <i>ugpB</i>  | <b>0.49</b>  | 9.43  | Q1LLP2 Extracellular solute-binding protein, family 1                          |
| Op0630r | Rmet_2205 | -            | <b>0.01</b>  | 0.58  | Q1LL92 Lytic transglycosylase, catalytic                                       |
| Op0655f | Rmet_2294 | -            | <b>0.01</b>  | 0.58  | Q8GQ06 Putative uncharacterized protein ORF C105                               |
| Op0680r | Rmet_2429 | <i>fabD</i>  | <b>0.30</b>  | 0.62  | Q1LKM0 [Acyl-carrier-protein] S-malonyltransferase                             |
| Op0695f | Rmet_2515 | -            | <b>0.49</b>  | 2.93  | Q1LKD4 L-lactate transport                                                     |
| Op0729f | Rmet_2605 | -            | <b>0.01</b>  | 0.58  | Q1LK44 2-nitropropane dioxygenase, NPD                                         |
| Op0775f | Rmet_2752 | -            | <b>0.17</b>  | 3.79  | Q1LJQ1 Tripartite ATP-independent periplasmic transporter,<br>DctQ component   |
| Op0775f | Rmet_2753 | -            | <b>0.22</b>  | 4.79  | Q1LJQ0 TRAP C4-dicarboxylate transport system permease<br>DctM subunit         |
| Op0806r | Rmet_2864 | <i>livG2</i> | <b>0.42</b>  | 2.91  | Q1LJD9 ABC transporter-related protein                                         |

|         |           |              |              |       |                                                      |
|---------|-----------|--------------|--------------|-------|------------------------------------------------------|
| Op0806r | Rmet_2865 | <i>livM2</i> | <b>0.36</b>  | 3.94  | Q1LJD8 Inner-membrane translocator                   |
| Op0806r | Rmet_2866 | <i>livH2</i> | <b>0.30</b>  | 3.31  | Q1LJD7 Inner-membrane translocator                   |
| Op0806r | Rmet_2867 | <i>livK2</i> | <b>0.34</b>  | 6.86  | Q1LJD6 Extracellular ligand-binding receptor         |
| Op0813f | Rmet_2894 | -            | <b>0.30</b>  | 13.64 | Q1LJA9 Cold-shock DNA-binding protein family         |
| Op0879f | Rmet_3139 | -            | <b>0.10</b>  | 6.12  | Q1LIL5 Putative uncharacterized protein              |
| Op0881f | Rmet_3144 | -            | <b>0.07</b>  | 7.66  | Q1LIL0 Porin, Gram-negative type                     |
| Op0900r | Rmet_3199 | -            | <b>0.03</b>  | 0.58  | Q1LIF5 Conserved hypothetical transmembrane protein  |
| Op0918r | Rmet_3234 | -            | <b>0.33</b>  | 10.96 | Q1LIC0 Porin, Gram-negative type                     |
| Op0920r | Rmet_3262 | <i>gltD</i>  | <b>0.39</b>  | 8.85  | Q1LI92 Glutamate synthase (NADH) small subunit       |
| Op0920r | Rmet_3263 | <i>gltB</i>  | <b>-1.98</b> | 0.36  | Q1LI91 Glutamate synthase (NADH) large subunit       |
| Op0920r | Rmet_3269 | -            | <b>0.33</b>  | 2.77  | Q1LI85 Pilus assembly protein, PilQ                  |
| Op0920r | Rmet_3270 | -            | <b>0.30</b>  | 6.99  | Q1LI84 Pilus assembly protein, PilO                  |
| Op0920r | Rmet_3271 | -            | <b>0.32</b>  | 2.26  | Q1LI83 Fimbrial assembly                             |
| Op0920r | Rmet_3272 | -            | <b>0.34</b>  | 5.32  | Q1LI82 Type IV pilus assembly protein PilM           |
| Op0926r | Rmet_3309 | <i>rpmC</i>  | <b>0.49</b>  | 4.69  | Q1LI45 50S ribosomal protein L29                     |
| Op0926r | Rmet_3313 | <i>rpsS</i>  | <b>0.46</b>  | 3.43  | Q1LI41 30S ribosomal protein S19                     |
| Op0926r | Rmet_3318 | -            | <b>-3.29</b> | 0.53  | Q1LI36 Flavin reductase-like, FMN-binding            |
| Op0941f | Rmet_3389 | <i>gspL</i>  | <b>0.48</b>  | 5.08  | Q1LHW5 General secretion pathway L                   |
| Op0941f | Rmet_3390 | <i>gspM</i>  | <b>0.44</b>  | 6.68  | Q1LHW4 General secretion pathway M protein           |
| Op0941f | Rmet_3391 | -            | <b>0.16</b>  | 0.77  | Q1LHW3 Type II secretion system protein N            |
| Op0941f | Rmet_3392 | <i>gspD</i>  | <b>0.50</b>  | 4.62  | Q1LHW2 Type II and III secretion system protein      |
| Op0941f | Rmet_3393 | <i>gspE</i>  | <b>0.44</b>  | 5.87  | Q1LHW1 Type II secretion system protein E (GspE)     |
| Op0941f | Rmet_3394 | <i>gspF</i>  | <b>0.39</b>  | 5.46  | Q1LHW0 General secretion pathway protein F           |
| Op0974r | Rmet_3516 | <i>livM5</i> | <b>0.39</b>  | 5.26  | Q1LHI8 Inner-membrane translocator                   |
| Op0974r | Rmet_3517 | <i>livH5</i> | <b>0.26</b>  | 7.25  | Q1LHI7 Inner-membrane translocator                   |
| Op0974r | Rmet_3518 | -            | <b>0.21</b>  | 4.98  | Q1LHI6 Extracellular ligand-binding receptor         |
| Op0974r | Rmet_3519 | <i>livF5</i> | <b>0.40</b>  | 6.93  | Q1LHI5 ABC transporter-related protein               |
| Op0974r | Rmet_3520 | <i>livG5</i> | <b>0.21</b>  | 5.26  | Q1LHI4 ABC transporter-related protein               |
| Op0976r | Rmet_3526 | -            | <b>0.29</b>  | 5.52  | Q1LHH8 OmpW                                          |
| Op0983f | Rmet_3543 | -            | <b>0.36</b>  | 6.19  | Q1LHG1 Twin-arginine translocation pathway signal    |
| Op0985f | Rmet_3549 | <i>tctC</i>  | <b>0.19</b>  | 5.11  | Q1LHF5 Uncharacterized protein UPF0065               |
| Op0985f | Rmet_3550 | <i>tctB</i>  | <b>0.26</b>  | 5.34  | Q1LHF4 Conserved hypothetical membrane protein       |
| Op0985f | Rmet_3552 | -            | <b>-0.06</b> | 0.58  | Q1LHF2 Phenylacetic acid degradation-related protein |
| Op1026f | Rmet_3699 | <i>flhA</i>  | <b>0.48</b>  | 2.82  | Q1LH05 Flagellar biosynthesis protein FlhA           |

|         |           |              |              |       |                                                                             |
|---------|-----------|--------------|--------------|-------|-----------------------------------------------------------------------------|
| Op1042f | Rmet_3734 | <i>flgB</i>  | <b>0.42</b>  | 4.19  | Q1LGX0 Flagellar basal-body rod protein FlgB                                |
| Op1042f | Rmet_3735 | <i>flgC</i>  | <b>0.44</b>  | 3.30  | Q1LGW9 Flagellar basal-body rod protein FlgC                                |
| Op1042f | Rmet_3736 | <i>flgD</i>  | <b>0.44</b>  | 3.80  | Q1LGW8 Flagellar hook capping protein                                       |
| Op1066f | Rmet_3836 | -            | <b>0.41</b>  | 6.85  | Q1LGM0 Outer membrane efflux protein                                        |
| Op1066f | Rmet_3837 | -            | <b>0.36</b>  | 5.76  | Q1LGL9 Secretion protein HlyD                                               |
| Op1066f | Rmet_3838 | -            | <b>0.40</b>  | 5.00  | Q46VH3 Heavy metal efflux pump CzcA                                         |
| Op1086f | Rmet_3894 | -            | <b>0.35</b>  | 4.68  | Q1LGG4 Putative uncharacterized protein                                     |
| Op1088f | Rmet_3900 | -            | <b>0.38</b>  | 1.90  | Q1LGF8 Uncharacterized protein UPF0065                                      |
| Op1095r | Rmet_3913 | -            | <b>-0.08</b> | 0.58  | Q1LGE5 Uncharacterized protein UPF0065                                      |
| Op1115r | Rmet_3980 | <i>livH4</i> | <b>-0.02</b> | 0.57  | Q1LG78 Inner-membrane translocator                                          |
| Op1123r | Rmet_3998 | -            | <b>-0.06</b> | 0.59  | Q1LG60 Putative uncharacterized protein                                     |
| Op1128f | Rmet_4019 | <i>surE</i>  | <b>0.17</b>  | 0.54  | Q1LG39 Exopolyphosphatase / 3'-nucleotidase / 5'-nucleotidase               |
| Op1184f | Rmet_4188 | -            | <b>0.45</b>  | 5.60  | Q1LFM1 Transcriptional regulator, TetR family                               |
| Op1198f | Rmet_4222 | -            | <b>0.47</b>  | 12.52 | Q1LFI7 Transcriptional regulator, lclR family                               |
| Op1219r | Rmet_4287 | -            | <b>0.48</b>  | 2.52  | Q1LFC3 Rare lipoprotein A                                                   |
| Op1276f | Rmet_4477 | <i>livM3</i> | <b>0.37</b>  | 4.54  | Q1LET4 Inner-membrane translocator                                          |
| Op1305r | Rmet_4549 | <i>uvrA2</i> | <b>0.19</b>  | 0.56  | Q1LEL2 UvrA family protein                                                  |
| Op1314f | Rmet_4564 | <i>metE</i>  | <b>0.06</b>  | 17.81 | Q1LEK0 Methionine synthase (B12-independent)                                |
| Op1314f | Rmet_4565 | -            | <b>0.25</b>  | 1.22  | Q1LEJ9 TonB-dependent receptor                                              |
| Op1316f | Rmet_4575 | -            | <b>0.38</b>  | 1.19  | Q1LEI9 Acyl-CoA dehydrogenase-like protein                                  |
| Op1316f | Rmet_4576 | -            | <b>0.02</b>  | 0.58  | Q1LEI8 Binding-protein-dependent transport systems inner membrane component |
| Op1325r | Rmet_4605 | -            | <b>-0.11</b> | 0.59  | Q1LEF9 Sensor protein                                                       |
| Op1362f | Rmet_4721 | -            | <b>0.22</b>  | 4.10  | Q1LE43 Putative uncharacterized protein                                     |
| Op1377r | Rmet_4749 | -            | <b>0.32</b>  | 4.21  | Q46TY9 HU family DNA-binding protein                                        |
| Op1396f | Rmet_4796 | -            | <b>-2.33</b> | 0.68  | Q1LDW8 Rhs element Vgr protein                                              |
| Op1417r | Rmet_4857 | -            | <b>0.00</b>  | 0.58  | Q1LDQ7 Putative uncharacterized protein                                     |
| Op1431r | Rmet_4893 | -            | <b>0.49</b>  | 4.02  | Q1LDM1 Putative uncharacterized protein                                     |
| Op1446f | Rmet_4931 | -            | <b>0.48</b>  | 1.96  | Q1LDI3 Uncharacterized protein UPF0065                                      |
| Op1466f | Rmet_4994 | -            | <b>0.16</b>  | 5.62  | Q1LDC0 Porin, Gram-negative type                                            |
| Op1493r | Rmet_5073 | <i>metE</i>  | <b>0.17</b>  | 18.51 | Q1LD41 Putative uncharacterized protein                                     |
| Op1493r | Rmet_5074 | -            | <b>0.15</b>  | 10.79 | Q1LD40 NADPH-dependent FMN reductase                                        |
| Op1493r | Rmet_5075 | <i>msuE1</i> | <b>0.23</b>  | 8.46  | Q1LD39 Putative uncharacterized protein                                     |

|         |           |             |              |      |                                                     |
|---------|-----------|-------------|--------------|------|-----------------------------------------------------|
| Op1517r | Rmet_5152 | -           | <i>0.46</i>  | 0.77 | Q1LCW5 Acyl-CoA dehydrogenase-like protein          |
| Op1560f | Rmet_5288 | -           | <b>0.24</b>  | 7.17 | Q1LCH9 Porin, Gram-negative type                    |
| Op1566f | Rmet_5297 | -           | <b>0.44</b>  | 1.73 | Q1LCH0 Flagellar basal body-associated protein FliL |
| Op1566f | Rmet_5298 | <i>fliM</i> | <b>0.49</b>  | 1.44 | Q1LCG9 Flagellar motor switch protein FliM          |
| Op1566f | Rmet_5299 | <i>fliN</i> | <b>0.48</b>  | 1.96 | Q1LCG8 Flagellar motor switch FliN                  |
| Op1709r | Rmet_5713 | -           | <i>0.49</i>  | 0.88 | Q1LBA4 Hpt domain protein                           |
| Op1719r | Rmet_5748 | -           | <i>0.00</i>  | 0.58 | Q1LB69 Putative uncharacterized protein             |
| Op1740f | Rmet_5785 | -           | <i>-0.06</i> | 0.57 | Q1LB32 Putative uncharacterized protein             |
| Op1750f | Rmet_5807 | -           | <i>-0.01</i> | 0.58 | Q1LB10 TonB-dependent siderophore receptor          |
| Op1759r | Rmet_5821 | -           | <i>-0.04</i> | 0.58 | Q1LAZ6 Putative integrase/recombinase protein       |
| Op1778f | Rmet_5877 | -           | <b>0.25</b>  | 4.22 | Q1LAU0 Extracellular ligand-binding receptor        |
| Op1792f | Rmet_5907 | -           | <i>-0.01</i> | 0.58 | Q1LAR0 Putative uncharacterized protein             |

<sup>a</sup>Cells of strain AE104 was confronted with 100  $\mu$ M zinc chloride for 10 min or not, RNA was isolated, reversely transcribed, labeled and hybridized against a CH34-specific gene array. Provided are the Q-ratios  $\pm$ Zn for, red if at least 2-fold down-regulated, green up, bold-faced letters indicate significant differences, letters in italics not significant differences. The D-value for each comparison is also given. This is the distance of both mean values divided by the sum of both deviations. If  $D > 1$  (the deviation bars do not touch or overlap) the data points are different with a probability in the t-test of  $> 95\%$ . Three biological repeats. Genes in operon regions or adjacent operon regions are in a box. Regions with a gene up- or down-regulated at least four-fold are on a green ground. A yellow ground indicates genes of interest, e.g. hydrogenase genes.

Supplementary Table S4. Genes specifically up- or down-regulated in the comparison  $\Delta zupT/$ AE104 under EDTA and/or zinc stress<sup>a</sup>.

| Locus                        |              | Q( $\Delta zupT/$ AE104) |             |       |              |         | Description                                                                                                         |
|------------------------------|--------------|--------------------------|-------------|-------|--------------|---------|---------------------------------------------------------------------------------------------------------------------|
| Rmet                         | Gene         | Region <sup>b</sup>      | Q(Zn)       | D(Zn) | Q(EDTA)      | D(EDTA) |                                                                                                                     |
| <b>Q(EDTA)≥2</b>             |              |                          |             |       |              |         |                                                                                                                     |
| <b>Q(EDTA)≥2, Q(Zn)≤0.5.</b> |              |                          |             |       |              |         |                                                                                                                     |
| Rmet_1098                    |              | Op0317f                  | <b>0.48</b> | 2.94  | <b>17.91</b> | 16.54   | Q1LPE2 Cobalamin synthesis protein, P47K                                                                            |
| Rmet_1099                    |              | Op0317f                  | <b>0.35</b> | 3.02  | <b>22.52</b> | 52.14   | Q1LPE1 UPF0343 protein Rmet_1099                                                                                    |
| Rmet_1100                    | <i>cysS</i>  | Op0317f                  | <b>0.46</b> | 2.29  | <b>21.00</b> | 6.82    | Q1LPE0 Cysteinyl-tRNA synthetase                                                                                    |
| Rmet_1101                    |              | Op0317f                  | <b>0.49</b> | 2.84  | <b>14.38</b> | 4.34    | Q1LPD9 6-pyruvoyl-tetrahydropterin synthase-like protein<br>Q1LPD8 Carbonic anhydrases/acetyltransferase isoleucine |
| Rmet_1102                    |              | Op0317f                  | <b>0.40</b> | 1.69  | <b>15.38</b> | 3.83    | patch superfamily                                                                                                   |
| Rmet_1103                    | <i>allB</i>  | Op0317f                  | <b>0.49</b> | 3.91  | <b>13.61</b> | 6.60    | Q1LPD7 Dihydroorotase                                                                                               |
| Rmet_1104                    |              | Op0318r                  | <b>0.42</b> | 4.33  | <b>3.35</b>  | 8.54    | Q1LPD6 TonB-dependent siderophore receptor<br>Q58AN1 Mercury regulatory protein (Transcriptional                    |
| Rmet_5990                    |              | Op1825r                  | <b>0.50</b> | 1.67  | <b>2.83</b>  | 0.37    | regulator, MerR family)                                                                                             |
| <b>Q(EDTA)≥2, Q(Zn)≥2.</b>   |              |                          |             |       |              |         |                                                                                                                     |
| <b>CMGI-3</b>                |              |                          |             |       |              |         |                                                                                                                     |
| Rmet_1499                    | <i>cbbQ</i>  | Op0422r                  | <b>2.08</b> | 5.54  | <b>3.15</b>  | 1.89    | Q1LN94 ATPase associated with various cellular activities,<br>AAA_5                                                 |
| Rmet_1502                    |              | Op0423f                  | <b>4.28</b> | 6.65  | <b>3.05</b>  | 2.66    | Q1LN91 Transcriptional regulator, LysR family                                                                       |
| Rmet_1511                    | <i>cbbF2</i> | Op0425f                  | <b>4.16</b> | 11.31 | <b>2.61</b>  | 1.65    | Q1LN82 D-fructose 1,6-bisphosphatase                                                                                |
| Rmet_1521                    | <i>cbbI1</i> | Op0425f                  | <b>3.22</b> | 3.39  | <b>2.87</b>  | 1.20    | Q1LN72 Ribose-5-phosphate isomerase<br>Q1LN71 Respiratory-chain NADH dehydrogenase domain,                          |
| Rmet_1522                    | <i>hoxF</i>  | Op0425f                  | <b>4.18</b> | 2.94  | <b>2.84</b>  | 3.46    | 51 kDa subunit                                                                                                      |
| Rmet_1523                    | <i>hoxU</i>  | Op0425f                  | <b>6.99</b> | 4.38  | <b>5.85</b>  | 1.59    | Q1LN70 Ferredoxin                                                                                                   |
| Rmet_1524                    | <i>hoxY</i>  | Op0425f                  | <b>8.81</b> | 3.62  | <b>6.85</b>  | 1.37    | Q1LN69 NADH ubiquinone oxidoreductase, 20 kDa subunit                                                               |
| Rmet_1525                    | <i>hoxH</i>  | Op0425f                  | <b>7.85</b> | 2.73  | <b>6.77</b>  | 1.57    | Q1LN68 Nickel-dependent hydrogenase, large subunit                                                                  |
| Rmet_1526                    |              | Op0425f                  | <b>8.57</b> | 3.55  | <b>6.44</b>  | 1.80    | Q1LN67 HoxW protein<br>Q1LN66 Cyclic nucleotide-binding domain (CNMP-BD)                                            |
| Rmet_1527                    |              | Op0425f                  | <b>8.67</b> | 2.67  | <b>5.70</b>  | 1.55    | protein                                                                                                             |
| Rmet_1528                    |              | Op0425f                  | <b>4.17</b> | 3.70  | <b>2.38</b>  | 1.84    | Q1LN65 Alanine dehydrogenase/PNT-like protein                                                                       |
| Rmet_1533                    |              | Op0427f                  | <b>7.24</b> | 3.20  | <b>4.85</b>  | 1.55    | Q1LN60 High-affinity nickel-transporter                                                                             |

|           |         |       |       |      |      |                                                               |
|-----------|---------|-------|-------|------|------|---------------------------------------------------------------|
| Rmet_1534 | Op0427f | 11.16 | 3.60  | 4.92 | 2.68 | Q1LN59 Putative uncharacterized protein                       |
| Rmet_1535 | Op0427f | 11.88 | 9.49  | 5.14 | 3.42 | Q1LN58 Hydrogenase nickel insertion protein HypA              |
| Rmet_1536 | Op0427f | 10.59 | 14.26 | 5.67 | 5.50 | Q1LN57 Hydrogenase accessory protein HypB                     |
| Rmet_1537 | Op0427f | 9.31  | 7.74  | 4.98 | 1.85 | Q1LN56 (NiFe) hydrogenase maturation protein HypF             |
| Rmet_1538 | Op0427f | 8.36  | 7.75  | 4.24 | 4.77 | Q1LN55 Hydrogenase assembly chaperone hypC/hupF               |
| Rmet_1539 | Op0427f | 11.50 | 8.31  | 4.80 | 4.21 | Q1LN54 Hydrogenase expression/formation protein HypD          |
| Rmet_1540 | Op0427f | 11.83 | 11.02 | 5.08 | 7.40 | Q1LN53 Hydrogenase expression/formation protein HypE          |
| Rmet_1541 | Op0427f | 10.76 | 6.95  | 4.83 | 6.55 | Q1LN52 Formyl transferase-like protein                        |
| Rmet_1542 | Op0427f | 10.37 | 7.28  | 4.64 | 3.71 | Q1LN51 Response regulator receiver domain protein (CheY-like) |

|           |         |      |      |      |      |                                                                                   |
|-----------|---------|------|------|------|------|-----------------------------------------------------------------------------------|
| Rmet_6333 | Op1926f | 5.76 | 2.73 | 3.91 | 5.94 | Q1L9I4 Transposase Tn3<br>Q5NUU5 Hypothetical general secretion pathway protein A |
| Rmet_6338 | Op1926f | 3.57 | 2.82 | 2.72 | 3.74 | (ATPase) (                                                                        |

**Q(EDTA)≥2, Q(Zn) unchanged.**

| CMGI-3    |         |      |      |      |      |                                                          |
|-----------|---------|------|------|------|------|----------------------------------------------------------|
| Rmet_1498 | Op0422r | 1.69 | 1.34 | 2.27 | 3.81 | Q1LN95 von Willebrand factor, type A                     |
| Rmet_1517 | Op0425f | 1.66 | 1.01 | 2.51 | 1.70 | Q1LN76 HAD-superfamily hydrolase subfamily IA, variant 3 |
| Rmet_3842 | Op1067r | 1.46 | 0.35 | 3.02 | 0.55 | Q1LGL6 Putative uncharacterized protein                  |

**Q(EDTA)≤0.5**

**Q(EDTA)≤0.5, Q(Zn)≥2.**

| CMGI-1    |         |      |      |      |      |                                                 |
|-----------|---------|------|------|------|------|-------------------------------------------------|
| Rmet_2305 | Op0659f | 2.34 | 0.83 | 0.49 | 0.48 | Q8GQ16 Putative uncharacterized protein ORF C95 |

**Q(EDTA)≤0.5, Q(Zn)≤0.5.**

|           |              |      |      |      |       |                                                   |
|-----------|--------------|------|------|------|-------|---------------------------------------------------|
| Rmet_0005 | Op0002r      | 0.45 | 2.21 | 0.42 | 4.29  | Q1LSI5 Twin-arginine translocation pathway signal |
| Rmet_0007 | Op0002r      | 0.43 | 2.79 | 0.46 | 5.65  | Q1LSI3 Transcriptional regulator, AraC family     |
| Rmet_0022 | Op0004r      | 0.44 | 2.07 | 0.21 | 10.68 | Q1LSG8 Transcriptional regulator, AraC family     |
| Rmet_0086 | Op0024r      | 0.50 | 3.60 | 0.48 | 4.36  | Q1LSA4 Rhodanese-like protein                     |
| Rmet_0092 | Op0026r      | 0.33 | 1.83 | 0.12 | 11.12 | Q1LS98 Histidine kinase                           |
| Rmet_0093 | Op0027f      | 0.48 | 1.40 | 0.26 | 1.94  | Q1LS97 UPF0391 membrane protein Rmet_0093         |
| Rmet_0094 | Op0027f      | 0.44 | 1.64 | 0.29 | 2.26  | Q1LS96 Putative uncharacterized protein           |
| Rmet_0095 | Op0028r      | 0.33 | 1.43 | 0.14 | 4.68  | Q1LS95 Putative uncharacterized protein           |
| Rmet_0097 | Op0029f      | 0.47 | 4.00 | 0.47 | 2.56  | Q1LS93 Sporulation related                        |
| Rmet_0123 | Op0032r      | 0.44 | 1.64 | 0.48 | 2.39  | Q1LS67 TonB-dependent receptor                    |
| Rmet_0156 | metK Op0045f | 0.48 | 4.19 | 0.49 | 2.57  | Q1LS34 S-adenosylmethionine synthetase            |

|                  |                     |             |             |             |             |                                                                                                                    |
|------------------|---------------------|-------------|-------------|-------------|-------------|--------------------------------------------------------------------------------------------------------------------|
| Rmet_0157        | Op0045f             | <b>0.44</b> | 2.69        | <b>0.44</b> | 2.47        | Q1LS33 Putative uncharacterized protein                                                                            |
| Rmet_0160        | Op0048r             | <b>0.40</b> | 2.26        | <b>0.41</b> | 4.85        | Q1LS30 Methyl-accepting chemotaxis sensory transducer                                                              |
| <b>CMGI-7</b>    |                     |             |             |             |             |                                                                                                                    |
| <b>Rmet_0320</b> | <b>Op0092r</b>      | <b>0.46</b> | <b>2.26</b> | <b>0.41</b> | <b>7.60</b> | <b>Q5NUU5 Hypothetical general secretion pathway protein A (ATPase)</b>                                            |
| Rmet_0361        | Op0102r             | <b>0.45</b> | 1.65        | <b>0.48</b> | 1.24        | Q1LRH9 VWA containing CoxE-like protein<br>Q1LRH6 Xanthine dehydrogenase, molybdenum binding<br>subunit apoprotein |
| Rmet_0364        | Op0102r             | <b>0.39</b> | 1.42        | <b>0.19</b> | 10.43       |                                                                                                                    |
| Rmet_0366        | Op0103f             | <b>0.42</b> | 2.76        | <b>0.34</b> | 7.49        | Q1LRH4 Putative membrane protein<br>Q1LRG8 Import inner membrane translocase, subunit                              |
| Rmet_0372        | Op0103f             | <b>0.48</b> | 4.02        | <b>0.37</b> | 4.49        | Tim44                                                                                                              |
| Rmet_0393        | Op0107f             | <b>0.44</b> | 1.26        | <b>0.48</b> | 2.93        | Q1LRE7 ABC transporter-related protein                                                                             |
| Rmet_0409        | Op0112r             | <b>0.38</b> | 2.03        | <b>0.26</b> | 8.26        | Q1LRD0 50S ribosomal protein L13                                                                                   |
| Rmet_0410        | <i>rplM</i> Op0113f | <b>0.49</b> | 2.50        | <b>0.44</b> | 2.05        | Q1LRC9 30S ribosomal protein S9                                                                                    |
| Rmet_0412        | Op0113f             | <b>0.49</b> | 2.38        | <b>0.48</b> | 2.86        | Q1LRC7 Putative uncharacterized protein                                                                            |
| Rmet_0457        | Op0119f             | <b>0.34</b> | 1.72        | <b>0.43</b> | 1.75        | Q1LR83 Aminoglycoside phosphotransferase                                                                           |
| Rmet_0483        | Op0129f             | <b>0.42</b> | 1.93        | <b>0.42</b> | 5.41        | Q1LHY9 Integrase, catalytic region                                                                                 |
| Rmet_0485        | Op0129f             | <b>0.43</b> | 3.18        | <b>0.49</b> | 10.00       | Q1LR55 Putative uncharacterized protein<br>Q1LQY9 Hycolysin. Metallo peptidase. MEROPS family                      |
| Rmet_0551        | Op0153f             | <b>0.48</b> | 3.37        | <b>0.50</b> | 3.67        | M30                                                                                                                |
| Rmet_0585        | Op0165f             | <b>0.38</b> | 5.16        | <b>0.44</b> | 4.90        | Q1LQV5 Amidinotransferase                                                                                          |
| Rmet_0586        | <i>arcB</i> Op0165f | <b>0.45</b> | 2.06        | <b>0.38</b> | 4.46        | Q1LQV4 Ornithine cyclodeaminase                                                                                    |
| Rmet_0650        | Op0180r             | <b>0.27</b> | 1.02        | <b>0.48</b> | 2.59        | Q1LQP0 Peptidase A24A, prepilin type IV                                                                            |
| Rmet_0651        | Op0180r             | <b>0.38</b> | 4.44        | <b>0.50</b> | 5.38        | Q1LQN9 Flp/Fap pilin component                                                                                     |
| Rmet_0652        | Op0180r             | <b>0.32</b> | 2.96        | <b>0.43</b> | 5.86        | Q1LQN8 Flp/Fap pilin component                                                                                     |
| Rmet_0671        | <i>pill</i> Op0187f | <b>0.40</b> | 6.26        | <b>0.48</b> | 2.39        | Q1LQL9 CheW protein                                                                                                |
| Rmet_0744        | Op0210r             | <b>0.46</b> | 1.06        | <b>0.39</b> | 8.88        | Q1LQE6 TM2                                                                                                         |
| Rmet_0745        | Op0211f             | <b>0.34</b> | 0.96        | <b>0.30</b> | 8.89        | Q1LQE5 Putative uncharacterized protein                                                                            |
| Rmet_0751        | <i>rplS</i> Op0213f | <b>0.49</b> | 3.93        | <b>0.41</b> | 5.29        | Q1LQD9 50S ribosomal protein L19                                                                                   |
| Rmet_0795        | Op0226r             | <b>0.25</b> | 1.21        | <b>0.42</b> | 14.87       | Q1LQ95 Inner-membrane translocator<br>Q1LQ88 Glycine betaine/L-proline transport ATP binding<br>subunit            |
| Rmet_0802        | Op0227f             | <b>0.38</b> | 2.41        | <b>0.38</b> | 4.39        |                                                                                                                    |
| Rmet_0803        | Op0228r             | <b>0.34</b> | 2.42        | <b>0.25</b> | 3.36        | Q1LQ87 Putative uncharacterized protein                                                                            |
| Rmet_0804        | Op0228r             | <b>0.15</b> | 1.81        | <b>0.08</b> | 12.37       | Q1LQ86 SPFH domain, Band 7 family protein                                                                          |

|           |                     |             |       |             |       |                                                   |
|-----------|---------------------|-------------|-------|-------------|-------|---------------------------------------------------|
| Rmet_0805 | Op0228r             | <b>0.21</b> | 2.04  | <b>0.12</b> | 8.89  | Q1LQ85 Putative uncharacterized protein           |
| Rmet_0816 | Op0230r             | <b>0.47</b> | 2.59  | <b>0.45</b> | 8.60  | Q1LQ74 Putative transmembrane protein             |
| Rmet_0817 | Op0230r             | <b>0.46</b> | 1.56  | <b>0.34</b> | 10.80 | Q1LQ73 Putative uncharacterized protein           |
| Rmet_0821 | Op0232r             | <b>0.35</b> | 3.56  | <b>0.47</b> | 4.74  | Q1LQ69 Phenazine biosynthesis PhzC/PhzF protein   |
| Rmet_0861 | Op0247f             | <b>0.48</b> | 13.87 | <b>0.45</b> | 4.28  | Q1LQ29 Putative uncharacterized protein           |
| Rmet_0863 | Op0248r             | <b>0.41</b> | 2.45  | <b>0.14</b> | 14.25 | Q1LQ27 Putative uncharacterized protein           |
| Rmet_0864 | Op0249f             | <b>0.18</b> | 1.52  | <b>0.16</b> | 6.21  | Q1LQ26 Putative uncharacterized protein           |
| Rmet_0865 | Op0249f             | <b>0.14</b> | 1.84  | <b>0.16</b> | 8.21  | Q1LQ25 Putative uncharacterized protein           |
| Rmet_0872 | Op0253f             | <b>0.47</b> | 1.61  | <b>0.46</b> | 2.26  | Q1LQ18 Putative uncharacterized protein           |
|           |                     |             |       |             |       | Q1LQ17 Response regulator receiver domain protein |
| Rmet_0873 | Op0253f             | <b>0.46</b> | 2.70  | <b>0.46</b> | 6.18  | (CheY-like)                                       |
| Rmet_0880 | Op0256r             | <b>0.47</b> | 3.15  | <b>0.49</b> | 4.29  | Q1LQ10 Porin, gram-negative type                  |
| Rmet_0930 | <i>nuoD</i> Op0267f | <b>0.37</b> | 7.21  | <b>0.36</b> | 5.74  | Q1LPW0 NADH dehydrogenase I, D subunit            |
| Rmet_0933 | <i>nuoG</i> Op0267f | <b>0.50</b> | 3.46  | <b>0.42</b> | 8.79  | Q1LPV7 NADH-quinone oxidoreductase                |
| Rmet_0934 | <i>nuoH</i> Op0267f | <b>0.37</b> | 2.34  | <b>0.37</b> | 1.90  | Q1LPV6 NADH-quinone oxidoreductase subunit H      |
| Rmet_1026 | Op0295f             | <b>0.49</b> | 2.52  | <b>0.41</b> | 9.40  | Q1LPL4 FeS cluster assembly scaffold IscU         |
| Rmet_1141 | Op0326r             | <b>0.34</b> | 2.35  | <b>0.29</b> | 6.69  | Q1LP99 Transcriptional regulator, GntR family     |
| Rmet_1142 | Op0327f             | <b>0.36</b> | 2.67  | <b>0.44</b> | 2.59  | Q1LP98 Type IV pilus assembly PilZ                |
| Rmet_1161 | Op0333f             | <b>0.35</b> | 2.02  | <b>0.48</b> | 6.04  | Q1LP79 Translation initiation factor IF-3         |
| Rmet_1215 | Op0353f             | <b>0.48</b> | 3.49  | <b>0.34</b> | 4.32  | Q1LP25 Putative uncharacterized protein           |

### CMGI-2

|           |                    |             |       |             |      |                                         |
|-----------|--------------------|-------------|-------|-------------|------|-----------------------------------------|
| Rmet_1251 | Op0362r            | <b>0.44</b> | 2.23  | <b>0.30</b> | 3.88 | Q1LNY9 Putative uncharacterized protein |
| Rmet_1301 | Op0373f            | <b>0.32</b> | 2.93  | <b>0.19</b> | 4.85 | Q1LNW1 Integrase, catalytic region      |
| Rmet_1436 | <i>tsf</i> Op0403f | <b>0.34</b> | 11.22 | <b>0.43</b> | 3.43 | Q1LNF7 Elongation factor Ts             |

### CMGI-3

|           |         |             |      |             |       |                                                        |
|-----------|---------|-------------|------|-------------|-------|--------------------------------------------------------|
| Rmet_1465 | Op0411f | <b>0.47</b> | 2.16 | <b>0.34</b> | 3.41  | Q1LNC8 Phage integrase                                 |
| Rmet_1469 | Op0412r | <b>0.44</b> | 1.96 | <b>0.30</b> | 12.12 | Q1LNC4 TatD-related deoxyribonuclease                  |
| Rmet_1567 | Op0432r | <b>0.35</b> | 4.21 | <b>0.45</b> | 4.52  | Q1LN26 Transcriptional regulator, TetR family          |
| Rmet_1571 | Op0433f | <b>0.42</b> | 2.23 | <b>0.43</b> | 2.76  | Q1LN22 Putative uncharacterized protein                |
| Rmet_1573 | Op0433f | <b>0.39</b> | 2.17 | <b>0.32</b> | 5.39  | Q1LN20 tRNA-adenosine deaminase                        |
|           |         |             |      |             |       | Q46NG6 General substrate transporter:Major facilitator |
| Rmet_1728 | Op0489f | <b>0.40</b> | 2.25 | <b>0.31</b> | 3.54  | superfamily MFS_1                                      |
| Rmet_1932 | Op0565f | <b>0.42</b> | 2.70 | <b>0.39</b> | 4.55  | Q1LM15 Extracellular solute-binding protein, family 5  |
| Rmet_1936 | Op0565f | <b>0.38</b> | 2.05 | <b>0.34</b> | 7.08  | Q1LM11 Oligopeptide/dipeptide ABC transporter, ATP-    |



|           |             |         |      |      |      |       |                                                                                          |
|-----------|-------------|---------|------|------|------|-------|------------------------------------------------------------------------------------------|
| Rmet_1954 | <i>ispD</i> | Op0572r | 0.37 | 1.02 | 0.49 | 2.61  | binding protein<br>Q1LLZ3 2-C-methyl-D-erythritol 4-phosphate<br>cytidyltransferase      |
| Rmet_2067 |             | Op0600r | 0.48 | 5.60 | 0.48 | 5.33  | Q1LLN0 Polysaccharide deacetylase                                                        |
| Rmet_2081 |             | Op0601f | 0.42 | 4.26 | 0.48 | 3.09  | Q1LLL6 Transcriptional regulator, AsnC family                                            |
| Rmet_2131 |             | Op0614r | 0.48 | 2.69 | 0.36 | 5.04  | Q1LLG6 DNA helicase/exodeoxyribonuclease V, subunit A                                    |
| Rmet_2155 |             | Op0621f | 0.31 | 2.24 | 0.37 | 4.31  | Q1LLE2 Cytochrome c, class I                                                             |
| Rmet_2214 |             | Op0634r | 0.42 | 4.28 | 0.41 | 3.24  | Q1LL83 Putative uncharacterized protein                                                  |
| Rmet_2218 |             | Op0635f | 0.29 | 2.30 | 0.18 | 11.21 | Q1LL79 Luciferase-like protein                                                           |
| Rmet_2230 |             | Op0638r | 0.41 | 2.26 | 0.42 | 4.71  | Q1LL67 Putative integral membrane protein<br>Q1LL66 ABC transport systems inner membrane |
| Rmet_2231 |             | Op0638r | 0.24 | 3.11 | 0.19 | 18.42 | component<br>Q1LL65 ABC transport systems inner membrane                                 |
| Rmet_2232 |             | Op0638r | 0.37 | 1.97 | 0.46 | 2.60  | component                                                                                |

#### CMGI-1

|           |             |         |      |      |      |       |                                                 |
|-----------|-------------|---------|------|------|------|-------|-------------------------------------------------|
| Rmet_2271 |             | Op0649f | 0.48 | 5.00 | 0.42 | 11.21 | Q1LL26 Putative uncharacterized protein         |
| Rmet_2325 |             | Op0661f | 0.36 | 1.52 | 0.49 | 1.45  | Q1LKX4 Putative uncharacterized protein         |
| Rmet_2331 | <i>pilL</i> | Op0661f | 0.42 | 3.09 | 0.50 | 1.67  | Q1LKW8 Putative secreted protein                |
| Rmet_2332 |             | Op0661f | 0.39 | 2.38 | 0.41 | 3.13  | Q8GQ41 Putative uncharacterized protein ORF C69 |
| Rmet_2337 |             | Op0661f | 0.48 | 2.04 | 0.44 | 5.43  | A3LCI0 Putative uncharacterized protein         |
| Rmet_2343 |             | Op0662r | 0.39 | 1.49 | 0.25 | 16.58 | Q8GQ53 Putative uncharacterized protein ORF C57 |
| Rmet_2344 |             | Op0662r | 0.47 | 1.91 | 0.27 | 6.66  | Q8GQ54 Putative excisionase                     |
| Rmet_2346 |             | Op0663f | 0.46 | 1.41 | 0.49 | 2.88  | Q8GQ56 Putative uncharacterized protein ORF C54 |
| Rmet_2349 |             | Op0663f | 0.30 | 3.19 | 0.31 | 4.02  | Q8GQ59 Putative uncharacterized protein ORF C51 |
| Rmet_2350 |             | Op0663f | 0.34 | 1.12 | 0.39 | 5.92  | Q8GQ60 Putative uncharacterized protein ORF C50 |
| Rmet_2352 |             | Op0663f | 0.39 | 2.56 | 0.45 | 1.65  | Q8GQ62 Putative uncharacterized protein ORF C48 |
| Rmet_2354 |             | Op0663f | 0.31 | 1.06 | 0.41 | 1.97  | Q8GQ64 Putative uncharacterized protein ORF C46 |
| Rmet_2355 |             | Op0663f | 0.43 | 2.00 | 0.47 | 3.06  | Q8GQ65 Putative DNA repair protein RadC         |
| Rmet_2356 |             | Op0663f | 0.41 | 2.55 | 0.38 | 4.28  | Q8GQ66 Putative uncharacterized protein ORF C44 |
| Rmet_2357 |             | Op0663f | 0.30 | 1.18 | 0.50 | 2.85  | Q8GQ67 Putative uncharacterized protein ORF C43 |
| Rmet_2358 |             | Op0663f | 0.36 | 3.55 | 0.42 | 3.93  | Q8GQ68 Putative uncharacterized protein ORF C42 |
| Rmet_2359 |             | Op0663f | 0.43 | 2.06 | 0.39 | 5.88  | Q8GQ69 Putative uncharacterized protein ORF C41 |
| Rmet_2360 |             | Op0663f | 0.35 | 8.03 | 0.25 | 4.86  | Q8GQ70 Putative uncharacterized protein ORF C40 |
| Rmet_2361 |             | Op0664r | 0.30 | 1.22 | 0.26 | 6.05  | Q8GQ71 Putative uncharacterized protein ORF C39 |

|                       |         |             |      |             |       |                                                                                                                              |
|-----------------------|---------|-------------|------|-------------|-------|------------------------------------------------------------------------------------------------------------------------------|
| Rmet_2362             | Op0664r | <b>0.18</b> | 1.48 | <b>0.08</b> | 17.80 | Q8GQ72 Putative uncharacterized protein ORF C38                                                                              |
| Rmet_2363             | Op0664r | <b>0.47</b> | 1.46 | <b>0.27</b> | 5.37  | Q8GQ73 Putative uncharacterized protein ORF C37                                                                              |
| Rmet_2369             | Op0668r | <b>0.39</b> | 2.99 | <b>0.33</b> | 4.38  | Q8GQ79 Similar to metabolite transport protein                                                                               |
| Rmet_2370             | Op0669f | <b>0.45</b> | 4.94 | <b>0.42</b> | 3.99  | Q8GQ80 Putative transcriptional activator                                                                                    |
| Rmet_2371             | Op0669f | <b>0.44</b> | 1.76 | <b>0.47</b> | 3.60  | Q8GQ81 Putative uncharacterized protein ORF C29                                                                              |
| Rmet_2503             | Op0694r | <b>0.49</b> | 1.97 | <b>0.47</b> | 1.67  | Q1LKE6 Glucose-methanol-choline oxidoreductase                                                                               |
| Rmet_2525             | Op0698r | <b>0.46</b> | 1.98 | <b>0.49</b> | 3.55  | Q1LKC4 AMP-dependent synthetase and ligase                                                                                   |
| Rmet_2548             | Op0707f | <b>0.44</b> | 2.10 | <b>0.46</b> | 1.86  | Q1LKA1 Putative uncharacterized protein                                                                                      |
| Rmet_2619             | Op0733f | <b>0.36</b> | 3.54 | <b>0.48</b> | 5.41  | Q1LK30 Putative uncharacterized protein                                                                                      |
| Rmet_2621 <i>zupT</i> | Op0734r | <b>0.20</b> | 5.50 | <b>0.23</b> | 4.42  | Q1LK28 Zinc/iron permease                                                                                                    |
| Rmet_2647             | Op0748r | <b>0.27</b> | 1.65 | <b>0.20</b> | 5.04  | Q1LK02 Transcriptional regulator, AsnC family<br>Q0K7X0 Signal transduction protein containing PAS, GGDEF<br>and EAL domains |
| Rmet_2658             | Op0754r | <b>0.36</b> | 2.53 | <b>0.22</b> | 23.80 |                                                                                                                              |
| Rmet_2683             | Op0757f | <b>0.45</b> | 1.44 | <b>0.28</b> | 6.31  | Q1LJX0 Putative transmembrane protein                                                                                        |
| Rmet_2686             | Op0757f | <b>0.40</b> | 2.81 | <b>0.35</b> | 3.41  | Q1LJW7 Pilus assembly protein PilE                                                                                           |
| Rmet_2687             | Op0757f | <b>0.27</b> | 3.91 | <b>0.26</b> | 5.16  | Q1LJW6 Pilus assembly protein Fim                                                                                            |
| Rmet_2758 <i>fdhC</i> | Op0776r | <b>0.47</b> | 2.76 | <b>0.48</b> | 3.61  | Q1LJP5 Formate dehydrogenase gamma subunit<br>Q1LJM5 Adenosylcobyrinic acid synthase (Glutamine-<br>hydrolysing)             |
| Rmet_2778 <i>cobQ</i> | Op0782r | <b>0.43</b> | 3.43 | <b>0.49</b> | 6.67  |                                                                                                                              |
| Rmet_2780 <i>cobD</i> | Op0783f | <b>0.48</b> | 2.14 | <b>0.48</b> | 4.80  | Q1LJM3 Adenosylcobinamide-phosphate synthase                                                                                 |
| Rmet_2798             | Op0786r | <b>0.40</b> | 2.01 | <b>0.37</b> | 6.69  | Q1LJK5 Transcriptional regulator, GntR family                                                                                |
| Rmet_2802             | Op0788r | <b>0.23</b> | 0.68 | <b>0.48</b> | 3.85  | Q1LJK1 Prolipoprotein diacylglyceryl transferase                                                                             |
| <b>CMGI-5</b>         |         |             |      |             |       |                                                                                                                              |
| Rmet_2825             | Op0795f | <b>0.42</b> | 3.69 | <b>0.45</b> | 8.97  | Q1LJH8 Plasmid encoded RepA protein                                                                                          |
| Rmet_2826             | Op0795f | <b>0.48</b> | 1.70 | <b>0.46</b> | 7.64  | Q1LJH7 Putative uncharacterized protein<br>Q1LJH6 Putative TraY/DotA-like type IV secretion system<br>protein                |
| Rmet_2827             | Op0795f | <b>0.37</b> | 3.22 | <b>0.35</b> | 19.84 |                                                                                                                              |
| Rmet_2858             | Op0804r | <b>0.45</b> | 3.36 | <b>0.47</b> | 2.97  | Q1LJE5 ABC transport systems inner membrane<br>component                                                                     |
| Rmet_2859             | Op0804r | <b>0.49</b> | 1.21 | <b>0.49</b> | 3.76  | Q1LJE4 Substrate-binding region of ABC-type glycine<br>betaine transporter s                                                 |
| Rmet_2876             | Op0808r | <b>0.20</b> | 1.56 | <b>0.09</b> | 30.50 | Q1LJC7 MscS Mechanosensitive ion channel                                                                                     |
| Rmet_2883             | Op0811f | <b>0.49</b> | 4.31 | <b>0.45</b> | 2.37  | Q1LJC0 RNA-directed DNA polymerase                                                                                           |
| Rmet_2898             | Op0815f | <b>0.44</b> | 3.45 | <b>0.50</b> | 2.01  | Q1LJA5 Putative uncharacterized protein                                                                                      |

|                |                     |             |      |             |       |                                                        |
|----------------|---------------------|-------------|------|-------------|-------|--------------------------------------------------------|
| Rmet_2921      | Op0826r             | <b>0.49</b> | 3.29 | <b>0.50</b> | 3.59  | Q1LJ82 Chaperone protein dnaJ                          |
| Rmet_3086      | Op0869f             | <b>0.33</b> | 4.07 | <b>0.09</b> | 2.82  | Q1LIR8 Uncharacterized protein UPF0065                 |
| Rmet_3087      | <i>nrdB</i> Op0870r | <b>0.40</b> | 2.00 | <b>0.15</b> | 27.29 | Q1LIR7 Ribonucleotide reductase                        |
| Rmet_3092      | Op0870r             | <b>0.50</b> | 2.08 | <b>0.40</b> | 11.96 | Q1LIR2 Putative uncharacterized protein                |
| Rmet_3093      | Op0870r             | <b>0.48</b> | 2.88 | <b>0.35</b> | 4.61  | Q1LIR1 Cytochrome c assembly protein                   |
| Rmet_3097      | Op0872r             | <b>0.46</b> | 1.19 | <b>0.35</b> | 11.52 | Q1LIQ7 Putative uncharacterized protein                |
| Rmet_3158      | Op0884r             | <b>0.36</b> | 1.33 | <b>0.46</b> | 3.46  | Q1LIJ6 Extracellular solute-binding protein, family 5  |
| Rmet_3169      | Op0890r             | <b>0.48</b> | 2.43 | <b>0.48</b> | 8.29  | Q1LI5 Cytochrome d1, heme region                       |
| Rmet_3187      | Op0896r             | <b>0.41</b> | 1.52 | <b>0.49</b> | 3.40  | Q1LIG7 Putative uncharacterized protein                |
| Rmet_3188      | Op0896r             | <b>0.43</b> | 2.78 | <b>0.34</b> | 4.17  | Q1LIG6 Peptidase M61                                   |
| Rmet_3206      | Op0902r             | <b>0.41</b> | 1.44 | <b>0.39</b> | 3.20  | Q1LIE8 Putative uncharacterized protein                |
| Rmet_3213      | Op0906r             | <b>0.43</b> | 2.41 | <b>0.40</b> | 3.85  | Q1LIE1 Cl-channel, voltage gated                       |
| Rmet_3344      | Op0931f             | <b>0.46</b> | 2.59 | <b>0.43</b> | 5.17  | Q1LI10 Putative membrane protein                       |
| Rmet_3345      | Op0931f             | <b>0.45</b> | 3.10 | <b>0.29</b> | 5.63  | Q1LI09 Putative uncharacterized protein                |
| <b>CMGI-10</b> |                     |             |      |             |       |                                                        |
| Rmet_3358      | Op0935f             | <b>0.24</b> | 1.61 | <b>0.13</b> | 10.22 | Q1LHZ6 Putative uncharacterized protein                |
| Rmet_3359      | Op0935f             | <b>0.14</b> | 1.77 | <b>0.11</b> | 5.64  | Q1LHZ5 UBA/THIF-type NAD/FAD binding fold              |
| Rmet_3360      | Op0935f             | <b>0.36</b> | 1.98 | <b>0.17</b> | 7.63  | Q1LHZ4 Putative uncharacterized protein                |
| Rmet_3361      | Op0935f             | <b>0.26</b> | 1.91 | <b>0.19</b> | 7.91  | Q1LHZ3 Putative uncharacterized protein                |
| Rmet_3362      | Op0935f             | <b>0.27</b> | 1.43 | <b>0.19</b> | 6.47  | Q1LHZ2 Putative uncharacterized protein                |
| Rmet_3363      | Op0936r             | <b>0.48</b> | 1.69 | <b>0.48</b> | 3.96  | Q1LHZ1 Putative uncharacterized protein                |
| Rmet_3365      | Op0936r             | <b>0.14</b> | 1.46 | <b>0.12</b> | 12.82 | Q1LHY9 Integrase, catalytic region                     |
| Rmet_3366      | Op0936r             | <b>0.49</b> | 1.40 | <b>0.43</b> | 3.74  | Q1LHY8 Putative uncharacterized protein                |
| Rmet_3369      | Op0937f             | <b>0.43</b> | 2.08 | <b>0.43</b> | 7.71  | Q1LHY5 Phenylacetate-CoA oxygenase, PaaG subunit       |
| Rmet_3370      | Op0937f             | <b>0.42</b> | 2.79 | <b>0.44</b> | 6.31  | Q1LHY4 Phenylacetic acid degradation B                 |
| Rmet_3372      | Op0937f             | <b>0.32</b> | 3.40 | <b>0.34</b> | 2.72  | Q1LHY2 Phenylacetate-CoA oxygenase, PaaJ subunit       |
| Rmet_3382      | Op0940r             | <b>0.41</b> | 1.75 | <b>0.38</b> | 4.14  | Q1LHX2 Globin                                          |
| Rmet_3594      | Op1000r             | <b>0.33</b> | 2.33 | <b>0.30</b> | 3.95  | Q1LHB0 Putative lipoprotein transmembrane              |
| Rmet_3619      | Op1007r             | <b>0.38</b> | 2.49 | <b>0.18</b> | 4.63  | Q1LH85 Transcriptional regulator, MarR family          |
| Rmet_3623      | Op1009r             | <b>0.42</b> | 2.38 | <b>0.28</b> | 6.46  | Q1LH81 Transcriptional regulator, MarR family          |
| Rmet_3625      | Op1009r             | <b>0.16</b> | 1.89 | <b>0.12</b> | 20.09 | Q1LH79 Putative uncharacterized protein                |
| Rmet_3628      | Op1011r             | <b>0.48</b> | 1.30 | <b>0.27</b> | 7.98  | Q1LH76 Putative uncharacterized protein                |
| Rmet_3681      | <i>cheW</i> Op1026f | <b>0.45</b> | 2.74 | <b>0.35</b> | 5.09  | Q1LH23 CheW protein                                    |
| Rmet_3682      | <i>aer</i> Op1026f  | <b>0.42</b> | 2.20 | <b>0.43</b> | 1.64  | Q1LH22 Methyl-accepting chemotaxis sensory transducer, |

|           |              |         |             |      |             | Pas/Pac sensor                                                                                         |
|-----------|--------------|---------|-------------|------|-------------|--------------------------------------------------------------------------------------------------------|
| Rmet_3684 |              | Op1026f | <b>0.42</b> | 3.74 | <b>0.37</b> | 1.62 Q1LH20 Putative uncharacterized protein                                                           |
| Rmet_3691 | <i>cheR</i>  | Op1026f | <b>0.46</b> | 1.69 | <b>0.46</b> | 5.78 Q1LH13 MCP methyltransferase, CheR-type<br>Q1LH11 Chemotaxis response regulator protein-glutamate |
| Rmet_3693 | <i>cheB1</i> | Op1026f | <b>0.46</b> | 3.08 | <b>0.48</b> | 3.73 methylesterase 1                                                                                  |
| Rmet_3698 | <i>flhB</i>  | Op1026f | <b>0.42</b> | 2.75 | <b>0.49</b> | 3.16 Q1LH06 Flagellar biosynthetic protein FlhB                                                        |
| Rmet_3701 | <i>flhG</i>  | Op1026f | <b>0.35</b> | 4.08 | <b>0.39</b> | 4.03 Q1LH03 Flagellar biosynthesis protein FlhG                                                        |
| Rmet_3702 | <i>fliA</i>  | Op1026f | <b>0.24</b> | 0.89 | <b>0.45</b> | 3.48 Q1LH02 RNA polymerase sigma factor                                                                |
| Rmet_3735 | <i>flgC</i>  | Op1042f | <b>0.48</b> | 0.96 | <b>0.33</b> | 4.10 Q1LGW9 Flagellar basal-body rod protein FlgC                                                      |
| Rmet_3736 | <i>flgD</i>  | Op1042f | <b>0.47</b> | 3.08 | <b>0.40</b> | 3.34 Q1LGW8 Flagellar hook capping protein                                                             |
| Rmet_3737 | <i>flgE</i>  | Op1042f | <b>0.49</b> | 2.10 | <b>0.46</b> | 2.93 Q1LGW7 Putative uncharacterized protein                                                           |
| Rmet_3738 | <i>flgF</i>  | Op1042f | <b>0.44</b> | 2.01 | <b>0.35</b> | 3.15 Q1LGW6 Flagellar basal-body rod FlgF                                                              |
| Rmet_3741 | <i>flgI</i>  | Op1042f | <b>0.49</b> | 2.33 | <b>0.44</b> | 4.47 Q1LGW3 Flagellar P-ring protein                                                                   |
| Rmet_3744 | <i>flgL</i>  | Op1042f | <b>0.44</b> | 1.39 | <b>0.38</b> | 5.63 Q1LGW0 Flagellin-like protein                                                                     |
| Rmet_3820 |              | Op1062f | <b>0.42</b> | 1.86 | <b>0.39</b> | 2.31 Q1LGN6 Putative cytochrome p450 oxidoreductase                                                    |
| Rmet_3826 |              | Op1064f | <b>0.38</b> | 1.52 | <b>0.46</b> | 1.85 Q1LGN0 Putative uncharacterized protein                                                           |
| Rmet_3832 |              | Op1065r | <b>0.45</b> | 2.61 | <b>0.34</b> | 7.83 Q1LGM4 Uncharacterized protein UPF0065                                                            |
| Rmet_3979 | <i>livM4</i> | Op1115r | <b>0.24</b> | 1.16 | <b>0.47</b> | 5.92 Q1LG79 Inner-membrane translocator                                                                |
| Rmet_4009 |              | Op1125r | <b>0.38</b> | 4.28 | <b>0.50</b> | 2.32 Q1LG49 Putative uncharacterized protein                                                           |
| Rmet_4010 | <i>aroK</i>  | Op1125r | <b>0.47</b> | 2.58 | <b>0.49</b> | 9.25 Q1LG48 Shikimate kinase                                                                           |
| Rmet_4029 |              | Op1135r | <b>0.45</b> | 2.38 | <b>0.49</b> | 3.48 Q1LG29 MscS Mechanosensitive ion channel                                                          |
| Rmet_4033 |              | Op1137r | <b>0.44</b> | 1.36 | <b>0.48</b> | 4.65 Q1LG25 Transcriptional regulator, LysR family                                                     |
| Rmet_4054 |              | Op1141r | <b>0.43</b> | 3.61 | <b>0.50</b> | 4.40 Q1LG04 Cytochrome C biogenesis protein                                                            |
| Rmet_4084 | <i>phoA1</i> | Op1148f | <b>0.34</b> | 2.25 | <b>0.46</b> | 2.38 Q1LFX5 Alkaline phosphatase                                                                       |
| Rmet_4121 |              | Op1160f | <b>0.35</b> | 1.55 | <b>0.45</b> | 2.11 Q1LFT8 Secretion protein HlyD                                                                     |
| Rmet_4123 |              | Op1162f | <b>0.34</b> | 2.17 | <b>0.35</b> | 18.41 Q1LFT6 Heavy metal efflux pump CzcA                                                              |
| Rmet_4128 |              | Op1164f | <b>0.33</b> | 2.29 | <b>0.19</b> | 3.70 Q1LFT1 Putative uncharacterized protein                                                           |
| Rmet_4134 | <i>pdhA</i>  | Op1165r | <b>0.09</b> | 0.62 | <b>0.46</b> | 4.56 Q1LFS5 Dehydrogenase, E1 component                                                                |
| Rmet_4135 |              | Op1165r | <b>0.39</b> | 3.34 | <b>0.39</b> | 4.61 Q1LFS4 Putative uncharacterized protein                                                           |
| Rmet_4136 | <i>tauD</i>  | Op1166f | <b>0.47</b> | 4.50 | <b>0.42</b> | 7.90 Q1LFS3 Taurine catabolism dioxygenase TauD/TfdA                                                   |
| Rmet_4157 |              | Op1170f | <b>0.29</b> | 0.98 | <b>0.49</b> | 5.12 Q1LFQ2 Putative lipoprotein                                                                       |
| Rmet_4159 |              | Op1170f | <b>0.37</b> | 6.65 | <b>0.48</b> | 2.85 Q1LFQ0 Putative transmembrane protein                                                             |
| Rmet_4173 |              | Op1175r | <b>0.22</b> | 0.98 | <b>0.45</b> | 6.32 Q1LFN6 Putative uncharacterized protein                                                           |
| Rmet_4198 |              | Op1190f | <b>0.44</b> | 2.35 | <b>0.26</b> | 3.45 Q1LFL1 Transcriptional regulator, PadR family                                                     |

|           |              |         |      |       |      |       |                                                                                                       |
|-----------|--------------|---------|------|-------|------|-------|-------------------------------------------------------------------------------------------------------|
| Rmet_4203 |              | Op1192f | 0.45 | 1.49  | 0.47 | 3.80  | Q1LFK6 Uncharacterized protein UPF0065                                                                |
| Rmet_4204 |              | Op1192f | 0.44 | 3.27  | 0.39 | 15.12 | Q1LFK5 LmbE-like protein                                                                              |
| Rmet_4218 |              | Op1197r | 0.36 | 3.01  | 0.33 | 26.42 | Q1LFJ1 Lysine exporter protein (LYSE/YGGA)                                                            |
| Rmet_4279 |              | Op1215r | 0.47 | 1.97  | 0.49 | 1.67  | Q1LFD1 Fusaric acid resistance protein conserved region                                               |
| Rmet_4283 |              | Op1217r | 0.31 | 0.77  | 0.50 | 5.24  | Q1LFC7 Putative uncharacterized protein                                                               |
| Rmet_4350 |              | Op1239r | 0.39 | 1.63  | 0.47 | 2.91  | Q1LF61 UvrD/REP helicase family protein                                                               |
| Rmet_4351 |              | Op1240f | 0.46 | 8.25  | 0.35 | 4.00  | Q1LF60 Putative uncharacterized protein<br>Q1LF50 L-carnitine dehydratase/bile acid-inducible protein |
| Rmet_4361 |              | Op1244f | 0.43 | 2.69  | 0.48 | 3.89  | F                                                                                                     |
| Rmet_4369 |              | Op1246f | 0.33 | 2.23  | 0.34 | 3.98  | Q1LF42 Major facilitator superfamily MFS_1                                                            |
| Rmet_4414 |              | Op1257r | 0.42 | 1.08  | 0.50 | 11.45 | Q1LEZ7 Short-chain dehydrogenase/reductase SDR                                                        |
| Rmet_4440 |              | Op1263r | 0.34 | 3.77  | 0.41 | 9.67  | Q1LEX1 Endoribonuclease L-PSP                                                                         |
| Rmet_4461 |              | Op1271r | 0.16 | 0.62  | 0.47 | 3.87  | Q1LEV0 Putative uncharacterized protein<br>Q1LEU6 Two component heavy metal response                  |
| Rmet_4465 | <i>czcR2</i> | Op1274f | 0.38 | 2.78  | 0.33 | 5.89  | transcriptional regulator                                                                             |
| Rmet_4472 |              | Op1275r | 0.32 | 1.54  | 0.24 | 7.49  | Q1LEG4 Sulphate transporter                                                                           |
| Rmet_4489 |              | Op1279r | 0.37 | 3.44  | 0.40 | 5.63  | Q1LES2 Zonular occludens toxin                                                                        |
| Rmet_4490 |              | Op1279r | 0.31 | 1.99  | 0.22 | 6.48  | Q1LES1 Putative uncharacterized protein                                                               |
| Rmet_4492 |              | Op1279r | 0.46 | 2.18  | 0.38 | 5.45  | Q1LER9 Putative uncharacterized protein                                                               |
| Rmet_4493 |              | Op1279r | 0.38 | 1.83  | 0.17 | 4.37  | Q1LER8 Putative uncharacterized protein                                                               |
| Rmet_4494 |              | Op1279r | 0.26 | 1.37  | 0.15 | 6.40  | Q1LER7 Putative uncharacterized protein<br>Q1LEN9 Transcriptional regulator, AraC family with         |
| Rmet_4522 |              | Op1295r | 0.48 | 1.65  | 0.39 | 3.09  | amidase-like domain                                                                                   |
| Rmet_4587 |              | Op1320f | 0.30 | 3.56  | 0.31 | 4.88  | Q1LEH7 Glycosyl transferase, family 39<br>Q1LEH6 Putative small multidrug resistance                  |
| Rmet_4588 |              | Op1320f | 0.37 | 4.50  | 0.39 | 6.14  | transmembrane protein                                                                                 |
| Rmet_4590 | <i>arnC</i>  | Op1320f | 0.28 | 3.32  | 0.40 | 3.38  | Q1LEH4 Glycosyl transferase, family 2                                                                 |
| Rmet_4591 |              | Op1320f | 0.35 | 12.67 | 0.46 | 3.12  | Q1LEH3 Formyl transferase-like protein                                                                |
| Rmet_4593 |              | Op1320f | 0.47 | 10.58 | 0.46 | 3.06  | Q1LEH1 Polysaccharide deacetylase                                                                     |
| Rmet_4600 |              | Op1324f | 0.27 | 2.31  | 0.18 | 19.44 | Q1LEG4 Sulphate transporter                                                                           |
| Rmet_4601 |              | Op1324f | 0.45 | 3.30  | 0.45 | 2.62  | Q1LEG3 UspA                                                                                           |
| Rmet_4603 |              | Op1324f | 0.19 | 3.25  | 0.21 | 6.70  | Q1LEG1 Transcriptional regulator, GntR family                                                         |
| Rmet_4604 |              | Op1324f | 0.17 | 2.56  | 0.13 | 9.07  | Q1LEG0 Putative uncharacterized protein                                                               |
| Rmet_4606 | <i>metY</i>  | Op1326f | 0.38 | 2.16  | 0.37 | 1.96  | Q1LEF8 O-acetylhomoserine/O-acetylserine sulfhydrylase                                                |

|           |                     |             |      |             |       |                                                                                                           |
|-----------|---------------------|-------------|------|-------------|-------|-----------------------------------------------------------------------------------------------------------|
| Rmet_4609 | Op1328f             | <b>0.36</b> | 2.65 | <b>0.39</b> | 7.82  | Q1LEF5 Uncharacterized protein UPF0065                                                                    |
| Rmet_4611 | Op1328f             | <b>0.35</b> | 3.23 | <b>0.39</b> | 4.49  | Q1LEF3 Putative uncharacterized protein                                                                   |
| Rmet_4613 | Op1329r             | <b>0.38</b> | 1.67 | <b>0.33</b> | 10.54 | Q1LEF1 Acyl-CoA dehydrogenase-like protein                                                                |
| Rmet_4615 | Op1330f             | <b>0.36</b> | 3.40 | <b>0.33</b> | 9.84  | Q1LEE9 Transcriptional regulator, GntR family                                                             |
| Rmet_4616 | Op1330f             | <b>0.29</b> | 3.32 | <b>0.32</b> | 6.09  | Q1LEE8 Putative uncharacterized protein                                                                   |
| Rmet_4617 | Op1330f             | <b>0.31</b> | 1.92 | <b>0.23</b> | 5.10  | Q1LEE7 TonB-dependent siderophore receptor                                                                |
| Rmet_4618 | Op1331r             | <b>0.31</b> | 2.56 | <b>0.22</b> | 4.65  | Q1LEE6 Putative uncharacterized protein<br>Q1LEE5 RND efflux system, outer membrane lipoprotein,          |
| Rmet_4619 | Op1331r             | <b>0.33</b> | 1.98 | <b>0.26</b> | 5.07  | NodT                                                                                                      |
| Rmet_4623 | Op1332f             | <b>0.42</b> | 2.50 | <b>0.49</b> | 1.66  | Q1LEE1 Putative uncharacterized protein                                                                   |
| Rmet_4629 | Op1334f             | <b>0.44</b> | 3.41 | <b>0.49</b> | 1.43  | Q1LED5 Transcriptional regulator, AraC family                                                             |
| Rmet_4633 | <i>tauD</i> Op1337r | <b>0.38</b> | 2.94 | <b>0.47</b> | 4.78  | Q1LED1 Taurine catabolism dioxygenase TauD/TfdA                                                           |
| Rmet_4635 | Op1339r             | <b>0.29</b> | 1.72 | <b>0.47</b> | 3.10  | Q1LEC9 Sulphate transporter                                                                               |
| Rmet_4640 | Op1341r             | <b>0.37</b> | 4.35 | <b>0.47</b> | 4.05  | Q1LEC4 Putative uncharacterized protein<br>Q1LEC3 ATP-dependent endonuclease of the OLD family-           |
| Rmet_4641 | Op1341r             | <b>0.45</b> | 4.33 | <b>0.49</b> | 16.93 | like protein                                                                                              |
| Rmet_4642 | Op1341r             | <b>0.43</b> | 2.24 | <b>0.49</b> | 1.83  | Q1LEC2 Putative uncharacterized protein                                                                   |
| Rmet_4643 | Op1341r             | <b>0.37</b> | 2.20 | <b>0.32</b> | 12.30 | Q1LEC1 Putative uncharacterized protein                                                                   |
| Rmet_4644 | Op1341r             | <b>0.36</b> | 1.73 | <b>0.22</b> | 9.14  | Q1LEC0 Carboxymuconolactone decarboxylase                                                                 |
| Rmet_4645 | Op1341r             | <b>0.17</b> | 2.96 | <b>0.08</b> | 3.60  | Q1LEB9 Uncharacterized protein UPF0065                                                                    |
| Rmet_4646 | Op1341r             | <b>0.40</b> | 4.50 | <b>0.43</b> | 4.53  | Q1LEB8 Short-chain dehydrogenase/reductase SDR                                                            |
| Rmet_4647 | Op1342f             | <b>0.44</b> | 4.12 | <b>0.36</b> | 6.95  | Q1LEB7 Transcriptional regulator, LacI family                                                             |
| Rmet_4648 | Op1343r             | <b>0.40</b> | 3.80 | <b>0.35</b> | 5.55  | Q1LEB6 Filamentation induced by cAMP protein Fic<br>Q1LEB5 RND efflux system, outer membrane lipoprotein, |
| Rmet_4649 | Op1343r             | <b>0.34</b> | 5.15 | <b>0.33</b> | 3.79  | NodT                                                                                                      |
| Rmet_4650 | Op1344f             | <b>0.46</b> | 3.50 | <b>0.48</b> | 5.22  | Q1LEB4 Putative transcriptional regulator                                                                 |
| Rmet_4662 | Op1349r             | <b>0.42</b> | 2.24 | <b>0.47</b> | 2.69  | Q1LEA2 Putative uncharacterized protein                                                                   |
| Rmet_4668 | Op1351r             | <b>0.39</b> | 2.88 | <b>0.39</b> | 5.81  | Q1LE96 NADH/Ubiquinone/plastoquinone (Complex I)                                                          |
| Rmet_4685 | Op1355r             | <b>0.39</b> | 2.63 | <b>0.50</b> | 3.38  | Q1LE79 Putative uncharacterized protein                                                                   |
| Rmet_4700 | Op1359r             | <b>0.39</b> | 3.89 | <b>0.47</b> | 3.51  | Q1LE64 Conserved hypothetical signal peptide protein                                                      |
| Rmet_4730 | Op1367r             | <b>0.35</b> | 6.39 | <b>0.39</b> | 6.57  | Q1LE34 Uncharacterised peroxidase-related                                                                 |
| Rmet_4735 | Op1369r             | <b>0.36</b> | 3.86 | <b>0.48</b> | 3.75  | Q1LE29 D-galactonate transporter                                                                          |
| Rmet_4754 | Op1381r             | <b>0.47</b> | 3.05 | <b>0.42</b> | 11.28 | Q1LE10 Glycosyl transferase, family 2                                                                     |
| Rmet_4805 | <i>kbl</i> Op1397r  | <b>0.42</b> | 2.86 | <b>0.39</b> | 2.10  | Q1LDV9 2-amino-3-ketobutyrate coenzyme A ligase                                                           |

|           |             |         |      |       |      |       |                                                                                                           |
|-----------|-------------|---------|------|-------|------|-------|-----------------------------------------------------------------------------------------------------------|
| Rmet_4808 |             | Op1399r | 0.47 | 3.56  | 0.33 | 5.24  | Q1LDV6 Di-haem cytochrome c peroxidase                                                                    |
| Rmet_4836 |             | Op1411r | 0.37 | 1.62  | 0.41 | 0.83  | Q1LDS8 Diguanylate phosphodiesterase (EAL domain)                                                         |
| Rmet_4875 | <i>catD</i> | Op1425r | 0.49 | 12.74 | 0.46 | 4.48  | Q1LDN9 3-oxoadipate enol-lactonase                                                                        |
| Rmet_4876 |             | Op1425r | 0.41 | 4.15  | 0.33 | 2.34  | Q1LDN8 Uncharacterized protein UPF0065                                                                    |
| Rmet_4881 | <i>catA</i> | Op1428f | 0.50 | 1.73  | 0.45 | 4.43  | Q1LDN3 Catechol 1,2-dioxygenase<br>Q1LDM3 Sulfite dehydrogenase (Cytochrome) subunit SorA                 |
| Rmet_4891 |             | Op1430f | 0.44 | 1.68  | 0.47 | 6.77  | apoprotein                                                                                                |
| Rmet_4960 |             | Op1457r | 0.33 | 1.18  | 0.50 | 4.41  | Q1LDF4 Pili assembly chaperone                                                                            |
| Rmet_4962 |             | Op1457r | 0.38 | 1.57  | 0.42 | 3.37  | Q1LDF2 Diguanylate phosphodiesterase (EAL domain)<br>Q1LDF0 Two component transcriptional regulator, LuxR |
| Rmet_4964 |             | Op1457r | 0.42 | 1.36  | 0.47 | 3.34  | family                                                                                                    |
| Rmet_4977 |             | Op1461r | 0.45 | 1.81  | 0.42 | 4.54  | Q1LDD7 Sensor protein<br>Q1LDD6 Two component transcriptional regulator, winged                           |
| Rmet_4978 |             | Op1461r | 0.27 | 1.17  | 0.12 | 39.35 | helix family                                                                                              |
| Rmet_4979 |             | Op1461r | 0.38 | 2.57  | 0.24 | 4.86  | Q1LDD5 Putative uncharacterized protein                                                                   |
| Rmet_4981 |             | Op1461r | 0.43 | 2.07  | 0.36 | 4.96  | Q1LDD3 Putative uncharacterized protein                                                                   |
| Rmet_4982 |             | Op1461r | 0.35 | 4.46  | 0.34 | 10.49 | Q1LDD2 Undecaprenyl-diphosphatase                                                                         |
| Rmet_5007 |             | Op1470f | 0.36 | 2.49  | 0.36 | 4.44  | Q1LDA7 Putative uncharacterized protein                                                                   |
| Rmet_5008 |             | Op1470f | 0.42 | 2.31  | 0.42 | 2.47  | Q1LDA6 CsbD-like protein<br>Q1LDA3 Pyridine nucleotide-disulphide oxidoreductase                          |
| Rmet_5011 |             | Op1473r | 0.43 | 2.88  | 0.44 | 6.62  | dimerisation region                                                                                       |
| Rmet_5033 | <i>cusA</i> | Op1480f | 0.38 | 3.68  | 0.32 | 6.53  | Q1LD81 Heavy metal efflux pump CzcA                                                                       |
| Rmet_5040 |             | Op1482f | 0.48 | 2.36  | 0.47 | 1.65  | Q1LD74 Transcriptional regulator, GntR family                                                             |
| Rmet_5079 |             | Op1496f | 0.41 | 2.41  | 0.37 | 5.40  | Q1LD38 Putative uncharacterized protein                                                                   |
| Rmet_5082 |             | Op1496f | 0.44 | 2.57  | 0.47 | 11.07 | Q1LD35 OmpA/MotB                                                                                          |
| Rmet_5111 |             | Op1505r | 0.38 | 2.51  | 0.46 | 1.66  | Q1LD06 Thiolase                                                                                           |
| Rmet_5112 |             | Op1505r | 0.21 | 2.44  | 0.17 | 8.94  | Q1LD05 Putative uncharacterized protein                                                                   |
| Rmet_5128 | <i>aldB</i> | Op1513r | 0.46 | 5.39  | 0.46 | 7.48  | Q1LCY9 Aldehyde dehydrogenase                                                                             |
| Rmet_5133 |             | Op1513r | 0.42 | 1.81  | 0.29 | 4.25  | Q1LCY4 Acyl-CoA dehydrogenase-like protein                                                                |
| Rmet_5172 |             | Op1522f | 0.36 | 2.49  | 0.43 | 2.88  | Q1LCU5 Putative uncharacterized protein                                                                   |
| Rmet_5175 |             | Op1522f | 0.37 | 1.81  | 0.44 | 4.14  | Q1LCU2 Putative uncharacterized protein                                                                   |
| Rmet_5176 |             | Op1522f | 0.33 | 1.05  | 0.44 | 2.42  | Q1LCU1 Translation initiation factor IF-1 3                                                               |
| Rmet_5177 |             | Op1523r | 0.33 | 0.98  | 0.36 | 3.76  | Q1LCU0 Putative uncharacterized protein                                                                   |
| Rmet_5178 |             | Op1524f | 0.49 | 1.97  | 0.43 | 3.86  | Q1LCT9 Putative uncharacterized protein                                                                   |

|           |                      |      |      |      |      |                                                               |
|-----------|----------------------|------|------|------|------|---------------------------------------------------------------|
| Rmet_5179 | Op1525r              | 0.48 | 3.22 | 0.48 | 8.34 | Q1LCT8 Putative uncharacterized protein                       |
| Rmet_5185 | Op1528f              | 0.40 | 3.36 | 0.47 | 2.07 | Q1LCT2 Carbonic anhydrase                                     |
| Rmet_5195 | Op1532f              | 0.45 | 2.56 | 0.50 | 1.82 | Q1LCS2 Porin, Gram-negative type                              |
| Rmet_5225 | Op1541r              | 0.36 | 2.60 | 0.40 | 7.06 | Q1LCP2 Putative uncharacterized protein                       |
| Rmet_5230 | <i>iscS2</i> Op1543r | 0.47 | 2.88 | 0.47 | 3.39 | Q1LCN7 Aminotransferase, class V                              |
| Rmet_5236 | Op1544f              | 0.50 | 1.79 | 0.37 | 3.06 | Q1LCN1 DegT/DnrJ/EryC1/StrS aminotransferase                  |
| Rmet_5237 | Op1544f              | 0.44 | 2.66 | 0.46 | 2.19 | Q1LCN0 WbnG                                                   |
| Rmet_5238 | Op1544f              | 0.45 | 2.83 | 0.39 | 3.41 | Q1LCM9 Putative uncharacterized protein                       |
| Rmet_5239 | Op1544f              | 0.48 | 1.48 | 0.40 | 3.46 | Q1LCM8 Phytanoyl-CoA dioxygenase                              |
| Rmet_5252 | <i>fliC2</i> Op1550f | 0.49 | 3.76 | 0.27 | 3.48 | Q1LCL5 Flagellin-like protein                                 |
| Rmet_5253 | Op1550f              | 0.33 | 4.61 | 0.36 | 2.13 | Q1LCL4 Flagellar protein FlaG protein                         |
| Rmet_5255 | <i>fliS</i> Op1550f  | 0.46 | 6.70 | 0.40 | 4.03 | Q1LCL2 Flagellar protein FliS                                 |
| Rmet_5256 | Op1550f              | 0.46 | 3.51 | 0.46 | 6.43 | Q1LCL1 Flagellar protein FliT                                 |
| Rmet_5263 | <i>fliH</i> Op1552f  | 0.43 | 1.47 | 0.46 | 3.31 | Q1LCK4 Flagellar assembly protein FliH                        |
| Rmet_5265 | <i>fliJ</i> Op1552f  | 0.49 | 1.60 | 0.47 | 3.14 | Q1LCK2 Flagellar export FliJ                                  |
| Rmet_5266 | <i>fliK</i> Op1552f  | 0.32 | 0.68 | 0.50 | 1.87 | Q1LCK1 Flagellar hook-length control protein                  |
| Rmet_5300 | <i>fliO</i> Op1566f  | 0.44 | 1.05 | 0.47 | 2.50 | Q1LCG7 Flagellar biosynthesis protein, FliO                   |
| Rmet_5332 | Op1578f              | 0.39 | 3.65 | 0.50 | 3.11 | Q1LCD5 Sensor protein                                         |
| Rmet_5333 | Op1579r              | 0.25 | 1.17 | 0.24 | 1.31 | Q1LCD4 Putative uncharacterized protein                       |
| Rmet_5352 | Op1590f              | 0.48 | 3.24 | 0.41 | 2.29 | Q1LCB5 Putative uncharacterized protein                       |
| Rmet_5353 | Op1590f              | 0.42 | 1.64 | 0.50 | 5.66 | Q1LCB4 Pyridoxamine 5'-phosphate oxidase-related, FMN-binding |
| Rmet_5365 | Op1596f              | 0.34 | 1.51 | 0.39 | 0.83 | Q1LCA2 Transcriptional regulator, LysR family                 |
| Rmet_5376 | <i>hmuT</i> Op1600f  | 0.48 | 1.93 | 0.47 | 2.64 | Q1LC91 Periplasmic binding protein                            |
| Rmet_5378 | <i>hmuV</i> Op1600f  | 0.48 | 1.65 | 0.49 | 1.77 | Q1LC89 Hemin import ATP-binding protein hmuV                  |
| Rmet_5379 | Op1601r              | 0.44 | 4.32 | 0.47 | 2.48 | Q1LC88 Short-chain dehydrogenase/reductase SDR                |
| Rmet_5380 | Op1601r              | 0.47 | 2.63 | 0.47 | 3.00 | Q1LC87 Putative uncharacterized protein                       |
| Rmet_5386 | Op1603r              | 0.42 | 3.17 | 0.38 | 7.06 | Q1LC81 Putative uncharacterized protein                       |
| Rmet_5394 | Op1606f              | 0.38 | 1.86 | 0.40 | 5.16 | Q1LC73 Putative uncharacterized protein                       |
| Rmet_5426 | Op1614f              | 0.26 | 1.77 | 0.40 | 3.69 | Q1LC41 Putative uncharacterized protein                       |
| Rmet_5428 | Op1615r              | 0.49 | 1.51 | 0.48 | 4.90 | Q1LC39 Putative uncharacterized protein                       |
| Rmet_5437 | Op1617r              | 0.43 | 2.88 | 0.48 | 2.55 | Q1LC30 Acyl-CoA dehydrogenase-like protein                    |
| Rmet_5467 | Op1625r              | 0.45 | 2.58 | 0.35 | 4.61 | Q1LC00 Putative uncharacterized protein                       |
| Rmet_5490 | <i>pobA</i> Op1631r  | 0.50 | 1.95 | 0.42 | 6.50 | Q1LBX7 Monooxygenase, FAD-binding                             |



|           |                     |             |      |             |                                                                                                                          |
|-----------|---------------------|-------------|------|-------------|--------------------------------------------------------------------------------------------------------------------------|
| Rmet_5497 | Op1634f             | <b>0.38</b> | 3.41 | <b>0.45</b> | 5.35 Q1LBX0 Integrase, catalytic region                                                                                  |
| Rmet_5500 | Op1636f             | <b>0.44</b> | 1.69 | <b>0.48</b> | 5.01 Q1LBW7 Putative uncharacterized protein                                                                             |
| Rmet_5503 | Op1636f             | <b>0.35</b> | 3.36 | <b>0.50</b> | 5.63 Q1LBW4 Uncharacterized protein UPF0065                                                                              |
| Rmet_5515 | Op1641r             | <b>0.40</b> | 2.38 | <b>0.46</b> | 3.87 Q1LBV2 Aldehyde dehydrogenase                                                                                       |
| Rmet_5516 | <i>cyp</i> Op1641r  | <b>0.45</b> | 2.03 | <i>0.50</i> | 3.19 Q1LBV1 Cytochrome P450                                                                                              |
| Rmet_5517 | <i>vanB</i> Op1641r | <b>0.31</b> | 2.17 | <b>0.37</b> | 10.73 Q1LBV0 Ferredoxin                                                                                                  |
| Rmet_5521 | Op1641r             | <b>0.44</b> | 2.71 | <i>0.46</i> | 2.08 Q1LBU6 Enoyl-CoA hydratase/isomerase                                                                                |
| Rmet_5522 | Op1641r             | <i>0.45</i> | 2.23 | <b>0.50</b> | 11.07 Q1LBU5 Putative uncharacterized protein<br>Q1LBU2 L-carnitine dehydratase/bile acid-inducible protein              |
| Rmet_5525 | Op1642f             | <b>0.44</b> | 2.89 | <b>0.47</b> | 3.50 F                                                                                                                   |
| Rmet_5526 | Op1643r             | <b>0.38</b> | 1.73 | <b>0.29</b> | 6.70 Q1LBU1 Putative uncharacterized protein                                                                             |
| Rmet_5528 | Op1643r             | <i>0.45</i> | 1.88 | <b>0.42</b> | 4.15 Q1LBT9 AMP-dependent synthetase and ligase                                                                          |
| Rmet_5533 | Op1645r             | <b>0.24</b> | 1.86 | <b>0.21</b> | 22.47 Q1LBT4 Nitroreductase                                                                                              |
| Rmet_5539 | Op1647r             | <b>0.34</b> | 2.95 | <b>0.44</b> | 3.71 Q1LBS8 Putative uncharacterized protein                                                                             |
| Rmet_5627 | Op1679r             | <b>0.44</b> | 1.64 | <b>0.49</b> | 3.84 Q1LBJ0 Putative uncharacterized protein                                                                             |
| Rmet_5682 | Op1697r             | <b>0.43</b> | 2.42 | <b>0.39</b> | 3.44 Q1LBD5 Secretion protein HlyD                                                                                       |
| Rmet_5685 | Op1698f             | <b>0.38</b> | 3.58 | <b>0.35</b> | 28.05 Q1LBD2 Pilus assembly protein FimT                                                                                 |
| Rmet_5688 | Op1698f             | <b>0.44</b> | 2.87 | <b>0.49</b> | 4.81 Q1LBC9 Putative transmembrane protein                                                                               |
| Rmet_5728 | Op1715r             | <b>0.37</b> | 2.56 | <b>0.42</b> | 6.37 Q1LB89 Glycosyl transferase, group 1                                                                                |
| Rmet_5762 | Op1728f             | <b>0.50</b> | 3.69 | <b>0.44</b> | 4.24 Q1LB55 Putative uncharacterized protein                                                                             |
| Rmet_5764 | Op1729r             | <i>0.44</i> | 1.82 | <b>0.47</b> | 4.49 Q1LB53 Putative uncharacterized protein                                                                             |
| Rmet_5818 | Op1757r             | <i>0.44</i> | 1.58 | <b>0.39</b> | 2.77 Q46Q97 Cold-shock DNA-binding protein family                                                                        |
| Rmet_5821 | Op1759r             | <b>0.36</b> | 7.99 | <b>0.32</b> | 10.91 Q1LAZ6 Putative integrase/recombinase protein<br>Q1LAY5 Response regulator receiver domain protein (CheY-<br>like) |
| Rmet_5832 | Op1764f             | <b>0.34</b> | 2.16 | <b>0.43</b> | 3.17                                                                                                                     |
| Rmet_5835 | Op1764f             | <i>0.43</i> | 1.82 | <b>0.49</b> | 4.98 Q1LAY2 Sugar transferase                                                                                            |
| Rmet_5850 | Op1769r             | <b>0.43</b> | 1.72 | <i>0.48</i> | 3.87 Q1LAW7 Protein tyrosine phosphatase                                                                                 |
| Rmet_5899 | Op1787r             | <b>0.37</b> | 1.89 | <b>0.44</b> | 2.78 Q1LAR8 Putative uncharacterized protein                                                                             |
| Rmet_5918 | Op1797r             | <b>0.45</b> | 6.37 | <b>0.46</b> | 3.25 Q1LAP9 Transcriptional regulator, IclR family                                                                       |
| Rmet_5937 | Op1805r             | <b>0.47</b> | 2.58 | <b>0.46</b> | 4.09 Q1LAN0 Putative uncharacterized protein                                                                             |
| Rmet_5970 | Op1817r             | <b>0.24</b> | 2.11 | <i>0.49</i> | 1.02 Q1LAJ7 Heavy metal translocating P-type ATPase<br>P37248 Transposase for insertion sequence element                 |
| Rmet_6282 | Op1915r             | <i>0.45</i> | 2.74 | <i>0.47</i> | 2.59 IS1086                                                                                                              |

**Q(EDTA)≤0.5, Q(Zn) unchanged.**

|           |             |         |      |      |             |       |                                                                                                                                                                                      |
|-----------|-------------|---------|------|------|-------------|-------|--------------------------------------------------------------------------------------------------------------------------------------------------------------------------------------|
| Rmet_0090 |             | Op0025f | 0.86 | 0.21 | <b>0.48</b> | 2.69  | Q1LSA0 Two component transcriptional regulator, LuxR family                                                                                                                          |
| Rmet_0091 |             | Op0025f | 0.65 | 0.75 | <b>0.42</b> | 3.39  | Q1LS99 Response regulator receiver domain protein (CheY-like)                                                                                                                        |
| Rmet_0096 | <i>argS</i> | Op0029f | 0.64 | 2.58 | <b>0.43</b> | 4.56  | Q1LS94 Arginyl-tRNA synthetase                                                                                                                                                       |
| Rmet_0133 |             | Op0034r | 0.84 | 0.73 | <b>0.41</b> | 1.49  | Q1LS57 Nuclear export factor GLE1                                                                                                                                                    |
| Rmet_0137 |             | Op0037f | 0.70 | 0.85 | <b>0.30</b> | 1.13  | Q1LS53 Putative uncharacterized protein                                                                                                                                              |
| Rmet_0138 |             | Op0038r | 0.80 | 0.70 | <b>0.29</b> | 1.22  | Q1LS52 Transcriptional regulator, LysR family                                                                                                                                        |
| Rmet_0139 |             | Op0038r | 0.64 | 3.42 | <b>0.39</b> | 1.86  | Q1LS51 Putative uncharacterized protein                                                                                                                                              |
| Rmet_0158 |             | Op0046r | 0.51 | 2.58 | <b>0.34</b> | 4.94  | Q1LS32 Aldehyde dehydrogenase                                                                                                                                                        |
| Rmet_0170 | <i>ahcY</i> | Op0051f | 0.63 | 3.47 | <b>0.49</b> | 3.11  | Q1LS20 Adenosylhomocysteinase                                                                                                                                                        |
| Rmet_0175 |             | Op0052r | 0.59 | 1.36 | <b>0.48</b> | 2.53  | Q1LS15 5-formyltetrahydrofolate cyclo-ligase                                                                                                                                         |
| Rmet_0191 |             | Op0057f | 0.57 | 2.02 | <b>0.47</b> | 2.15  | Q1LRZ9 Putative type-4 fimbrial biogenesis transmembrane protein                                                                                                                     |
| Rmet_0192 |             | Op0057f | 0.51 | 1.56 | <b>0.41</b> | 4.20  | Q1LRZ8 Putative type-4 fimbrial biogenesis pily1-related protein                                                                                                                     |
| Rmet_0193 |             | Op0057f | 0.63 | 1.51 | <b>0.45</b> | 4.85  | Q1LRZ7 Pilus assembly protein PilE                                                                                                                                                   |
| Rmet_0208 |             | Op0062r | 0.56 | 2.47 | <b>0.48</b> | 3.21  | Q1LRY2 Transcriptional regulator, GntR family                                                                                                                                        |
| Rmet_0227 |             | Op0066r | 0.90 | 0.35 | <b>0.49</b> | 5.98  | Q1LRW3 Ferredoxin-like protein                                                                                                                                                       |
| Rmet_0271 |             | Op0077f | 0.74 | 0.40 | <b>0.37</b> | 1.26  | Q1LRR9 Electron transport protein SCO1/SenC                                                                                                                                          |
| Rmet_0289 | <i>prs</i>  | Op0084r | 0.81 | 1.66 | <b>0.40</b> | 15.86 | Q1LRQ1 Ribose-phosphate pyrophosphokinase                                                                                                                                            |
| Rmet_0310 |             | Op0088r | 0.52 | 5.32 | <b>0.46</b> | 1.78  | Q1LRN0 Peptidase C56, PfpI                                                                                                                                                           |
| Rmet_0355 | <i>otsB</i> | Op0101f | 0.94 | 0.25 | <b>0.39</b> | 4.04  | Q1LRI5 HAD-superfamily hydrolase subfamily IIB                                                                                                                                       |
| Rmet_0356 |             | Op0101f | 0.59 | 1.96 | <b>0.42</b> | 2.88  | Q1LRI4 Glycoside hydrolase 15-related                                                                                                                                                |
| Rmet_0359 |             | Op0102r | 0.67 | 7.20 | <b>0.39</b> | 5.59  | Q1LRI1 Predicted sulfurylase large subunit, molybdopterin cytosine dinucleotide biosynthesis / predicted sulfurylase small subunit, molybdopterin cytosine dinucleotide biosynthesis |
| Rmet_0360 |             | Op0102r | 0.52 | 0.84 | <b>0.17</b> | 7.23  | Q1LRI0 Carbon monoxide dehydrogenase subunit G                                                                                                                                       |
| Rmet_0363 | <i>coxM</i> | Op0102r | 0.54 | 2.36 | <b>0.44</b> | 8.01  | Q1LRH7 Molybdopterin dehydrogenase, FAD-binding                                                                                                                                      |
| Rmet_0365 | <i>coxS</i> | Op0102r | 0.54 | 3.81 | <b>0.44</b> | 3.38  | Q1LRH5 (2Fe-2S)-binding                                                                                                                                                              |
| Rmet_0367 |             | Op0103f | 0.53 | 2.71 | <b>0.45</b> | 5.67  | Q1LRH3 FAD linked oxidase-like protein                                                                                                                                               |
| Rmet_0368 |             | Op0103f | 0.80 | 0.58 | <b>0.42</b> | 2.99  | Q1LRH2 Histidine triad (HIT) protein                                                                                                                                                 |
| Rmet_0369 |             | Op0103f | 0.62 | 1.38 | <b>0.43</b> | 3.69  | Q1LRH1 ABC transporter-like protein                                                                                                                                                  |

|           |              |         |      |      |              |       |                                                                         |
|-----------|--------------|---------|------|------|--------------|-------|-------------------------------------------------------------------------|
| Rmet_0411 | <i>rpsI</i>  | Op0113f | 0.67 | 3.01 | <b>0.47</b>  | 3.15  | Q1LRC8 Putative uncharacterized protein                                 |
| Rmet_0452 |              | Op0118r | 0.56 | 1.90 | <b>0.43</b>  | 9.44  | Q1LR88 PhoH-like protein                                                |
| Rmet_0456 | <i>rhIE1</i> | Op0119f | 0.58 | 2.17 | <b>0.42</b>  | 3.90  | Q1LR84 DEAD/DEAH box helicase-like protein                              |
| Rmet_0466 | <i>recA</i>  | Op0123f | 0.67 | 1.25 | <b>0.43</b>  | 3.18  | Q1LR74 Protein recA                                                     |
| Rmet_0673 | <i>pilL2</i> | Op0187f | 0.65 | 1.60 | <b>0.45</b>  | 3.07  | Q1LQL7 CheA signal transduction histidine kinases                       |
| Rmet_0674 |              | Op0188r | 0.68 | 1.01 | <b>0.49</b>  | 3.22  | Q1LQL6 Major facilitator superfamily MFS_1                              |
| Rmet_0696 |              | Op0196r | 0.79 | 0.29 | <b>0.43</b>  | 2.02  | Q1LQJ4 Putative uncharacterized protein                                 |
| Rmet_0697 | <i>pilA</i>  | Op0196r | 0.62 | 1.18 | <b>0.41</b>  | 7.21  | Q1LQJ3 Pilus assembly protein major pilin PilA                          |
| Rmet_0730 |              | Op0205f | 0.69 | 1.15 | <b>0.49</b>  | 3.45  | Q1LQG0 Uracil-xanthine permease                                         |
| Rmet_0742 |              | Op0210r | 0.55 | 2.51 | <b>0.50</b>  | 14.63 | Q1LQE8 Radical SAM                                                      |
| Rmet_0748 | <i>rpsP</i>  | Op0213f | 0.96 | 0.31 | <b>0.42</b>  | 8.79  | Q1LQE2 SSU ribosomal protein S16P                                       |
| Rmet_0749 | <i>rimM</i>  | Op0213f | 0.59 | 1.08 | <b>0.35</b>  | 4.64  | Q1LQE1 Ribosome maturation factor rimM                                  |
| Rmet_0750 | <i>trmD</i>  | Op0213f | 0.77 | 0.79 | <b>0.36</b>  | 5.53  | Q1LQE0 tRNA (guanine-N(1)-)-methyltransferase                           |
| Rmet_0752 |              | Op0213f | 0.53 | 3.22 | <b>0.44</b>  | 4.87  | Q1LQD8 NUDIX hydrolase                                                  |
| Rmet_0790 |              | Op0225f | 0.61 | 1.14 | <b>0.45</b>  | 3.97  | Q1LQA0 Putative uncharacterized protein                                 |
| Rmet_0799 |              | Op0227f | 0.63 | 0.89 | <b>0.23</b>  | 6.98  | Q1LQ91 ABC transport systems inner membrane component                   |
| Rmet_0800 |              | Op0227f | 0.67 | 1.47 | <b>0.31</b>  | 11.81 | Q1LQ90 Substrate-binding region of ABC-type glycine betaine transporter |
| Rmet_0801 |              | Op0227f | 0.52 | 2.65 | <b>0.33</b>  | 15.86 | Q1LQ89 ABC transport systems inner membrane component                   |
| Rmet_0806 |              | Op0229f | 0.51 | 2.56 | <b>0.43</b>  | 2.77  | Q1LQ84 Putative uncharacterized protein                                 |
| Rmet_0807 |              | Op0229f | 0.52 | 2.51 | <b>0.42</b>  | 4.74  | Q1LQ83 Class II aldolase/adducin-like protein                           |
| Rmet_0808 |              | Op0229f | 0.56 | 1.61 | <b>0.47</b>  | 3.42  | Q1LQ82 4-oxalocrotonate tautomerase family enzyme                       |
| Rmet_0814 |              | Op0230r | 0.52 | 3.33 | <b>0.48</b>  | 3.73  | Q1LQ76 Putative uncharacterized protein                                 |
| Rmet_0818 | <i>glnS</i>  | Op0230r | 0.60 | 1.58 | <b>0.49</b>  | 4.54  | Q1LQ72 Glutaminyl-tRNA synthetase                                       |
| Rmet_0822 | <i>ggt</i>   | Op0232r | 0.54 | 1.79 | <b>-0.37</b> | 0.60  | Q1LQ68 Gamma-glutamyltransferase 2. Threonine peptidase.                |
| Rmet_0825 |              | Op0234r | 0.67 | 6.36 | <b>0.49</b>  | 18.72 | Q1LQ65 Putative uncharacterized protein                                 |
| Rmet_0828 |              | Op0236r | 0.55 | 2.02 | <b>0.50</b>  | 3.92  | Q1LQ62 Uncharacterized protein UPF0065                                  |
| Rmet_0829 |              | Op0236r | 0.52 | 2.00 | <b>0.42</b>  | 9.06  | Q1LQ61 Putative transmembrane protein                                   |
| Rmet_0830 |              | Op0236r | 0.67 | 2.55 | <b>0.44</b>  | 1.54  | Q1LQ60 L-carnitine dehydratase/bile acid-inducible protein              |
| Rmet_0833 |              | Op0238r | 0.59 | 1.70 | <b>0.46</b>  | 4.69  | F                                                                       |
|           |              |         |      |      |              |       | Q1LQ57 Transcriptional regulator, GntR family                           |

|           |             |         |      |      |             |       |                                                                  |
|-----------|-------------|---------|------|------|-------------|-------|------------------------------------------------------------------|
| Rmet_0834 | <i>gudD</i> | Op0239f | 0.52 | 2.53 | <b>0.49</b> | 1.72  | Q1LQ56 D-glucarate dehydratase                                   |
| Rmet_0860 |             | Op0247f | 0.55 | 5.41 | <b>0.43</b> | 5.79  | Q1LQ30 Putative uncharacterized protein                          |
| Rmet_0862 |             | Op0248r | 0.69 | 0.31 | <b>0.40</b> | 4.29  | Q1LQ28 Putative uncharacterized protein                          |
| Rmet_0894 |             | Op0259f | 0.71 | 3.19 | <b>0.46</b> | 3.68  | Q1LPZ6 Transcriptional regulator, LysR family                    |
| Rmet_0918 | <i>leuA</i> | Op0263f | 0.63 | 3.51 | <b>0.45</b> | 3.70  | Q1LPX2 2-isopropylmalate synthase                                |
| Rmet_0921 | <i>rpsO</i> | Op0265f | 0.53 | 1.67 | <b>0.45</b> | 4.65  | Q1LPW9 30S ribosomal protein S15                                 |
| Rmet_0922 |             | Op0266r | 0.71 | 1.56 | <b>0.42</b> | 4.05  | Q1LPW8 Putative uncharacterized protein                          |
| Rmet_0925 | <i>tpiA</i> | Op0267f | 0.85 | 0.56 | <b>0.46</b> | 7.77  | Q1LPW5 Triosephosphate isomerase                                 |
| Rmet_0926 | <i>secG</i> | Op0267f | 0.87 | 0.43 | <b>0.44</b> | 5.68  | Q1LPW4 Protein translocase subunit secG                          |
| Rmet_0928 | <i>nuoB</i> | Op0267f | 0.74 | 1.89 | <b>0.35</b> | 3.39  | Q1LPW2 NADH-quinone oxidoreductase subunit B                     |
| Rmet_0929 | <i>nuoC</i> | Op0267f | 0.71 | 2.05 | <b>0.37</b> | 4.12  | Q1LPW1 NADH-quinone oxidoreductase subunit C                     |
| Rmet_0931 | <i>nuoE</i> | Op0267f | 0.54 | 2.22 | <b>0.38</b> | 8.82  | Q1LPV9 NADH-quinone oxidoreductase, E subunit                    |
| Rmet_0932 | <i>nuoF</i> | Op0267f | 0.64 | 0.80 | <b>0.50</b> | 1.69  | Q1LPV8 NADH-quinone oxidoreductase, F subunit                    |
| Rmet_0935 | <i>nuoI</i> | Op0267f | 0.59 | 2.97 | <b>0.48</b> | 3.81  | Q1LPV5 NADH-quinone oxidoreductase subunit I                     |
| Rmet_0936 | <i>nuoJ</i> | Op0267f | 0.66 | 0.79 | <b>0.49</b> | 5.27  | Q1LPV4 NADH-ubiquinone/plastoquinone oxidoreductase, chain 6     |
| Rmet_0938 | <i>nuoL</i> | Op0267f | 0.67 | 1.24 | <b>0.47</b> | 2.93  | Q1LPV2 Proton-translocating NADH-quinone oxidoreductase, chain L |
| Rmet_0939 | <i>nuoM</i> | Op0267f | 0.57 | 1.40 | <b>0.47</b> | 5.87  | Q1LPV1 Proton-translocating NADH-quinone oxidoreductase, chain M |
| Rmet_1024 |             | Op0295f | 0.60 | 0.94 | <b>0.40</b> | 4.95  | Q1LPL6 Transcriptional regulator, BadM/Rrf2 family               |
| Rmet_1025 | <i>iscS</i> | Op0295f | 0.57 | 1.54 | <b>0.45</b> | 3.50  | Q1LPL5 Cysteine desulfurase IscS                                 |
| Rmet_1027 |             | Op0295f | 0.64 | 1.04 | <b>0.47</b> | 3.28  | Q1LPL3 Iron-sulfur cluster assembly protein IscA                 |
| Rmet_1028 | <i>hscB</i> | Op0295f | 0.69 | 0.76 | <b>0.47</b> | 6.70  | Q1LPL2 Co-chaperone Hsc20                                        |
| Rmet_1029 | <i>hscA</i> | Op0295f | 0.71 | 1.69 | <b>0.45</b> | 3.28  | Q1LPL1 Chaperone protein hscA homolog                            |
| Rmet_1030 |             | Op0295f | 0.66 | 0.95 | <b>0.43</b> | 10.86 | Q1LPL0 Ferredoxin, 2Fe-2S type                                   |
| Rmet_1031 |             | Op0295f | 0.86 | 0.15 | <b>0.49</b> | 5.18  | Q1LPK9 Putative uncharacterized protein                          |
| Rmet_1053 | <i>kdsA</i> | Op0301f | 0.60 | 4.87 | <b>0.49</b> | 3.80  | Q1LPI7 2-dehydro-3-deoxyphosphooctonate aldolase                 |
| Rmet_1054 |             | Op0301f | 0.77 | 1.46 | <b>0.49</b> | 4.32  | Q1LPI6 Putative uncharacterized protein                          |
| Rmet_1140 |             | Op0326r | 0.62 | 2.33 | <b>0.49</b> | 3.32  | Q1LPA0 FAD dependent oxidoreductase                              |
| Rmet_1160 | <i>thrS</i> | Op0333f | 0.53 | 1.98 | <b>0.30</b> | 1.99  | Q1LP80 Threonyl-tRNA synthetase / Ser-tRNA(Thr) hydrolase        |
| Rmet_1162 | <i>rpml</i> | Op0333f | 0.63 | 2.97 | <b>0.48</b> | 13.82 | Q1LP78 50S ribosomal protein L35                                 |
| Rmet_1163 | <i>rplT</i> | Op0333f | 0.62 | 4.10 | <b>0.42</b> | 14.25 | Q1LP77 50S ribosomal protein L20                                 |

|           |             |         |      |      |             |       |                                                      |
|-----------|-------------|---------|------|------|-------------|-------|------------------------------------------------------|
| Rmet_1212 |             | Op0352r | 0.51 | 1.06 | <b>0.46</b> | 5.31  | Q1LP28 Aldo/keto reductase                           |
| Rmet_1213 | <i>pyrD</i> | Op0352r | 0.83 | 0.65 | <b>0.48</b> | 3.37  | Q1LP27 Dihydroorotate dehydrogenase                  |
| Rmet_1216 | <i>aat</i>  | Op0354r | 0.53 | 4.26 | <b>0.47</b> | 14.56 | Q1LP24 Leucyl/phenylalanyl-tRNA--protein transferase |
| Rmet_1217 |             | Op0354r | 0.79 | 0.85 | <b>0.42</b> | 4.14  | Q1LP23 NUDIX hydrolase                               |
| Rmet_1363 |             | Op0383f | 0.67 | 1.53 | <b>0.42</b> | 1.17  | Q1LNN0 Putative signal peptide protein               |
| Rmet_1419 |             | Op0398r | 0.63 | 1.43 | <b>0.47</b> | 2.29  | Q1LNH4 Modification methylase, HemK family           |
| Rmet_1435 | <i>rpsB</i> | Op0403f | 0.77 | 0.55 | <b>0.37</b> | 10.15 | Q1LNF8 30S ribosomal protein S2                      |
| Rmet_1437 | <i>pyrH</i> | Op0403f | 0.51 | 2.21 | <b>0.49</b> | 8.39  | Q1LNF6 Uridylate kinase                              |

| <b>CMGI-3</b> |               |         |      |      |             |       |                                                   |
|---------------|---------------|---------|------|------|-------------|-------|---------------------------------------------------|
| Rmet_1463     | <i>guaA</i>   | Op0409f | 0.70 | 1.98 | <b>0.45</b> | 6.62  | Q1LND0 GMP synthase (Glutamine-hydrolyzing)       |
| Rmet_1466     |               | Op0411f | 0.56 | 1.59 | <b>0.42</b> | 4.13  | Q1LNC7 Putative uncharacterized protein           |
| Rmet_1468     |               | Op0412r | 0.55 | 2.01 | <b>0.36</b> | 9.30  | Q1LNC5 Phage transcriptional regulator, AlpA      |
| Rmet_1470     |               | Op0412r | 0.71 | 0.62 | <b>0.39</b> | 5.62  | Q1LNC3 Putative uncharacterized protein           |
| Rmet_1471     |               | Op0412r | 0.60 | 1.22 | <b>0.36</b> | 7.37  | Q1LNC2 Putative uncharacterized protein           |
| Rmet_1472     |               | Op0412r | 0.63 | 0.80 | <b>0.35</b> | 33.59 | Q1LNC1 KAP P-loop                                 |
| Rmet_1473     |               | Op0412r | 0.58 | 1.25 | <b>0.27</b> | 6.24  | Q1LNC0 Retron reverse transcriptase               |
| Rmet_1474     |               | Op0412r | 0.56 | 3.18 | <b>0.26</b> | 13.76 | Q1LNB9 Putative uncharacterized protein           |
| Rmet_1572     | <i>ptpS</i>   | Op0433f | 0.53 | 2.20 | <b>0.40</b> | 5.03  | Q1LN21 Putative uncharacterized protein           |
| Rmet_1576     |               | Op0434r | 0.73 | 0.69 | <b>0.45</b> | 8.07  | Q1LN17 Putative proline-rich protein              |
| Rmet_1732     |               | Op0491f | 0.52 | 2.34 | <b>0.43</b> | 8.92  | Q1LML5 Transcriptional regulator, AraC family     |
| Rmet_1812     |               | Op0526r | 0.66 | 1.22 | <b>0.48</b> | 6.21  | Q1LMD5 Rieske (2Fe-2S) region                     |
| Rmet_1834     |               | Op0533f | 0.62 | 1.37 | <b>0.49</b> | 3.48  | Q1LMB3 Transcriptional regulator, GntR family     |
| Rmet_1931     | <i>amaB-2</i> | Op0564r | 0.55 | 5.23 | <b>0.49</b> | 11.59 | Q1LM16 Amidase, hydantoinase/carbamoylase         |
| Rmet_1946     |               | Op0570r | 0.51 | 4.55 | <b>0.43</b> | 10.12 | Q1LM01 Putative transmembrane protein             |
| Rmet_1973     | <i>pitA</i>   | Op0576r | 0.64 | 1.76 | <b>0.43</b> | 89.36 | Q1LLX4 Phosphate transporter                      |
| Rmet_1981     |               | Op0577f | 0.59 | 2.77 | <b>0.39</b> | 3.64  | Q1LLW6 LexA repressor                             |
| Rmet_1982     |               | Op0577f | 0.59 | 4.39 | <b>0.37</b> | 4.28  | Q1LLW5 Putative uncharacterized protein           |
| Rmet_1983     |               | Op0578r | 0.78 | 1.20 | <b>0.41</b> | 11.84 | Q1LLW4 Putative uncharacterized protein           |
| Rmet_2024     |               | Op0592r | 0.88 | 0.23 | <b>0.49</b> | 2.46  | Q1LLS3 GTP-binding protein TypA                   |
| Rmet_2033     |               | Op0594r | 1.06 | 0.55 | <b>0.43</b> | 8.01  | Q1LLR4 UPF0090 protein Rmet_2033                  |
| Rmet_2039     |               | Op0596r | 0.73 | 0.74 | <b>0.50</b> | 3.31  | Q1LLQ8 Putative uncharacterized protein           |
| Rmet_2044     | <i>ccoN</i>   | Op0596r | 0.72 | 1.66 | <b>0.48</b> | 11.06 | Q1LLQ3 Cytochrome c oxidase, cbb3-type, subunit I |
| Rmet_2133     |               | Op0614r | 0.82 | 0.48 | <b>0.45</b> | 6.20  | Q1LLG4 Putative uncharacterized protein           |
| Rmet_2136     |               | Op0615f | 0.54 | 2.28 | <b>0.48</b> | 4.09  | Q1LLG1 Putative uncharacterized protein           |

|           |                     |      |      |             |       |                                                      |
|-----------|---------------------|------|------|-------------|-------|------------------------------------------------------|
| Rmet_2137 | Op0615f             | 0.90 | 0.53 | <b>0.47</b> | 6.93  | Q1LLG0 50S ribosomal protein L31 type B              |
| Rmet_2138 | Op0615f             | 0.83 | 1.82 | <b>0.46</b> | 4.61  | Q1LLF9 Putative inner membrane transmembrane protein |
| Rmet_2139 | Op0615f             | 0.52 | 4.50 | <b>0.40</b> | 4.60  | Q1LLF8 MATE efflux family protein                    |
| Rmet_2141 | Op0617f             | 0.64 | 4.32 | <b>0.43</b> | 15.96 | Q1LLF6 Patatin                                       |
| Rmet_2174 | Op0625f             | 0.56 | 1.13 | <b>0.44</b> | 4.00  | Q1LLC3 Translation initiation factor IF-1 1          |
| Rmet_2177 | <i>ppx</i> Op0626r  | 0.54 | 1.16 | <b>0.37</b> | 5.00  | Q1LLC0 Ppx/GppA phosphatase                          |
| Rmet_2193 | <i>carB</i> Op0630r | 0.71 | 0.85 | <b>0.43</b> | 3.54  | Q1LLA4 Carbamoyl-phosphate synthase large subunit    |
| Rmet_2194 | Op0630r             | 0.72 | 0.89 | <b>0.47</b> | 12.73 | Q1LLA3 Lysine exporter protein (LYSE/YGGA)           |
| Rmet_2195 | <i>carA</i> Op0630r | 0.61 | 1.58 | <b>0.32</b> | 8.25  | Q1LLA2 Carbamoyl-phosphate synthase small subunit    |
| Rmet_2210 | Op0632r             | 0.65 | 1.06 | <b>0.47</b> | 1.73  | Q1LL87 Putative uncharacterized protein              |
| Rmet_2212 | Op0633f             | 0.59 | 2.44 | <b>0.46</b> | 5.20  | Q1LL85 UspA                                          |
| Rmet_2264 | Op0645f             | 0.90 | 0.45 | <b>0.50</b> | 1.69  | Q1LL33 Putative uncharacterized protein              |
| Rmet_2265 | Op0646r             | 0.73 | 1.27 | <b>0.48</b> | 3.85  | Q1LL32 Putative uncharacterized protein              |
| Rmet_2266 | Op0647f             | 0.61 | 1.79 | <b>0.50</b> | 2.56  | Q1LL31 Putative uncharacterized protein              |
| Rmet_2273 | <i>fumA</i> Op0649f | 0.65 | 2.66 | <b>0.50</b> | 12.19 | Q1LL24 Fumarase                                      |
| Rmet_2274 | <i>murl</i> Op0649f | 1.08 | 0.66 | <b>0.47</b> | 3.21  | Q1LL23 Glutamate racemase                            |
| Rmet_2286 | Op0654r             | 0.90 | 0.23 | <b>0.44</b> | 2.42  | Q1LL11 Putative uncharacterized protein              |
| Rmet_2300 | Op0656r             | 0.50 | 2.18 | <b>0.48</b> | 3.83  | Q1LKZ7 Putative uncharacterized protein              |
| Rmet_2339 | Op0662r             | 0.54 | 1.38 | <b>0.44</b> | 12.29 | Q8GQ48 Putative uncharacterized protein ORF C62      |
| Rmet_2340 | Op0662r             | 0.64 | 1.18 | <b>0.45</b> | 5.40  | Q8GQ49 Putative uncharacterized protein ORF C61      |
| Rmet_2341 | Op0662r             | 0.62 | 1.29 | <b>0.38</b> | 10.01 | Q1LKV8 Putative uncharacterized protein              |
| Rmet_2342 | Op0662r             | 0.64 | 0.92 | <b>0.38</b> | 4.14  | A0H9A7 AAA ATPase, central region                    |
| Rmet_2424 | Op0680r             | 0.87 | 0.41 | <b>0.47</b> | 5.34  | Q1LKM5 Anti sigma-E protein RseA                     |
| Rmet_2432 | <i>rpmF</i> Op0680r | 1.08 | 0.17 | <b>0.46</b> | 3.97  | Q1LKL7 50S ribosomal protein L32                     |
| Rmet_2433 | Op0680r             | 0.67 | 0.77 | <b>0.29</b> | 6.15  | Q1LKL6 Putative uncharacterized protein              |
| Rmet_2441 | <i>moaA</i> Op0683f | 0.73 | 2.47 | <b>0.50</b> | 3.46  | Q1LKK8 GTP cyclohydrolase subunit MoaA               |
| Rmet_2454 | Op0685f             | 0.60 | 0.92 | <b>0.47</b> | 2.02  | Q1LKJ5 Lysine exporter protein (LYSE/YGGA)           |
| Rmet_2461 | Op0688r             | 0.55 | 0.84 | <b>0.44</b> | 1.40  | Q1LKI8 Colicin V production protein                  |
| Rmet_2484 | <i>sdhA</i> Op0688r | 0.90 | 0.16 | <b>0.45</b> | 3.01  | Q1LKG5 Succinate dehydrogenase subunit A             |
| Rmet_2485 | <i>sdhD</i> Op0688r | 0.84 | 0.26 | <b>0.36</b> | 6.78  | Q1LKG4 Succinate dehydrogenase subunit D             |
| Rmet_2486 | <i>sdhC</i> Op0688r | 0.69 | 1.00 | <b>0.28</b> | 6.73  | Q1LKG3 Succinate dehydrogenase subunit C             |
| Rmet_2487 | Op0688r             | 0.71 | 1.58 | <b>0.38</b> | 5.48  | Q1LKG2 Putative uncharacterized protein              |
| Rmet_2547 | Op0707f             | 0.72 | 1.31 | <b>0.50</b> | 2.79  | Q1LKA2 Proline hydroxylase-like protein              |
| Rmet_2564 | Op0709f             | 0.57 | 0.86 | <b>0.37</b> | 5.09  | Q1LK85 DEAD/DEAH box helicase-like protein           |

|           |                     |      |      |             |       |                                                                                                      |
|-----------|---------------------|------|------|-------------|-------|------------------------------------------------------------------------------------------------------|
| Rmet_2567 | Op0711f             | 0.61 | 0.64 | <b>0.45</b> | 3.40  | Q1LK82 Integral membrane protein TerC                                                                |
| Rmet_2579 | Op0716r             | 0.53 | 6.69 | <b>0.35</b> | 3.34  | Q1LK70 Pirin-like protein                                                                            |
| Rmet_2618 | Op0733f             | 0.65 | 0.81 | <b>0.50</b> | 4.31  | Q1LK31 Rieske (2Fe-2S) region<br>Q1LJW8 Putative type 4 fimbrial biogenesis PilY1-related<br>protein |
| Rmet_2685 | Op0757f             | 0.60 | 1.89 | <b>0.43</b> | 3.13  | protein                                                                                              |
| Rmet_2694 | <i>ribH</i> Op0759f | 0.57 | 3.78 | <b>0.49</b> | 3.67  | Q1LJV9 6,7-dimethyl-8-ribityllumazine synthase                                                       |
| Rmet_2704 | <i>trmB</i> Op0765f | 0.63 | 1.24 | <b>0.47</b> | 2.97  | Q1LJU9 tRNA (guanine-N(7)-)-methyltransferase                                                        |
| Rmet_2723 | Op0770r             | 0.64 | 1.42 | <b>0.45</b> | 5.13  | Q1LJT0 Polysaccharide biosynthesis protein CapD                                                      |
| Rmet_2740 | <i>pyrB</i> Op0772r | 0.66 | 1.03 | <b>0.48</b> | 2.46  | Q1LJR3 Aspartate carbamoyltransferase                                                                |
| Rmet_2771 | Op0778r             | 0.52 | 2.46 | <b>0.48</b> | 2.83  | Q1LJN2 Putative uncharacterized protein                                                              |
| Rmet_2796 | Op0786r             | 0.65 | 0.89 | <b>0.43</b> | 2.34  | Q1LJK7 Uncharacterized protein UPF0065                                                               |
| Rmet_2860 | Op0804r             | 0.76 | 0.62 | <b>0.48</b> | 11.11 | Q1LJE3 NAD-dependent epimerase/dehydratase                                                           |
| Rmet_2870 | <i>rpmB</i> Op0807f | 1.17 | 0.14 | <b>0.46</b> | 2.41  | Q1LJD3 50S ribosomal protein L28                                                                     |
| Rmet_2871 | <i>rpmG</i> Op0807f | 0.89 | 0.21 | <b>0.45</b> | 2.37  | Q1LJD2 50S ribosomal protein L33                                                                     |
| Rmet_2872 | <i>nadB</i> Op0807f | 0.71 | 1.31 | <b>0.45</b> | 4.39  | Q1LJD1 L-aspartate oxidase<br>Q1LJD0 Nicotinate-nucleotide pyrophosphorylase<br>(Carboxylating)      |
| Rmet_2873 | <i>nadC</i> Op0808r | 0.72 | 1.05 | <b>0.44</b> | 5.36  | (Carboxylating)                                                                                      |
| Rmet_2874 | <i>nadA</i> Op0808r | 0.57 | 1.24 | <b>0.33</b> | 7.74  | Q1LJC9 Quinolinate synthetase A                                                                      |
| Rmet_2877 | Op0808r             | 0.69 | 1.14 | <b>0.41</b> | 3.26  | Q1LJC6 Fmu (Sun)                                                                                     |
| Rmet_2882 | Op0810r             | 0.57 | 3.36 | <b>0.49</b> | 2.81  | Q1LJC1 Putative uncharacterized protein                                                              |
| Rmet_2897 | Op0815f             | 0.61 | 0.69 | <b>0.28</b> | 2.51  | Q1LJA6 Putative uncharacterized protein                                                              |
| Rmet_2903 | Op0819f             | 0.71 | 0.83 | <b>0.44</b> | 5.78  | Q1LJA0 Putative uncharacterized protein                                                              |
| Rmet_3050 | <i>pyrF</i> Op0858r | 0.53 | 2.52 | <b>0.49</b> | 6.45  | Q1LIV4 Orotidine 5'-phosphate decarboxylase                                                          |
| Rmet_3070 | Op0861f             | 0.89 | 0.16 | <b>0.48</b> | 3.13  | Q1LIT4 17 kDa surface antigen                                                                        |
| Rmet_3084 | <i>rdgC</i> Op0867f | 0.65 | 1.16 | <b>0.22</b> | 5.47  | Q1LIS0 Putative exonuclease, RdgC                                                                    |
| Rmet_3085 | Op0868r             | 0.50 | 2.25 | <b>0.16</b> | 9.60  | Q1LIR9 Alcohol dehydrogenase, zinc-binding                                                           |
| Rmet_3105 | <i>rpmA</i> Op0874r | 1.14 | 0.27 | <b>0.39</b> | 6.65  | Q1LIP9 50S ribosomal protein L27                                                                     |
| Rmet_3106 | <i>rplU</i> Op0874r | 1.16 | 0.72 | <b>0.46</b> | 5.57  | Q1LIP8 50S ribosomal protein L21                                                                     |
| Rmet_3108 | Op0875f             | 0.54 | 3.66 | <b>0.47</b> | 2.86  | Q1LIP6 Type II secretion system protein E                                                            |
| Rmet_3109 | Op0875f             | 0.66 | 1.83 | <b>0.48</b> | 4.04  | Q1LIP5 Type II secretion system protein<br>Q1LIP4 Type 4 prepilin peptidase 1. Aspartic peptidase.   |
| Rmet_3110 | Op0875f             | 0.73 | 1.74 | <b>0.46</b> | 7.65  | MEROPS family A24A                                                                                   |
| Rmet_3114 | Op0876r             | 0.53 | 2.60 | <b>0.47</b> | 2.25  | Q1LIP0 Oligopeptide transporter OPT                                                                  |
| Rmet_3115 | Op0876r             | 0.63 | 1.15 | <b>0.47</b> | 4.33  | Q1LIN9 NUDIX hydrolase                                                                               |

|           |                     |      |      |             |       |                                                                                                                    |
|-----------|---------------------|------|------|-------------|-------|--------------------------------------------------------------------------------------------------------------------|
| Rmet_3151 | Op0882r             | 0.55 | 1.92 | <b>0.38</b> | 12.48 | Q1LIK3 Molybdopterin oxidoreductase                                                                                |
| Rmet_3153 | Op0883f             | 0.70 | 1.06 | <b>0.49</b> | 2.33  | Q1LIK1 Extracellular ligand-binding receptor<br>Q1LIK0 Oligopeptide/dipeptide ABC transporter, ATP-binding protein |
| Rmet_3154 | Op0884r             | 0.66 | 2.07 | <b>0.49</b> | 2.94  |                                                                                                                    |
| Rmet_3178 | <i>trpE</i> Op0893f | 0.66 | 0.76 | <b>0.34</b> | 2.79  | Q1LIH6 Anthranilate synthase, component I                                                                          |
| Rmet_3179 | <i>trpG</i> Op0893f | 0.55 | 7.54 | <b>0.43</b> | 37.90 | Q1LIH5 Anthranilate synthase, component II                                                                         |
| Rmet_3200 | <i>hemA</i> Op0901f | 0.84 | 0.39 | <b>0.48</b> | 3.10  | Q1LIF4 Glutamyl-tRNA reductase                                                                                     |
| Rmet_3201 | <i>prfA</i> Op0901f | 0.64 | 3.19 | <b>0.47</b> | 6.55  | Q1LIF3 Peptide chain release factor 1                                                                              |
| Rmet_3205 | <i>ubiX</i> Op0901f | 0.59 | 1.49 | <b>0.46</b> | 1.72  | Q1LIE9 3-octaprenyl-4-hydroxybenzoate carboxy-lyase                                                                |
| Rmet_3209 | Op0903f             | 0.52 | 1.47 | <b>0.47</b> | 3.36  | Q1LIE5 Transcriptional regulator, AsnC family<br>Q1LIA2 ABC-type multidrug transport system permease component     |
| Rmet_3252 | Op0918r             | 0.70 | 1.44 | <b>0.49</b> | 3.38  |                                                                                                                    |
| Rmet_3274 | <i>mrcA</i> Op0921f | 0.63 | 2.40 | <b>0.46</b> | 2.87  | Q1LI80 Penicillin-binding protein 1A                                                                               |
| Rmet_3284 | Op0924r             | 0.88 | 0.37 | <b>0.48</b> | 6.82  | Q1LI70 Cytochrome c, class I                                                                                       |
| Rmet_3297 | <i>secY</i> Op0926r | 0.85 | 0.21 | <b>0.48</b> | 4.13  | Q1LI57 Preprotein translocase secY subunit                                                                         |
| Rmet_3298 | <i>rplO</i> Op0926r | 0.91 | 0.11 | <b>0.49</b> | 5.47  | Q1LI56 50S ribosomal protein L15                                                                                   |
| Rmet_3301 | <i>rplR</i> Op0926r | 0.95 | 0.05 | <b>0.48</b> | 4.50  | Q1LI53 50S ribosomal protein L18                                                                                   |
| Rmet_3302 | <i>rplF</i> Op0926r | 0.61 | 0.51 | <b>0.37</b> | 6.95  | Q1LI52 50S ribosomal protein L6                                                                                    |
| Rmet_3303 | <i>rpsH</i> Op0926r | 0.89 | 0.12 | <b>0.44</b> | 7.95  | Q1LI51 30S ribosomal protein S8                                                                                    |
| Rmet_3304 | <i>rpsN</i> Op0926r | 1.32 | 0.28 | <b>0.46</b> | 4.68  | Q1LI50 SSU ribosomal protein S14P                                                                                  |
| Rmet_3305 | <i>rplE</i> Op0926r | 1.51 | 0.44 | <b>0.44</b> | 5.27  | Q1LI49 50S ribosomal protein L5                                                                                    |
| Rmet_3306 | <i>rplX</i> Op0926r | 0.96 | 0.04 | <b>0.28</b> | 6.66  | Q1LI48 50S ribosomal protein L24                                                                                   |
| Rmet_3307 | <i>rplN</i> Op0926r | 0.82 | 0.29 | <b>0.26</b> | 8.11  | Q1LI47 50S ribosomal protein L14                                                                                   |
| Rmet_3314 | <i>rplB</i> Op0926r | 1.25 | 0.23 | <b>0.50</b> | 4.25  | Q1LI40 50S ribosomal protein L2                                                                                    |
| Rmet_3317 | <i>rplC</i> Op0926r | 1.07 | 0.08 | <b>0.46</b> | 2.90  | Q1LI37 50S ribosomal protein L3                                                                                    |
| Rmet_3324 | Op0928r             | 1.30 | 0.29 | <b>0.43</b> | 10.18 | Q1LI13 Elongation factor Tu                                                                                        |
| Rmet_3336 | <i>rplJ</i> Op0930r | 0.99 | 0.02 | <b>0.48</b> | 4.10  | Q1LI18 50S ribosomal protein L10                                                                                   |
| Rmet_3337 | <i>rplA</i> Op0930r | 0.92 | 0.16 | <b>0.43</b> | 7.16  | Q1LI17 50S ribosomal protein L1                                                                                    |
| Rmet_3338 | <i>rplK</i> Op0930r | 1.17 | 0.19 | <b>0.39</b> | 5.33  | Q1LI16 50S ribosomal protein L11                                                                                   |
| Rmet_3339 | <i>nusG</i> Op0930r | 1.02 | 0.04 | <b>0.37</b> | 7.51  | Q1LI15 Transcription antitermination protein nusG                                                                  |
| Rmet_3340 | <i>secE</i> Op0930r | 0.90 | 0.63 | <b>0.45</b> | 8.54  | Q1LI14 Protein translocase subunit secE/sec61 gamma                                                                |
| Rmet_3346 | Op0932r             | 0.71 | 0.75 | <b>0.43</b> | 8.28  | Q1LI08 UspA                                                                                                        |

**CMGI-10**

|           |         |      |      |             |      |                                         |
|-----------|---------|------|------|-------------|------|-----------------------------------------|
| Rmet_3350 | Op0932r | 0.63 | 1.28 | <b>0.43</b> | 3.69 | Q1LI04 Putative uncharacterized protein |
|-----------|---------|------|------|-------------|------|-----------------------------------------|



| Rmet_3353 | Op0934r             | 0.67 | 1.21 | 0.49 | 20.36 | Q9F8S6 Transposase (Transposase, IS4 family)                         |
|-----------|---------------------|------|------|------|-------|----------------------------------------------------------------------|
|           |                     |      |      |      |       | Q1LHX4 Putative signal transduction protein with EFhand domain       |
| Rmet_3380 | Op0940r             | 0.67 | 0.88 | 0.48 | 3.47  |                                                                      |
| Rmet_3381 | <i>gspC</i> Op0940r | 0.59 | 1.09 | 0.38 | 4.27  | Q1LHX3 Putative uncharacterized protein                              |
| Rmet_3396 | Op0943f             | 0.81 | 1.13 | 0.49 | 12.24 | Q1LHV8 Pyruvate ferredoxin/ferredoxin oxidoreductase                 |
|           |                     |      |      |      |       | Q1LHS8 Sulfide dehydrogenase (Flavocytochrome), flavoprotein subunit |
| Rmet_3426 | Op0950r             | 0.62 | 2.95 | 0.49 | 10.10 |                                                                      |
| Rmet_3427 | Op0950r             | 0.62 | 1.76 | 0.48 | 4.69  | Q1LHS7 Cytochrome c, class I                                         |
| Rmet_3428 | Op0950r             | 0.60 | 3.33 | 0.48 | 2.79  | Q1LHS6 Transport-associated                                          |
| Rmet_3480 | <i>gcvT</i> Op0969f | 0.56 | 1.52 | 0.43 | 3.74  | Q1LHM4 Aminomethyltransferase                                        |
| Rmet_3545 | Op0983f             | 0.58 | 4.20 | 0.46 | 3.69  | Q1LHF9 UMUC-like DNA-repair protein                                  |
| Rmet_3612 | Op1004r             | 0.66 | 0.82 | 0.49 | 0.95  | Q1LH92 Methyltransferase type 11                                     |
| Rmet_3614 | Op1004r             | 0.80 | 0.72 | 0.49 | 4.64  | Q1LH90 UPF0161 protein Rmet_3614                                     |
| Rmet_3617 | Op1006f             | 0.56 | 4.10 | 0.34 | 5.76  | Q1LH87 Excinuclease ABC, C subunit-like protein                      |
| Rmet_3618 | Op1007r             | 0.52 | 1.44 | 0.27 | 4.44  | Q1LH86 OsmC-like protein                                             |
| Rmet_3620 | Op1008f             | 0.62 | 2.14 | 0.39 | 36.02 | Q1LH84 Peptidase S1C, Do                                             |
| Rmet_3621 | Op1008f             | 0.77 | 0.97 | 0.49 | 3.85  | Q1LH83 Putative uncharacterized protein                              |
| Rmet_3622 | Op1009r             | 0.74 | 0.50 | 0.35 | 5.41  | Q1LH82 Major facilitator superfamily MFS_1                           |
| Rmet_3624 | Op1009r             | 0.54 | 4.25 | 0.43 | 4.38  | Q1LH80 Transglutaminase-like protein                                 |
|           |                     |      |      |      |       | Q1LH78 ATPase associated with various cellular activities, AAA_3     |
| Rmet_3626 | Op1009r             | 0.56 | 2.68 | 0.41 | 4.35  |                                                                      |
| Rmet_3678 | Op1026f             | 0.51 | 1.67 | 0.46 | 3.47  | Q1LH26 Methyl-accepting chemotaxis sensory transducer                |
|           |                     |      |      |      |       | Q1LH24 Response regulator receiver domain protein (CheY-like)        |
| Rmet_3680 | Op1026f             | 0.54 | 2.80 | 0.44 | 8.51  |                                                                      |
| Rmet_3683 | Op1026f             | 0.50 | 1.72 | 0.42 | 2.95  | Q1LH21 Methyl-accepting chemotaxis sensory transducer                |
| Rmet_3689 | <i>cheA</i> Op1026f | 0.61 | 2.19 | 0.49 | 3.26  | Q1LH15 CheA signal transduction histidine kinases                    |
| Rmet_3690 | <i>cheW</i> Op1026f | 0.52 | 2.24 | 0.49 | 7.65  | Q1LH14 CheW protein                                                  |
|           |                     |      |      |      |       | Q1LH12 Probable chemoreceptor glutamine deamidase                    |
| Rmet_3692 | <i>cheD</i> Op1026f | 0.62 | 1.72 | 0.50 | 4.13  | <i>cheD</i>                                                          |
| Rmet_3695 | <i>cheZ</i> Op1026f | 0.57 | 2.38 | 0.50 | 2.96  | Q1LH09 Chemotaxis phosphatase, CheZ                                  |
| Rmet_3703 | Op1026f             | 0.51 | 1.93 | 0.47 | 1.86  | Q1LH01 Flagellar FlhE                                                |
| Rmet_3721 | Op1035r             | 0.56 | 1.60 | 0.49 | 3.11  | Q1LGY3 Uncharacterized protein UPF0065                               |
| Rmet_3734 | <i>flgB</i> Op1042f | 0.51 | 1.03 | 0.33 | 4.84  | Q1LGX0 Flagellar basal-body rod protein FlgB                         |
| Rmet_3739 | <i>flgG</i> Op1042f | 0.51 | 1.25 | 0.41 | 3.53  | Q1LGW5 Flagellar basal-body rod FlgG                                 |

|           |              |         |      |       |             |       |                                                      |
|-----------|--------------|---------|------|-------|-------------|-------|------------------------------------------------------|
| Rmet_3740 | <i>flgH</i>  | Op1042f | 0.51 | 1.72  | <b>0.45</b> | 2.77  | Q1LGW4 Flagellar L-ring protein                      |
|           |              |         |      |       |             |       | Q1LGW2 Mannosyl-glycoprotein endo-beta-N-            |
| Rmet_3742 | <i>flgJ</i>  | Op1042f | 0.51 | 2.12  | <b>0.46</b> | 7.29  | acetylglucosamidase                                  |
| Rmet_3894 |              | Op1086f | 0.72 | 0.82  | <b>0.48</b> | 1.49  | Q1LGG4 Putative uncharacterized protein              |
| Rmet_3904 |              | Op1092f | 0.54 | 1.58  | <b>0.44</b> | 1.68  | Q1LGF4 Putative serine protein kinase, PrkA          |
| Rmet_4119 |              | Op1160f | 0.60 | 1.37  | <b>0.21</b> | 8.14  | Q1LFU0 Putative uncharacterized protein              |
| Rmet_4127 |              | Op1163r | 0.66 | 0.70  | <b>0.42</b> | 8.42  | Q1LFT2 Putative uncharacterized protein              |
| Rmet_4199 |              | Op1190f | 0.59 | 16.36 | <b>0.48</b> | 5.57  | Q1LFL0 FAD-binding 9, siderophore-interacting        |
| Rmet_4206 |              | Op1192f | 0.61 | 2.70  | <b>0.48</b> | 4.82  | Q1LFK3 Transcriptional regulator, LysR family        |
| Rmet_4245 |              | Op1202f | 0.56 | 5.31  | <b>0.41</b> | 6.34  | Q1LFG5 Transcriptional regulator, LysR family        |
| Rmet_4246 |              | #NV     | 0.71 | 2.28  | <b>0.44</b> | 4.58  | Q1LFG4 Putative uncharacterized protein              |
| Rmet_4426 |              | Op1259r | 0.65 | 2.13  | <b>0.50</b> | 3.24  | Q1LEY5 MmgE/PrpD family protein                      |
| Rmet_4433 |              | Op1262f | 0.55 | 2.83  | <b>0.49</b> | 2.65  | Q1LEX8 Uncharacterized protein UPF0065               |
| Rmet_4464 |              | Op1273r | 0.62 | 1.60  | <b>0.48</b> | 2.68  | Q1LEU7 Putative uncharacterized protein              |
| Rmet_4466 | <i>czcS2</i> | Op1274f | 0.50 | 3.33  | <b>0.49</b> | 11.93 | Q1LEU5 Sensor protein                                |
| Rmet_4524 |              | Op1297r | 0.54 | 1.55  | <b>0.38</b> | 6.02  | Q1LEN7 Negative transcriptional regulator            |
| Rmet_4561 |              | Op1311r | 0.55 | 2.55  | <b>0.42</b> | 1.82  | Q1LEK3 Transcriptional regulator, AsnC family        |
| Rmet_4565 |              | Op1314f | 0.58 | 2.13  | <b>0.25</b> | 1.34  | Q1LEJ9 TonB-dependent receptor                       |
| Rmet_4566 |              | Op1315r | 0.62 | 2.06  | <b>0.30</b> | 1.35  | Q1LEJ8 Putative uncharacterized protein              |
| Rmet_4592 |              | Op1320f | 0.52 | 6.40  | <b>0.42</b> | 3.91  | Q1LEH2 NAD-dependent epimerase/dehydratase           |
| Rmet_4594 | <i>zntA</i>  | Op1321r | 0.58 | 2.41  | <b>0.48</b> | 3.72  | Q1LEH0 Heavy metal translocating P-type ATPase       |
| Rmet_4602 |              | Op1324f | 0.51 | 3.64  | <b>0.46</b> | 6.10  | Q1LEG2 Transcriptional regulators, TraR/DksA family  |
|           |              |         |      |       |             |       | Q1LED7 Two component transcriptional regulator, LuxR |
| Rmet_4627 |              | Op1333r | 0.51 | 3.99  | <b>0.50</b> | 2.43  | family                                               |
| Rmet_4761 |              | Op1386f | 0.53 | 1.16  | <b>0.45</b> | 5.60  | Q1LE03 Putative uncharacterized protein              |
| Rmet_4775 |              | Op1388f | 0.63 | 3.62  | <b>0.39</b> | 8.91  | Q1LDY9 Extracellular ligand-binding receptor         |
| Rmet_4802 |              | Op1396f | 0.64 | 1.64  | <b>0.50</b> | 3.11  | Q1LDW2 Putative uncharacterized protein              |
| Rmet_4806 |              | Op1398f | 0.61 | 2.18  | <b>0.50</b> | 8.75  | Q1LDV8 Transcriptional regulator, XRE family         |
| Rmet_4809 | <i>acpA</i>  | Op1400f | 0.55 | 1.48  | <b>0.49</b> | 2.12  | Q1LDV5 Phosphoesterase                               |
| Rmet_4864 |              | Op1419r | 1.90 | 2.95  | <b>0.49</b> | 1.08  | Q1LDQ0 Putative uncharacterized protein              |
| Rmet_4880 |              | Op1427r | 0.54 | 1.69  | <b>0.49</b> | 21.77 | Q1LDN4 Transcriptional regulator, LysR family        |
| Rmet_4893 |              | Op1431r | 0.63 | 3.12  | <b>0.47</b> | 2.94  | Q1LDM1 Putative uncharacterized protein              |
| Rmet_4954 |              | Op1455r | 0.52 | 1.47  | <b>0.48</b> | 2.65  | Q1LDG0 Transcriptional regulator, GntR family        |
| Rmet_4975 |              | Op1460f | 0.61 | 1.15  | <b>0.45</b> | 4.34  | Q1LDD9 Resolvase-like protein                        |

|           |                      |      |       |             |       |                                                                 |
|-----------|----------------------|------|-------|-------------|-------|-----------------------------------------------------------------|
| Rmet_4976 | Op1461r              | 0.60 | 1.60  | <b>0.47</b> | 9.15  | Q1LDD8 Putative uncharacterized protein                         |
| Rmet_5005 | Op1469r              | 0.66 | 1.66  | <b>0.46</b> | 5.36  | Q1LDA9 Isochorismatase hydrolase                                |
| Rmet_5006 | Op1469r              | 0.66 | 1.94  | <b>0.43</b> | 7.67  | Q1LDA8 Putative uncharacterized protein                         |
| Rmet_5076 | Op1494f              | 0.56 | 7.04  | <b>0.42</b> | 4.24  | A5FF57 Sulfatase                                                |
| Rmet_5077 | Op1495r              | 0.57 | 2.56  | <b>0.32</b> | 6.70  | A5FF57 Sulfatase                                                |
| Rmet_5080 | Op1496f              | 0.71 | 2.01  | <b>0.49</b> | 2.76  | Q1LD37 Putative uncharacterized protein                         |
| Rmet_5081 | Op1496f              | 0.53 | 4.06  | <b>0.49</b> | 5.25  | Q1LD36 Putative uncharacterized protein                         |
| Rmet_5140 | Op1515r              | 0.52 | 1.89  | <b>0.43</b> | 4.10  | Q1LCX7 AMP-dependent synthetase and ligase                      |
| Rmet_5213 | Op1535r              | 0.64 | 1.92  | <b>0.44</b> | 4.04  | Q1LCQ4 Transcriptional regulator, GntR family                   |
| Rmet_5297 | Op1566f              | 0.58 | 1.77  | <b>0.37</b> | 3.64  | Q1LCH0 Flagellar basal body-associated protein FliL             |
| Rmet_5301 | <i>fliP</i> Op1566f  | 0.51 | 3.99  | <b>0.47</b> | 2.44  | Q1LCG6 Flagellar biosynthetic protein FliP                      |
| Rmet_5344 | Op1586f              | 0.79 | 1.25  | <b>0.49</b> | 1.75  | Q1LCC3 Putative uncharacterized protein                         |
| Rmet_5385 | Op1602f              | 0.59 | 4.51  | <b>0.34</b> | 6.40  | Q1LC82 Putative uncharacterized protein                         |
| Rmet_5427 | Op1614f              | 0.50 | 1.52  | <b>0.47</b> | 2.21  | Q1LC40 Putative uncharacterized protein                         |
| Rmet_5475 | Op1626f              | 0.55 | 2.25  | <b>0.46</b> | 2.86  | Q1LBZ2 Putative uncharacterized protein                         |
| Rmet_5507 | Op1639r              | 0.52 | 2.25  | <b>0.44</b> | 6.69  | Q1LBW0 Acyl-CoA dehydrogenase-like protein                      |
| Rmet_5534 | Op1645r              | 0.51 | 3.68  | <b>0.41</b> | 2.13  | Q1LBT3 2-nitropropane dioxygenase, NPD                          |
| Rmet_5547 | Op1647r              | 0.51 | 2.26  | <b>0.50</b> | 3.19  | Q1LBS0 Transcriptional regulator, LuxR family                   |
| Rmet_5549 | Op1648f              | 0.51 | 2.69  | <b>0.50</b> | 2.44  | Q1LBR8 Ferredoxin                                               |
| Rmet_5572 | Op1657r              | 0.53 | 1.26  | <b>0.44</b> | 3.56  | Q1LBP5 Dyp-type peroxidase                                      |
| Rmet_5594 | Op1666f              | 0.54 | 1.97  | <b>0.45</b> | 3.06  | Q1LBM3 Putative uncharacterized protein                         |
| Rmet_5642 | <i>fliD3</i> Op1683r | 0.50 | 2.45  | <b>0.44</b> | 3.92  | Q1LBH5 Flagellar hook-associated 2-like protein                 |
| Rmet_5686 | Op1698f              | 0.60 | 1.33  | <b>0.44</b> | 6.80  | Q1LBD1 Tfp pilus assembly protein PilV-like protein             |
| Rmet_5763 | Op1728f              | 0.51 | 3.31  | <b>0.48</b> | 5.31  | Q1LB54 Putative uncharacterized protein                         |
| Rmet_5785 | Op1740f              | 0.53 | 1.93  | <b>0.48</b> | 2.54  | Q1LB32 Putative uncharacterized protein                         |
| Rmet_5816 | Op1756f              | 0.68 | 0.70  | <b>0.33</b> | 6.38  | Q1LB01 Cold-shock DNA-binding protein family                    |
| Rmet_5846 | Op1766f              | 0.52 | 4.86  | <b>0.44</b> | 3.70  | Q1LAX1 Putative uncharacterized protein                         |
| Rmet_5862 | Op1773r              | 0.52 | 8.19  | <b>0.47</b> | 6.21  | Q1LAV5 Putative signal peptide protein                          |
| Rmet_5868 | <i>leuC</i> Op1777r  | 0.59 | 1.52  | <b>0.45</b> | 6.10  | Q1LAU9 3-isopropylmalate dehydratase, large subunit             |
| Rmet_5935 | Op1804f              | 0.53 | 10.26 | <b>0.42</b> | 4.74  | Q1LAN2 Methyl-accepting chemotaxis sensory transducer           |
| Rmet_6068 | Op1849r              | 0.51 | 1.50  | <b>0.48</b> | 4.87  | Q58AB4 ISRme8aa1 (Transposase IS3/IS911)                        |
| Rmet_6335 | Op1926f              | 0.54 | 1.79  | <b>0.48</b> | 11.39 | Q5NUU4 ISRme2 transposase protein (Integrase, catalytic region) |

<sup>a</sup>Cells of strain  $\Delta zupT$  and its parent AE104 were confronted with 50  $\mu\text{M}$  EDTA or 10  $\mu\text{M}$  zinc chloride until the turbidity reached 100 Klett units, RNA was isolated, reversely transcribed, labeled and hybridized against a CH34-specific gene array. Provided are the Q-ratios  $\Delta zupT$ /AE104 for both treatments, red if at least 2-fold down-regulated, green up, bold-faced letters indicate significant differences, letters in italics not significant differences. The D-value for each comparison is also given. This is the distance of both mean values divided by the sum of both deviations. If  $D > 1$  (the deviation bars do not touch or overlap) the data points are different with a probability in the t-test of  $> 95\%$ . Three biological repeats for AE104, two for the mutant strain. Genes associated to catabolic metabolic genomic islands (CMGIs) are on a yellow ground and in a box.

<sup>b</sup>An operon region was defined as adjacent genes in the same direction of transcription without interruption and all genes of the *C. metallidurans* genome were assigned to operon regions Op0001f on chromosome 1 to Op1929r on pMOL28 with “f” or “r” giving the direction of transcription.

**Supplementary Table S5. Activity of *zupTp* and *cobW1p* promoters as determined with a *gfp* fusion *in trans* in various *C. metallidurans* strains<sup>a</sup>.**

|                            | <i>zupTp-gfp</i> |               |             |                         |              |             | <i>cobW1p-gfp</i> |               |             |                         |              |             |
|----------------------------|------------------|---------------|-------------|-------------------------|--------------|-------------|-------------------|---------------|-------------|-------------------------|--------------|-------------|
|                            | AE104            | $\Delta zupT$ | $\Delta e4$ | $\Delta e4 \Delta zupT$ | $\Delta zur$ | CH34        | AE104             | $\Delta zupT$ | $\Delta e4$ | $\Delta e4 \Delta zupT$ | $\Delta zur$ | CH34        |
| Basal [EDTA], ( $\mu$ M)   | <b>2.07</b>      | <b>10.15</b>  | <b>1.72</b> | <b>3.73</b>             | <b>7.21</b>  | <b>1.89</b> | 0.81              | 1.11          | 0.74        | 1.48                    | <b>5.90</b>  | 0.87        |
| 0                          | 1                | 1.00          | 1.00        | 1.00                    | 1.00         | 1.00        | 1.00              | 1.00          | 1.00        | 1.00                    | 1.00         | 1.00        |
| 1                          | 0.98             | 0.99          | 1.00        | 0.98                    | 0.95         | 0.97        | 0.94              | 1.02          | 0.88        | 1.08                    | 0.95         | 0.98        |
| 10                         | 1.12             | 1.08          | 1.01        | 1.18                    | 1.03         | 0.94        | 0.92              | 1.14          | 0.83        | <b>1.85</b>             | 0.95         | 0.97        |
| 25                         | 1.14             | 1.09          | 1.07        | <b>1.24</b>             | 1.03         | 0.98        | 0.95              | 1.19          | 0.85        | <b>1.98</b>             | 0.97         | 1.00        |
| 50                         | 1.62             | 1.14          | <b>1.55</b> | <b>1.26</b>             | 1.02         | <b>1.46</b> | 1.06              | 1.30          | 1.01        | <b>1.97</b>             | 0.98         | 0.99        |
| 100                        | <b>2.01</b>      | 1.17          | <b>2.44</b> | <b>1.44</b>             | 1.02         | <b>1.81</b> | 1.20              | <b>1.49</b>   | 1.19        | <b>2.21</b>             | 0.97         | <b>1.20</b> |
| 250                        | <b>2.63</b>      | <b>1.23</b>   | <b>3.50</b> | <b>1.64</b>             | 1.02         | <b>2.51</b> | <b>1.82</b>       | <b>1.91</b>   | <b>1.91</b> | <b>2.21</b>             | 0.98         | <b>1.97</b> |
| 500                        | <b>2.92</b>      | <b>1.23</b>   | <b>3.75</b> | <b>1.73</b>             | 1.01         | <b>2.72</b> | <b>2.76</b>       | <b>2.61</b>   | <b>2.89</b> | <b>2.18</b>             | 0.96         | <b>3.04</b> |
| 1000                       | <b>2.78</b>      | <b>1.37</b>   | <b>4.12</b> | <b>1.84</b>             | 0.96         | <b>2.63</b> | <b>2.67</b>       | <b>2.53</b>   | <b>3.27</b> | <b>2.01</b>             | 0.93         | <b>3.16</b> |
| Basal [Zn(II)], ( $\mu$ M) | <b>2.33</b>      | <b>9.66</b>   | <b>2.10</b> | <b>3.51</b>             | <b>6.51</b>  | 1.40        | 0.80              | 1.15          | 0.75        | <b>1.83</b>             | <b>4.97</b>  | 0.62        |
| 0                          | 1.00             | 1.00          | 1.00        | 1.00                    | 1.00         | 1.00        | 1.00              | 1.00          | 1.00        | 1.00                    | 1.00         | 1.00        |
| 5                          | 0.95             | 0.57          | <b>0.73</b> | <b>0.49</b>             | 0.94         | 0.87        | 0.89              | <b>0.59</b>   | 0.86        | <b>0.35</b>             | 0.93         | 0.96        |
| 10                         | 0.93             | <b>0.48</b>   | <b>0.84</b> | <b>0.53</b>             | 0.90         | 0.80        | 0.84              | 0.60          | 0.86        | <b>0.39</b>             | 0.94         | 1.02        |
| 25                         | 0.89             | <b>0.40</b>   | 0.98        | 0.65                    | 0.90         | 0.76        | 0.83              | 0.57          | 0.95        | <b>0.58</b>             | 1.00         | 0.91        |
| 50                         | 0.88             | <b>0.40</b>   | 1.00        | 0.68                    | 0.92         | 0.79        | 0.83              | <b>0.58</b>   | 1.08        | <b>0.53</b>             | 1.08         | <b>0.84</b> |
| 75                         | 0.84             | <b>0.41</b>   | 0.92        | 0.68                    | 0.88         | 0.82        | 0.85              | 0.70          | 1.22        | <b>0.43</b>             | 1.07         | <b>0.79</b> |
| 100                        | 0.82             | <b>0.42</b>   | 0.82        | 0.63                    | 0.86         | 0.81        | 0.92              | 0.71          | 0.98        | <b>0.35</b>             | 0.95         | <b>0.61</b> |
| 150                        | 0.80             | <b>0.40</b>   | <b>0.76</b> | 0.66                    | 0.85         | 0.81        | 0.91              | 0.71          | 0.83        | <b>0.32</b>             | 0.95         | <b>0.77</b> |
| 250                        | 0.78             | <b>0.42</b>   | <b>0.71</b> | 0.65                    | 0.85         | 0.87        | 0.97              | 0.72          | 0.78        | <b>0.33</b>             | 0.99         | <b>0.83</b> |
| 500                        | 0.83             | <b>0.46</b>   | <b>0.71</b> | 0.68                    | 0.90         | 0.90        | 1.09              | 0.77          | 0.66        | <b>0.35</b>             | 0.97         | <b>0.87</b> |
| 750                        | 1.01             | <b>0.45</b>   | <b>0.69</b> | 0.64                    | 1.03         | 0.87        | <b>1.27</b>       | 0.78          | 0.78        | <b>0.35</b>             | 0.96         | 0.99        |
| 1000                       | 0.97             | <b>0.46</b>   | <b>0.72</b> | 0.64                    | 1.05         | 0.93        | 1.05              | 0.70          | 0.82        | <b>0.33</b>             | 0.90         | <b>1.20</b> |

A *gfp* fusion plasmid was constructed on the basis of plasmid pBBR\_MCS2 and designated pBBR-GFP13. Fragments containing the promoter regions of *zupT* and *cobW1* were cloned upstream of the promoterless *gfp* gene). The resulting plasmids were transferred by conjugation into the *C. metallidurans* strains CH34 wild type, its plasmid-free derivative AE104, and the AE104 mutants  $\Delta zupT$ ,  $\Delta e4$  ( $\Delta zntA \Delta cadA \Delta fieF \Delta dmeF$ ),  $\Delta e4 \Delta zupT$ , and  $\Delta zur$  (=  $\Delta furC$ ). The negative control contained just plasmid pBBR-GFP13. The cells were

incubated in TMM containing various concentrations of EDTA or zinc chloride and the specific activity of the GFP fluorescence was calculated in nmol per  $\mu\text{g}$  dry weight. There was no difference of the specific activities from the negative controls, which always gave  $11.27 \pm 3.97$  nmol/ $\mu\text{g}$ . To obtain the basal expression levels, the specific fluorescence activity coming from the promoter fusions were divided by this background value coming from the negative controls and the D-value was calculated as a measure of significance ( $D = \text{absolute distance of the mean values divided by the sum of the deviations}$ , if  $D > 1$ , the differences are significant if  $n \geq 3$ ). Bold basal values indicate  $D > 1$ , green and bold values additionally a ratio  $> 2$ . Since the values resulting from cultures incubated without added zinc should be similar to those coming from cultures without added EDTA, another control for the integrity of the data was obtained. Secondly, all values coming from cultures with added zinc or EDTA were compared to the respective basal levels, indicating up- or down-regulation. Again,  $D > 1$  is indicated by bold-faced numbers, green means more than 2-fold up-regulation and red more than 2-fold down-regulation with respect to the associated basal level value obtained for TMM without additions. Repeats (n) between 3 and 14.

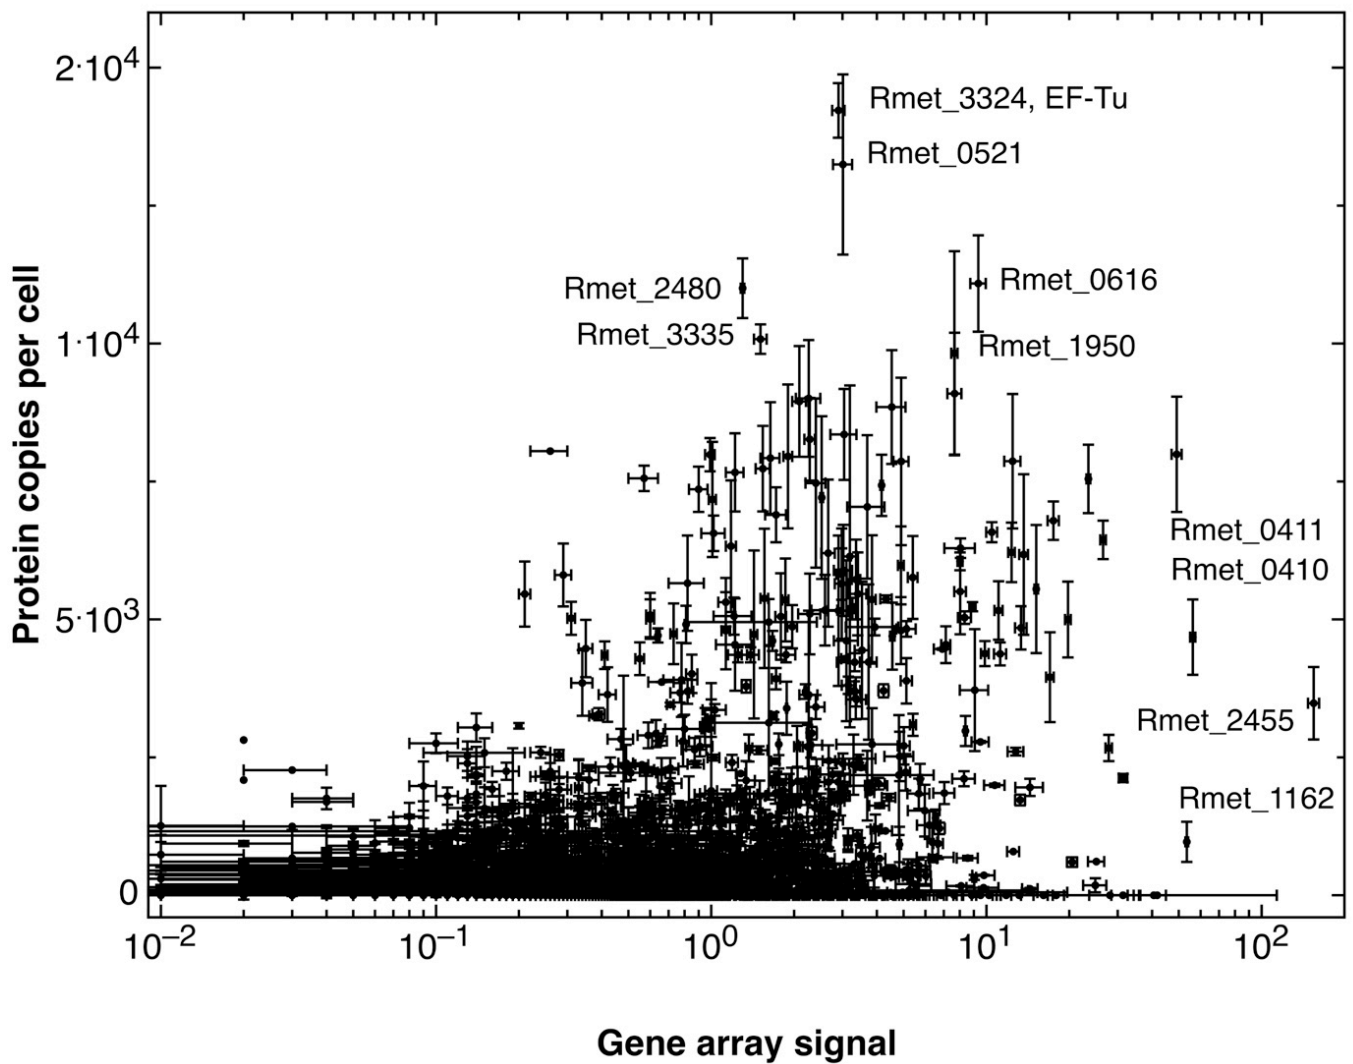

**Supplementary Figure S1. Comparison of transcriptome and proteome data.** The spot densities from a gene array experiment with strain AE104 cells ( $n = 3$ , overall density of the array normalized to 10,000 arbitrary gene-specific and intergenic RNAs per cell) cultivated in TMM without additions were compared to the number of proteins per cell obtained from the same strain cultivated under the same conditions. Deviation bars for both axis are given. The position of a few proteins versus their gene array signals are labeled.
